# Supplementary material for: Serum proteomics reveals disorder of lipoprotein metabolism in sepsis
Source: Life Sci Alliance. 2021 Aug 24;4(10):e202101091. doi: 10.26508/lsa.202101091 (PMC8385306; doi:10.26508/lsa.202101091)
Supplement: Supplementary file 2 [file LSA-2021-01091_TableS2.xlsx]

## Sheet: Supplementary Table S2
Table S2. List of proteins identified in serum samples of patients with sepsis and NC subjects.
Protein IDs	Majority protein IDs	Gene names	LFQ intensity H1	LFQ intensity H2	LFQ intensity H3	LFQ intensity H4	LFQ intensity H5	LFQ intensity H6	LFQ intensity H7	LFQ intensity H8	LFQ intensity H9	LFQ intensity H10	LFQ intensity H11	LFQ intensity H12	LFQ intensity H13	LFQ intensity H14	LFQ intensity H15	LFQ intensity H16	LFQ intensity H17	LFQ intensity H18	LFQ intensity H19	LFQ intensity H20	LFQ intensity H21	LFQ intensity H22	LFQ intensity H23	LFQ intensity H24	LFQ intensity H25	LFQ intensity H26	LFQ intensity H27	LFQ intensity H28	LFQ intensity H29	LFQ intensity H30	LFQ intensity H31	LFQ intensity S1	LFQ intensity S2	LFQ intensity S3	LFQ intensity S4	LFQ intensity S5	LFQ intensity S6	LFQ intensity S7	LFQ intensity S8	LFQ intensity S9	LFQ intensity S10	LFQ intensity S11	LFQ intensity S12	LFQ intensity S13	LFQ intensity S14	LFQ intensity S15	LFQ intensity S16
A3EZ82	A3EZ82	DMKN	0	98808000	0	0	0	0	0	0	0	0	44904000	0	0	0	0	0	0	36179000	40483000	39389000	0	0	57340000	0	0	0	0	31212000	61549000	0	36301000	350830000	0	150340000	82314000	0	77531000	0	0	0	140530000	88602000	0	0	22208000	0	42577000
ENSBTAP00000006074	ENSBTAP00000006074		1535200000	0	287750000	2740600000	2402300000	2425300000	0	2413400000	3217200000	3027400000	1984400000	0	0	0	0	0	428930000	2700300000	2561400000	2281300000	3070800000	2368100000	2763100000	0	1600300000	1582000000	1784800000	0	2681300000	311610000	2781600000	1992700000	1921800000	1882600000	2457300000	1167500000	3356600000	1815600000	3269400000	2019500000	1866900000	2033300000	1949800000	0	1228400000	0	0
ENSBTAP00000014147	ENSBTAP00000014147		57646000	58663000	0	0	30195000	0	95372000	34214000	0	102050000	0	49335000	65013000	0	69175000	0	54726000	41553000	0	73018000	0	0	0	0	108180000	0	26881000	0	0	27266000	57173000	211560000	0	173710000	409220000	597250000	0	207040000	144390000	0	381080000	0	78479000	89784000	0	0	54700000
ENSBTAP00000031900	ENSBTAP00000031900		0	0	0	0	0	0	0	0	0	0	0	0	0	0	0	0	0	0	0	0	0	0	0	0	0	0	0	0	0	0	0	0	0	0	0	0	0	0	0	0	0	0	0	0	0	0	0
P00761	P00761		43451000000	87064000000	42996000000	50070000000	49221000000	51291000000	53285000000	75101000000	40456000000	50684000000	47186000000	47704000000	36702000000	51605000000	47051000000	44854000000	44842000000	57692000000	95883000000	79278000000	54199000000	59728000000	47979000000	55500000000	45114000000	43613000000	40010000000	43876000000	43526000000	46800000000	42132000000	85109000000	55330000000	78831000000	57497000000	68552000000	54901000000	64282000000	73881000000	66377000000	73118000000	47548000000	69644000000	62548000000	60332000000	56209000000	52989000000
P01030	P01030		0	6340200000	2676500000	3375300000	4574400000	2150800000	0	2878700000	8310200000	0	7327000000	2941300000	5602000000	0	6141000000	2907300000	2048400000	298680000	0	0	0	0	0	0	3405400000	0	7112300000	5404000000	4718800000	0	1087000000	0	0	10383000000	12302000000	14307000000	0	0	6045900000	5270700000	5693100000	0	0	2203700000	2324500000	0	0
P01966	P01966		8094200	0	18790000	19887000	90657000	21416000	17736000	0	49171000	0	0	14242000	0	27072000	0	192630000	0	0	24816000	0	0	0	0	0	95526000	0	3531900	0	11012000	154370000	46040000	0	0	0	0	43707000	0	121000000	0	85745000	0	0	54760000	0	31056000	24162000	0
P02533	P02533	KRT14	38433000	97009000	78569000	21045000	51658000	43338000	88873000	0	84668000	135330000	0	94601000	10170000	56228000	18446000	0	0	114970000	47447000	55551000	0	43361000	35242000	63762000	74565000	82478000	62313000	8153400	0	91947000	6466100	0	68869000	149430000	90098000	112910000	270940000	79705000	62442000	0	51798000	77605000	0	0	0	0	32585000
P02538	P02538	KRT6A	0	0	0	0	0	0	0	0	111040000	98390000	100970000	127420000	0	0	75517000	0	172390000	92466000	131390000	0	24732000	110620000	0	0	81136000	0	0	0	0	0	0	133740000	163440000	80679000	164710000	76973000	284210000	102290000	160260000	129640000	135540000	187690000	129300000	80115000	0	100820000	108550000
P02662	P02662		0	0	39934000	19431000	37371000	0	0	9320300	0	10957000	19409000	0	0	0	8925600	0	0	0	10795000	17659000	0	0	0	11605000	14793000	14239000	29281000	11516000	8749200	0	0	0	20435000	134780000	43263000	19628000	24602000	0	0	238780000	15153000	0	0	13880000	36451000	0	0
P02754	P02754		0	0	0	0	0	0	0	0	0	0	0	0	62103000	0	0	0	0	63484000	0	0	0	0	0	0	0	0	0	0	0	0	0	0	0	241490000	0	88429000	0	45063000	0	225140000	0	0	0	0	0	0	0
P02768	P02768	ALB	1360000000000	1800000000000	1250000000000	1350000000000	1360000000000	1790000000000	1200000000000	1640000000000	1510000000000	1340000000000	1580000000000	1820000000000	1970000000000	1670000000000	1330000000000	1560000000000	1070000000000	2040000000000	1670000000000	1930000000000	1070000000000	1360000000000	1650000000000	1370000000000	1190000000000	1350000000000	1420000000000	2200000000000	1940000000000	1490000000000	1170000000000	3920000000000	1370000000000	2720000000000	2220000000000	3660000000000	1330000000000	2390000000000	1810000000000	1810000000000	2200000000000	1900000000000	2400000000000	2070000000000	1910000000000	1150000000000	2020000000000
P02769	P02769		7144800000	60514000	0	88395000	193250000	194190000	2068000000	91427000	371580000	375520000	94335000	155040000	222880000	414550000	198270000	140180000	0	176720000	43983000	18774000	0	340100000	236730000	262420000	281800000	249410000	363350000	1731500000	399750000	151900000	279720000	1813000000	0	487810000	410080000	770570000	1144300000	505110000	305610000	333310000	488030000	160230000	232390000	233580000	0	307590000	53758000
P05787	P05787	KRT8	0	0	0	0	0	0	0	0	0	0	0	0	0	0	0	0	0	0	0	0	0	0	0	37559000	0	0	48651000	0	0	0	0	0	0	0	0	0	0	0	69792000	0	0	0	0	45504000	0	0	0
P06868	P06868		0	0	0	0	0	0	0	0	0	0	0	0	0	0	0	0	0	0	0	0	0	0	0	0	0	0	0	0	0	0	0	0	0	0	0	0	0	0	0	0	0	0	0	0	0	0	0
P08779	P08779	KRT16	0	0	0	0	0	0	0	0	0	0	0	0	0	0	0	0	0	0	0	0	0	0	0	0	0	0	0	0	0	0	0	0	245780000	43042000	0	0	218710000	0	0	181340000	0	0	39856000	39752000	0	0	0
P13645	P13645	KRT10	1276400000	2518800000	2169300000	1843900000	495840000	1446300000	1442300000	1247500000	2206200000	2945900000	1642900000	4254500000	1601100000	2550200000	1348200000	1215700000	2007200000	1592800000	1694500000	2344700000	2082700000	2514000000	1538100000	1485500000	1745900000	2494900000	4396400000	2568600000	1279400000	1526500000	1502500000	1730800000	1290000000	3923200000	1928900000	1933600000	1470700000	2008400000	2384700000	1529500000	2429800000	701010000	1949000000	1989600000	2538200000	687500000	2273800000
P13647	P13647	KRT5	98732000	88401000	51239000	100580000	0	0	0	0	129340000	154340000	113080000	221810000	0	0	0	0	108650000	81491000	0	226600000	132160000	131760000	306730000	69322000	127140000	181020000	177880000	141670000	0	92136000	0	0	175720000	0	0	0	242060000	138140000	0	153580000	0	0	0	109130000	0	0	0
Q05B55	Q05B55		0	0	0	0	16111000000	0	110880000	0	147030000	0	0	12553000000	124920000	8552000000	6817400000	0	12342000000	9173300000	0	0	92949000	9475800000	18774000000	0	118340000	0	0	4506400000	0	0	0	0	0	0	0	0	0	0	0	0	0	8016600000	0	58387000	0	0	0
Q1RMN8	Q1RMN8		23164000	548090000	575860000	413400000	0	251800000	0	172940000	319900000	757070000	260970000	633560000	471970000	662690000	997640000	592650000	311490000	370990000	0	497970000	211040000	513020000	402320000	946620000	382190000	468790000	321590000	443020000	286310000	524930000	431260000	421020000	0	1263600000	0	1260600000	0	0	0	1134500000	1172200000	0	371910000	532860000	602600000	189910000	691910000
Q28107	Q28107		131940000	192510000	0	208730000	350290000	356790000	0	102540000	149300000	61855000	95961000	152910000	195030000	253830000	158500000	335760000	85889000	332300000	188320000	171900000	145030000	280280000	173170000	225020000	244170000	91922000	58067000	0	62869000	154620000	173070000	93238000	287550000	295130000	212240000	150570000	174130000	208810000	337110000	0	0	265840000	309790000	0	78615000	172710000	58867000
Q2HJF0	Q2HJF0		0	0	0	0	0	0	0	0	0	0	0	0	0	0	106770000	0	0	0	0	0	0	0	0	0	282950000	0	0	0	0	0	0	0	0	76236000	156460000	0	0	107870000	44000000	59482000	0	64027000	0	121540000	0	128150000	0
Q2KIS7	Q2KIS7		0	0	0	0	0	0	0	0	0	0	0	0	43153000	0	0	0	0	0	0	0	0	0	0	0	0	0	0	0	0	0	0	0	0	0	0	0	0	0	0	0	0	0	0	0	0	0	0
Q7RTS7	Q7RTS7	KRT74	0	0	0	0	0	0	0	0	0	0	0	0	0	0	0	0	0	0	0	0	0	0	0	0	0	0	0	0	0	0	0	0	0	0	0	0	0	0	0	0	0	0	0	0	0	0	0
Q3ZBD7	Q3ZBD7		0	0	0	0	0	0	0	0	0	0	0	0	0	0	0	0	0	0	0	0	0	0	0	0	0	0	0	0	0	0	0	0	0	0	0	0	0	0	0	0	0	0	0	0	0	0	0
Q3ZBS7	Q3ZBS7		0	0	0	0	0	0	0	0	0	0	0	0	0	0	0	0	0	0	0	0	0	0	0	0	0	0	0	0	0	0	0	0	0	0	0	0	0	0	0	0	0	0	0	0	0	0	0
Q5D862	Q5D862	FLG2	0	0	0	0	0	0	0	0	0	0	0	0	0	0	0	0	0	0	0	0	0	0	0	0	0	0	0	0	0	0	0	0	0	0	0	0	0	0	0	0	0	0	0	0	0	0	0
Q61782	Q61782		107240000	157470000	123200000	123960000	153980000	188210000	180270000	207530000	157670000	206010000	138520000	131840000	199950000	159160000	181070000	185670000	0	181070000	221210000	158220000	73534000	178620000	86459000	111280000	365550000	162760000	196550000	179050000	251550000	118210000	161720000	308200000	91940000	0	0	0	217610000	196990000	0	0	0	101870000	0	155690000	118600000	159930000	72499000
Q6IME9	Q6IME9	KRT72	335820000	167760000	84917000	118120000	85448000	49389000	500460000	393840000	514120000	442350000	447230000	94736000	119500000	120950000	280020000	373430000	283180000	0	246480000	71128000	65294000	221380000	94196000	444590000	192360000	199670000	176550000	0	207110000	42344000	101480000	328840000	151800000	366710000	220630000	366730000	286270000	267590000	38862000	300990000	173850000	101670000	213070000	103330000	235520000	47626000	194770000
Q86YZ3	Q86YZ3	HRNR	31453000	67155000	82233000	139830000	0	153060000	222150000	219530000	94778000	65576000	68927000	1113500000	113380000	347330000	36980000	52805000	73196000	181500000	83550000	258990000	393480000	14806000	115040000	0	95442000	494930000	962990000	395900000	248310000	51222000	241820000	92054000	99004000	380200000	101450000	55891000	0	15646000	140480000	50830000	67340000	115820000	257610000	147470000	0	26713000	28810000
P02461	P02461	COL3A1	0	0	0	0	0	0	0	0	0	0	0	0	0	0	0	0	0	0	0	0	0	0	0	0	0	0	0	0	0	0	0	0	0	0	0	0	0	0	0	0	0	0	0	0	0	0	0
P04264	P04264	KRT1	2720500000	5993600000	4529200000	4198200000	2218100000	3957700000	2934600000	2355300000	4979800000	5823500000	3622900000	13254000000	2751500000	6044500000	3339300000	3517800000	4568900000	3483000000	4111300000	7866200000	6343000000	6254100000	2461000000	3268600000	1936800000	6154400000	13619000000	6076200000	3468900000	3383500000	3270000000	4857800000	4721700000	10744000000	3859800000	4060800000	5145000000	4688400000	5864900000	4274600000	4760900000	2728000000	8279300000	4825900000	3533000000	1675400000	2575000000
P07951	P07951	TPM2	0	0	0	0	0	0	0	0	0	65513000	0	0	0	0	0	0	0	0	0	0	0	0	0	0	0	0	0	0	0	34612000	0	0	0	0	45269000	0	38659000	0	0	89082000	0	0	64159000	0	0	0	0
P07996	P07996	THBS1	5061100000	5729300000	5708200000	3734600000	5203600000	5413800000	4640200000	2728400000	6741400000	3605400000	5059600000	5540900000	6626300000	3219800000	6161200000	4590500000	3736400000	2056400000	7216300000	5127600000	5963600000	2460200000	3433700000	4495900000	6528100000	4964900000	4594100000	3003700000	3337400000	4827900000	4683300000	1161100000	2439200000	6766900000	1362500000	1858900000	5185000000	3579400000	1616600000	5795800000	1154700000	798140000	2240700000	9626900000	1560900000	5316600000	6844600000
P35527	P35527	KRT9	1451600000	2508600000	1654000000	2217700000	979240000	1505400000	1342600000	1899600000	1768100000	1314800000	1772100000	5384300000	1532400000	2830200000	1194900000	1185500000	1878500000	1257400000	2214700000	3241900000	2580800000	2001800000	1176500000	1830700000	599820000	4203700000	5739800000	2770800000	1486600000	1287000000	1562700000	1996600000	2854400000	5558600000	1576100000	1884400000	2250100000	2318400000	3360700000	1274800000	1181000000	1110300000	3031900000	1998600000	1361900000	511130000	817530000
P35908	P35908	KRT2	202590000	910350000	1089200000	867060000	321440000	592040000	245440000	235060000	610300000	996760000	499000000	2303800000	349100000	1041700000	314030000	273280000	1075200000	997300000	551510000	1260200000	803590000	1131300000	678970000	355100000	457380000	743630000	1671300000	1519700000	282510000	416030000	361440000	216810000	446870000	1543700000	487970000	169840000	575050000	607160000	836760000	250990000	873520000	103510000	829420000	505240000	611070000	42194000	521790000
A0M8Q6	A0M8Q6	IGLC7	1122000000	3556600000	951030000	1035000000	641560000	1068600000	3691900000	606180000	1205000000	1133600000	2208400000	2604100000	2098100000	781220000	1785300000	3582600000	1207900000	1063800000	5160300000	3819700000	85004000	1445100000	2334600000	791840000	2629800000	4076200000	6212600000	2001300000	1039800000	909220000	2769300000	6479200000	5442200000	4090800000	7482500000	9054000000	5972900000	7963900000	2147600000	4074000000	8788600000	4004700000	6061900000	1633900000	2218400000	2556900000	1481300000
A6NLP5	A6NLP5	TTC36	0	0	0	0	0	0	0	0	0	0	0	0	0	0	0	0	0	0	0	0	0	0	0	0	0	0	0	0	0	0	0	0	0	0	0	0	0	0	0	0	0	0	0	0	0	0	0
A6NMB1	A6NMB1	SIGLEC16	0	0	0	0	0	0	0	0	0	0	0	0	0	0	0	0	0	0	0	0	0	0	0	0	0	0	0	0	0	0	0	0	65047000	91159000	0	0	55207000	0	65192000	0	75084000	0	0	80355000	72853000	0	0
B9A064	B9A064	IGLL5	22123000000	38422000000	21695000000	18429000000	17959000000	27606000000	32458000000	16416000000	28118000000	43054000000	17767000000	41467000000	32919000000	10025000000	46972000000	24354000000	38677000000	29416000000	24052000000	41889000000	8930700000	29870000000	16768000000	22681000000	24626000000	24415000000	30881000000	17735000000	18072000000	21538000000	16644000000	45580000000	19174000000	96092000000	44429000000	43731000000	40397000000	45085000000	30319000000	55545000000	67625000000	25773000000	22632000000	16272000000	31867000000	10849000000	27639000000
O14498	O14498	ISLR	0	0	0	27962000	0	0	0	0	0	0	0	0	0	0	0	23724000	0	0	0	0	0	0	0	0	0	0	0	0	0	0	0	0	0	53439000	55045000	145340000	69847000	92773000	52566000	170070000	259090000	133090000	167960000	0	0	0	67094000
O14745	O14745	SLC9A3R1	0	0	0	0	0	0	0	0	0	0	0	0	0	0	0	0	0	0	0	0	0	0	0	0	0	0	0	0	0	0	0	0	0	0	0	0	0	0	0	0	0	0	0	0	0	0	0
O14786	O14786	NRP1	152580000	197010000	202280000	171170000	151570000	110170000	215690000	197550000	77800000	193500000	103600000	200290000	225130000	219910000	63801000	193850000	0	251500000	97770000	203230000	265180000	135050000	224170000	377990000	184070000	204050000	135380000	269030000	143410000	153870000	155090000	388240000	375830000	166620000	234140000	780920000	117190000	212750000	306580000	0	261750000	171580000	225710000	134330000	188140000	186630000	190830000
O14791	O14791	APOL1	13558000000	23247000000	16666000000	23671000000	20514000000	18068000000	14220000000	12727000000	19971000000	17871000000	26252000000	14251000000	17162000000	13514000000	13202000000	16615000000	13829000000	15770000000	19870000000	16449000000	13968000000	15480000000	17319000000	12906000000	9851700000	16806000000	14182000000	13322000000	16270000000	11664000000	14796000000	11989000000	8814800000	6384700000	13957000000	4366500000	16883000000	8965700000	12885000000	13884000000	2517300000	14962000000	14463000000	12855000000	12364000000	11372000000	10648000000
O14818	O14818	PSMA7	0	0	0	27013000	0	0	0	0	0	0	0	0	0	0	0	0	0	0	0	0	0	0	0	127040000	0	0	0	0	0	0	0	0	0	0	0	0	0	0	0	0	0	0	0	0	0	0	0
O15144	O15144	ARPC2	0	0	0	0	0	0	0	0	0	0	0	0	0	0	0	0	0	0	0	0	0	0	0	0	0	0	0	0	0	0	0	0	0	0	0	0	0	0	0	0	0	0	0	0	0	0	0
O15204	O15204	ADAMDEC1	0	0	36876000	0	32711000	60975000	30858000	114370000	0	79266000	0	66063000	0	101340000	0	0	37170000	0	38811000	95472000	58070000	0	34712000	94639000	0	84300000	56098000	0	38311000	0	0	0	0	0	126550000	0	0	0	0	0	0	29754000	89918000	92299000	38465000	105830000	136150000
O43707	O43707	ACTN4	0	0	0	0	0	0	0	0	0	0	0	0	0	0	0	0	0	0	0	0	0	0	0	0	0	0	0	0	0	0	0	0	0	0	110840000	0	0	0	0	0	0	0	0	0	0	0	0
O43852	O43852	CALU	0	0	0	0	0	0	0	0	0	0	0	0	0	0	0	0	0	0	0	0	0	0	0	0	0	0	0	0	0	0	0	0	0	0	0	0	0	0	0	0	0	0	0	0	0	0	0
O43866	O43866	CD5L	31907000000	11150000000	22529000000	8875300000	20233000000	7162700000	24458000000	6324200000	22584000000	30182000000	10473000000	21826000000	19380000000	8312400000	8054600000	10477000000	16964000000	13079000000	21859000000	12424000000	20280000000	14873000000	41745000000	31268000000	22227000000	8535500000	14108000000	7116200000	13901000000	7811600000	11916000000	13998000000	9241900000	12497000000	11936000000	18990000000	14883000000	8190400000	16352000000	30659000000	13400000000	20951000000	14077000000	13293000000	22402000000	4353600000	13449000000
O60462	O60462	NRP2	0	0	0	0	0	0	0	0	0	0	0	0	0	0	0	0	0	0	0	0	0	0	0	0	0	0	0	0	0	0	0	0	0	0	0	0	0	0	0	0	0	0	0	0	0	52947000	0
O60701	O60701	UGDH	0	0	0	0	0	0	0	0	0	0	0	0	0	0	0	31497000	0	0	0	0	0	0	0	0	0	0	0	0	0	0	0	0	0	41797000	0	0	0	0	0	0	0	0	0	0	0	0	0
Q99880	Q99880	HIST1H2BL	0	0	0	0	0	0	0	0	0	0	0	0	0	0	0	0	0	0	0	0	0	0	0	0	0	0	0	0	0	0	0	0	0	0	0	0	0	0	0	0	0	0	0	102520000	0	0	0
O75015	O75015	FCGR3B	182370000	299080000	582090000	0	288120000	0	299560000	114370000	178720000	82428000	0	70272000	0	278400000	141680000	372940000	437840000	118810000	247080000	0	93409000	74158000	0	0	102600000	0	0	144150000	0	257730000	220850000	0	103490000	290250000	0	0	0	0	0	237460000	0	0	0	106200000	1341100000	309500000	182080000
O75083	O75083	WDR1	70285000	0	97409000	87050000	0	0	0	0	0	0	27733000	129310000	0	0	0	0	0	0	21893000	0	0	0	0	132070000	0	0	0	0	0	0	0	116680000	0	0	0	0	0	39958000	21960000	0	46831000	0	0	0	0	0	0
O75369	O75369	FLNB	0	0	0	0	0	39449000	45390000	72124000	0	0	0	0	0	0	0	0	0	0	50352000	0	0	0	0	0	0	0	60052000	0	0	0	0	0	0	41779000	0	0	0	0	0	0	0	0	0	46012000	0	0	0
O75460	O75460	ERN1	90888000	188910000	176250000	200050000	232500000	126970000	71287000	185780000	147110000	123120000	92311000	125780000	94921000	106450000	113060000	218330000	142910000	127430000	177700000	139310000	138760000	255550000	177500000	132580000	67875000	162450000	78525000	0	99087000	132530000	141000000	340350000	333010000	252930000	398800000	60966000	417040000	377210000	418670000	428040000	115690000	282810000	310400000	296630000	273080000	192730000	188760000
O75636	O75636	FCN3	10639000000	4946100000	12917000000	14469000000	7698400000	11685000000	8924100000	7930800000	11946000000	9889800000	8645800000	6297300000	8808800000	9326000000	8454700000	4515400000	9779700000	7209600000	7983100000	10185000000	7222700000	3798500000	3119200000	7974300000	7592500000	9025200000	7386500000	5873100000	11831000000	6902600000	5651500000	4365200000	5180400000	4399200000	6504400000	20917000000	9111200000	6056100000	7389500000	5666600000	5870500000	5711900000	7557400000	7893000000	1595100000	8217900000	4612400000
O75874	O75874	IDH1	0	12917000	18516000	0	9142500	0	0	6486500	0	7573200	0	8259800	6191600	0	3586400	12600000	0	0	12203000	0	4828400	0	6828000	0	0	0	0	35325000	0	7698500	0	0	15939000	0	0	0	0	0	4221700	18684000	0	0	0	4302600	0	0	182890000
O75882	O75882	ATRN	11205000000	11781000000	11952000000	13458000000	13683000000	15977000000	15466000000	9927100000	11218000000	11353000000	15153000000	10651000000	13852000000	15924000000	11996000000	11691000000	11924000000	13284000000	13543000000	9837500000	16098000000	10810000000	13929000000	14299000000	12453000000	13039000000	13450000000	9873100000	15072000000	11118000000	11721000000	13695000000	8199200000	6974000000	9206500000	14975000000	10623000000	8976400000	8877800000	10889000000	11916000000	13068000000	8895400000	8467900000	10633000000	10819000000	11666000000
O75891	O75891	ALDH1L1	0	0	0	0	0	0	0	1550700000	161530000	0	159840000	0	0	0	178420000	0	0	0	0	0	0	0	0	0	0	0	163580000	0	0	0	0	2066400000	0	315390000	0	2050400000	0	2326500000	0	2088200000	200400000	1580000000	0	206530000	1914200000	0	0
O95154	O95154	AKR7A3	0	0	0	0	0	0	0	0	0	0	0	0	0	0	0	0	0	0	0	0	0	0	0	0	0	0	0	0	0	0	0	0	0	0	0	0	0	0	0	0	0	0	0	0	0	0	0
O95236	O95236	APOL3	45342000	72072000	61616000	46924000	0	53250000	79036000	86281000	83496000	146810000	56849000	68633000	57243000	62217000	59160000	53065000	0	0	79443000	94747000	0	0	0	0	71440000	0	46004000	34800000	62520000	43863000	0	204320000	0	0	51860000	0	0	59417000	0	60841000	83895000	0	106930000	42698000	45719000	0	101140000
O95394	O95394	PGM3	0	0	0	0	0	0	0	0	0	0	0	0	0	0	0	0	0	0	0	0	0	0	0	0	0	0	0	0	0	0	0	0	0	0	0	0	0	0	0	0	0	0	0	0	0	0	0
O95445	O95445	APOM	7430600000	3568600000	8803100000	8047500000	6076000000	7754300000	10851000000	4956000000	5523200000	8829300000	8277800000	6952700000	6217100000	6754700000	6489000000	3796500000	4878500000	6952800000	7157000000	9317800000	7809400000	3933300000	8793400000	5452000000	8779200000	9066100000	4725800000	5427700000	14003000000	7278600000	3854500000	1423700000	3979400000	1776200000	1898800000	723670000	3450200000	2871500000	1497500000	4383700000	2299600000	5027300000	3470400000	4205000000	4754800000	3164500000	3939800000
O95497	O95497	VNN1	334210000	269000000	178900000	270460000	505310000	209760000	0	0	1092500000	1306000000	638590000	0	285840000	152430000	258170000	336100000	0	298710000	79928000	1168500000	205090000	65250000	246930000	223090000	0	162530000	346690000	328530000	314590000	693070000	120730000	0	0	0	320560000	0	0	0	314230000	0	0	1163200000	0	0	98887000	56565000	0
O95810	O95810	SDPR	0	0	0	0	0	0	0	0	0	0	0	0	0	0	0	0	0	0	0	0	0	0	0	0	0	0	0	0	0	0	0	0	0	55333000	0	0	0	0	0	0	0	0	0	25307000	0	0	0
O95954	O95954	FTCD	0	0	0	0	0	0	0	0	0	0	0	0	0	0	0	0	0	0	0	0	0	0	0	0	0	0	0	0	0	0	158780000	52783000	0	0	0	0	0	0	0	259400000	0	0	0	0	0	0	0
O95998	O95998	IL18BP	0	0	0	0	0	0	0	0	0	0	0	0	0	0	0	0	0	0	0	0	0	0	0	0	0	0	0	0	0	0	0	0	0	0	55510000	0	0	78958000	0	0	58141000	0	0	0	74983000	0	0
P00167	P00167	CYB5A	0	0	0	0	0	0	0	0	0	0	0	0	0	0	0	0	0	0	0	0	0	0	0	0	0	0	0	0	0	0	0	99982000	0	0	0	0	0	0	0	0	0	0	0	37704000	0	0	142410000
P00325	P00325	ADH1B	0	0	0	0	0	0	0	0	0	0	0	0	0	0	0	0	0	0	0	0	0	0	0	0	0	4149600	3410200	0	0	0	6993800	540680000	15946000	0	22078000	0	23433000	23727000	28856000	10667000	0	12430000	18162000	177570000	0	0	313080000
P00326	P00326	ADH1C	0	67094000	57384000	0	56555000	0	12215000	0	59492000	49354000	153590000	0	73453000	0	0	45586000	35311000	0	0	65177000	0	0	0	0	0	0	0	0	0	0	0	76771000	32144000	0	32919000	46649000	40070000	64464000	58147000	41915000	101510000	0	0	0	47661000	86469000	58679000
P00338	P00338	LDHA	0	29512000	0	42289000	44601000	0	69386000	0	92102000	149410000	66255000	0	92111000	61514000	0	65179000	0	65627000	76161000	80195000	0	55564000	0	0	138000000	70695000	0	70526000	64672000	63113000	35019000	0	45690000	0	0	261180000	100980000	104510000	59580000	9552500	328090000	63384000	0	0	105900000	0	104480000
P00352	P00352	ALDH1A1	0	0	0	0	0	0	0	0	0	0	0	0	0	0	0	0	0	0	0	0	0	0	0	0	0	0	0	0	3388300	14989000	0	358240000	0	5072200	0	18969000	0	0	0	0	0	0	0	11722000	0	0	113430000
P00367	P00367	GLUD1	0	15771000	161910000	148250000	0	35376000	0	0	0	31389000	0	0	0	123570000	29616000	14443000	0	0	149970000	187030000	12701000	201350000	0	88487000	0	0	0	180150000	103370000	0	0	25612000	41078000	0	42945000	0	0	0	0	0	0	0	26583000	13433000	14159000	118990000	45519000
P00390	P00390	GSR	0	0	42028000	32646000	52346000	51191000	45395000	0	0	43665000	0	0	71752000	45120000	65256000	0	34722000	51922000	38261000	0	44665000	43037000	42247000	52342000	49152000	42008000	0	44311000	47248000	0	41959000	0	0	0	0	105640000	0	0	41782000	0	0	136460000	0	0	38105000	0	0
P00441	P00441	SOD1	52703000	0	0	0	105040000	127980000	0	237730000	64274000	0	83981000	95295000	0	79134000	115500000	318800000	57358000	0	96423000	0	102890000	0	96908000	0	219710000	138780000	0	0	137280000	156200000	280980000	2823700000	107410000	772750000	147700000	375500000	530940000	834590000	0	198350000	325310000	213660000	176530000	857170000	311660000	0	368850000
P00450	P00450	CP	241000000000	232000000000	287000000000	226000000000	247000000000	244000000000	210000000000	275000000000	236000000000	225000000000	252000000000	232000000000	214000000000	291000000000	235000000000	274000000000	270000000000	233000000000	283000000000	188000000000	286000000000	269000000000	329000000000	264000000000	261000000000	241000000000	238000000000	254000000000	272000000000	244000000000	278000000000	281000000000	315000000000	329000000000	406000000000	347000000000	358000000000	274000000000	432000000000	337000000000	349000000000	356000000000	350000000000	255000000000	269000000000	249000000000	216000000000
P00451	P00451	F8	0	0	0	0	0	0	0	0	0	0	0	0	0	0	0	0	0	0	0	0	0	0	0	0	0	0	0	0	65194000	0	0	0	0	0	0	0	0	236040000	0	109340000	0	0	90639000	0	0	0	0
P00480	P00480	OTC	0	0	0	0	0	0	0	0	14508000	24220000	0	13041000	9731600	0	0	0	0	0	13230000	10461000	0	0	0	0	0	8766400	0	0	0	11987000	8839600	28809000	0	19806000	0	34372000	0	0	0	23891000	0	0	0	0	0	0	53567000
P00488	P00488	F13A1	123390000	602120000	108250000	94721000	87287000	30779000	415950000	159200000	184200000	96944000	120560000	170380000	35590000	247760000	123850000	360870000	172240000	108890000	98968000	84077000	77621000	50361000	61573000	67048000	119160000	194720000	51522000	483140000	556960000	219230000	189280000	302420000	0	0	85049000	77728000	123040000	65537000	30136000	43970000	56463000	22437000	0	182810000	71449000	45683000	89823000
P00491	P00491	PNP	0	0	0	0	0	0	0	0	0	0	0	0	0	0	0	0	0	0	0	0	0	0	0	0	174070000	0	0	0	0	0	0	0	0	0	0	0	0	70236000	0	56708000	0	0	0	0	0	0	0
P00492	P00492	HPRT1	0	0	0	0	0	0	0	0	0	0	0	0	0	0	0	0	0	0	0	0	0	0	0	0	0	0	0	0	0	0	0	0	0	0	0	0	0	0	0	0	0	0	0	0	0	0	0
P00505	P00505	GOT2	46934000	13985000	14603000	0	0	0	0	0	11176000	15143000	18933000	0	0	0	0	0	0	0	0	0	0	0	10345000	0	12219000	36081000	29623000	0	0	0	27521000	8521800	0	0	0	0	0	0	11172000	15964000	0	0	29638000	0	0	0	6601500
P00558	P00558	PGK1	0	0	0	53986000	0	0	59210000	0	0	49505000	0	0	0	0	0	0	0	0	0	0	0	17873000	0	0	0	0	0	0	0	0	0	21833000	12581000	28257000	21571000	28129000	17179000	31212000	0	60322000	30799000	0	0	24666000	20006000	0	0
P00734	P00734	F2	109000000000	117000000000	128000000000	98840000000	106000000000	115000000000	104000000000	83288000000	107000000000	104000000000	142000000000	89798000000	118000000000	110000000000	107000000000	93846000000	101000000000	123000000000	102000000000	109000000000	115000000000	101000000000	119000000000	95133000000	103000000000	94085000000	94416000000	95499000000	105000000000	102000000000	118000000000	71466000000	108000000000	94228000000	66769000000	42472000000	92832000000	80441000000	101000000000	99733000000	87121000000	128000000000	110000000000	83689000000	73194000000	106000000000	90780000000
P00736	P00736	C1R	18025000000	17413000000	15272000000	21481000000	22593000000	18814000000	19566000000	17658000000	20077000000	23849000000	21306000000	15992000000	18024000000	18359000000	14777000000	16431000000	17252000000	15757000000	15086000000	16853000000	16434000000	18936000000	18544000000	20060000000	16774000000	12206000000	16986000000	16385000000	16879000000	15886000000	15705000000	18274000000	24037000000	19867000000	19659000000	17708000000	27680000000	19470000000	20113000000	23344000000	20970000000	28580000000	20524000000	16277000000	14813000000	23825000000	17838000000
P00738	P00738	HP	560000000000	777000000000	670000000000	751000000000	806000000000	629000000000	431000000000	924000000000	676000000000	655000000000	456000000000	552000000000	431000000000	558000000000	675000000000	841000000000	763000000000	685000000000	706000000000	614000000000	640000000000	1060000000000	791000000000	768000000000	376000000000	718000000000	542000000000	626000000000	523000000000	666000000000	705000000000	1430000000000	1110000000000	1160000000000	1340000000000	121000000000	1340000000000	1340000000000	1520000000000	1230000000000	562000000000	1230000000000	1270000000000	908000000000	790000000000	797000000000	805000000000
P00739	P00739	HPR	13890000000	27454000000	16187000000	24994000000	21597000000	16256000000	15800000000	14488000000	21518000000	5687200000	27987000000	13938000000	15104000000	12344000000	8772300000	11155000000	10686000000	17634000000	11484000000	10449000000	11747000000	6289300000	22281000000	11195000000	3998700000	20240000000	10181000000	17938000000	24413000000	9644000000	13507000000	26803000000	7171700000	2812600000	20071000000	3691400000	25344000000	8568400000	16272000000	10999000000	4618000000	17677000000	19349000000	12805000000	12902000000	5699200000	8974400000
P00740	P00740	F9	3332800000	3363400000	3881700000	3425000000	3259100000	3761600000	3108100000	2908900000	3077000000	3713800000	3620900000	2233100000	3528400000	4230200000	4964000000	2988400000	3461500000	4006700000	3424900000	3064100000	4193100000	2607900000	3363900000	4344800000	3826100000	4170900000	3798400000	4533000000	3142900000	2985900000	3444200000	1863500000	5211800000	2716800000	2674800000	1152100000	3910700000	2926500000	2313100000	2936300000	2292300000	6191000000	2891300000	4015100000	3255000000	4562900000	4065600000
P00742	P00742	F10	4204800000	3861200000	3917700000	4205700000	3952600000	5518000000	3165500000	3585600000	4170100000	4109000000	5588300000	4287800000	4442400000	4328600000	4742000000	3420900000	4079800000	4057900000	4016700000	3132400000	5125200000	3258200000	4114000000	3805200000	6248800000	5518900000	3947700000	5657800000	6900700000	4412400000	4094900000	2548900000	3019500000	4456400000	2341100000	5691000000	5537400000	2616800000	4510000000	3351500000	4357700000	4563400000	4402200000	3272000000	3867600000	4366400000	4433200000
P00746	P00746	CFD	295260000	781590000	468120000	416030000	333420000	541090000	353100000	2401500000	460490000	374230000	583520000	455320000	506570000	584220000	708240000	507240000	261550000	614870000	194530000	471680000	236180000	387640000	286940000	208970000	360970000	350470000	316070000	575220000	407420000	427090000	328700000	2877700000	1116100000	1389900000	1092600000	1162600000	2177900000	958790000	441620000	940570000	1049600000	568640000	1076200000	1339600000	1083100000	454250000	1017800000
P00747	P00747	PLG	80958000000	109000000000	94384000000	88136000000	98379000000	111000000000	93480000000	98569000000	110000000000	112000000000	113000000000	88577000000	101000000000	93955000000	89869000000	87560000000	85703000000	109000000000	102000000000	127000000000	89241000000	112000000000	88506000000	73748000000	106000000000	90012000000	79989000000	103000000000	114000000000	108000000000	96870000000	105000000000	73468000000	80373000000	85371000000	42992000000	96512000000	54303000000	103000000000	86890000000	84948000000	117000000000	85137000000	87342000000	71225000000	113000000000	107000000000
P00748	P00748	F12	10917000000	20020000000	12044000000	23930000000	13119000000	25455000000	15190000000	8558600000	11623000000	18731000000	20924000000	9885900000	10558000000	18788000000	12581000000	14251000000	13065000000	11636000000	11389000000	28428000000	22784000000	14146000000	17278000000	15517000000	22186000000	14908000000	15939000000	10783000000	28453000000	19781000000	11027000000	16642000000	11729000000	6720200000	6900600000	4642300000	6717400000	10164000000	6541300000	8890700000	6845100000	13883000000	6305800000	11203000000	6170400000	9794500000	16483000000
P00751	P00751	CFB	118000000000	124000000000	115000000000	121000000000	132000000000	135000000000	96014000000	137000000000	129000000000	126000000000	130000000000	89293000000	116000000000	182000000000	137000000000	139000000000	101000000000	146000000000	146000000000	94791000000	127000000000	178000000000	122000000000	115000000000	112000000000	95793000000	124000000000	140000000000	123000000000	134000000000	119000000000	146000000000	154000000000	86631000000	161000000000	94526000000	181000000000	163000000000	214000000000	124000000000	152000000000	186000000000	206000000000	174000000000	155000000000	111000000000	165000000000
P00915	P00915	CA1	510090000	574090000	1026000000	968910000	2042500000	1545000000	229760000	723190000	904150000	455880000	302870000	1089500000	760170000	250800000	201100000	8086400000	694780000	355970000	1929100000	1414300000	372950000	143230000	952290000	350440000	4285500000	913550000	1112000000	1533500000	4784900000	2080900000	1803900000	349560000	318450000	2979200000	296320000	9715700000	900410000	27525000000	474850000	6547500000	1597800000	1168100000	7960200000	3883200000	2304800000	2761800000	1080400000
P00918	P00918	CA2	0	0	70314000	0	198030000	0	30053000	0	10303000	113520000	0	49245000	28545000	0	0	1084700000	27815000	35723000	208560000	32693000	0	56043000	0	0	583130000	31418000	64438000	79175000	204170000	159680000	193080000	32058000	26162000	42106000	22259000	1456200000	76635000	5795100000	24628000	1034600000	88507000	29775000	1217000000	140360000	76293000	212210000	22779000
P00966	P00966	ASS1	2496100	0	0	0	3508400	0	0	0	1765600	2029400	0	4693800	3429900	0	0	0	0	3932500	2719000	5288000	0	3544200	0	0	2560400	0	3587500	5454600	0	0	0	0	4052500	8102300	0	0	0	0	0	6046500	0	0	5613100	0	5217000	0	0
P00995	P00995	SPINK1	0	0	0	0	0	0	0	0	0	0	0	0	0	0	0	0	0	0	0	0	0	0	0	0	0	0	0	0	0	0	0	164780000	0	89479000	127670000	148560000	0	80582000	0	0	112710000	0	0	0	0	44526000	0
P01008	P01008	SERPINC1	69593000000	89748000000	74365000000	61363000000	71082000000	64756000000	94036000000	76966000000	89825000000	86908000000	89739000000	68117000000	72626000000	80726000000	64378000000	81895000000	77207000000	84045000000	84592000000	85834000000	95924000000	87867000000	66113000000	75500000000	71800000000	83184000000	51368000000	89916000000	86224000000	82103000000	56010000000	92143000000	50514000000	41725000000	115000000000	29303000000	58760000000	46080000000	70529000000	61350000000	60158000000	68726000000	66932000000	59566000000	67584000000	69566000000	73817000000
P01009	P01009	SERPINA1	628000000000	593000000000	603000000000	584000000000	652000000000	742000000000	632000000000	731000000000	620000000000	626000000000	607000000000	706000000000	648000000000	733000000000	684000000000	738000000000	587000000000	726000000000	597000000000	657000000000	659000000000	781000000000	662000000000	809000000000	578000000000	754000000000	683000000000	774000000000	556000000000	667000000000	667000000000	1010000000000	1130000000000	1280000000000	1170000000000	1120000000000	1120000000000	1340000000000	1310000000000	898000000000	1370000000000	922000000000	1190000000000	821000000000	790000000000	851000000000	757000000000
P01011	P01011	SERPINA3	109000000000	89023000000	98993000000	89938000000	105000000000	101000000000	99284000000	116000000000	79141000000	97744000000	93168000000	84396000000	93186000000	117000000000	103000000000	112000000000	84951000000	89814000000	80936000000	87119000000	129000000000	92782000000	110000000000	121000000000	82795000000	76397000000	96040000000	93176000000	88113000000	93596000000	122000000000	213000000000	165000000000	337000000000	254000000000	213000000000	220000000000	304000000000	261000000000	163000000000	344000000000	225000000000	250000000000	127000000000	230000000000	251000000000	138000000000
P01019	P01019	AGT	57210000000	40568000000	45422000000	38038000000	48584000000	45265000000	47998000000	43935000000	56821000000	50996000000	52319000000	33472000000	48716000000	39728000000	40869000000	33439000000	42394000000	47844000000	55775000000	48042000000	52221000000	37248000000	36312000000	51215000000	52001000000	40607000000	38127000000	41199000000	70458000000	41279000000	45527000000	43743000000	57909000000	93881000000	54632000000	48352000000	59403000000	56376000000	57228000000	38472000000	80214000000	90184000000	58580000000	29730000000	40055000000	66429000000	29315000000
P01023	P01023	A2M	1240000000000	949000000000	864000000000	855000000000	856000000000	1020000000000	962000000000	870000000000	759000000000	986000000000	838000000000	1050000000000	903000000000	1280000000000	790000000000	1400000000000	1540000000000	1050000000000	803000000000	1110000000000	1480000000000	825000000000	1160000000000	1260000000000	990000000000	1040000000000	1000000000000	1030000000000	995000000000	1010000000000	781000000000	806000000000	664000000000	1020000000000	1080000000000	1620000000000	950000000000	1210000000000	670000000000	911000000000	1470000000000	638000000000	915000000000	678000000000	868000000000	1110000000000	879000000000
P01031	P01031	C5	11496000000	11704000000	13135000000	11651000000	10314000000	15795000000	8958900000	17354000000	12717000000	18539000000	16091000000	10550000000	16617000000	12152000000	12391000000	12767000000	13131000000	15171000000	17720000000	14663000000	13075000000	16266000000	13815000000	11204000000	15110000000	12270000000	11867000000	14718000000	13927000000	17353000000	11409000000	8011700000	15553000000	8055200000	11754000000	7411900000	17657000000	7643000000	16335000000	16078000000	12623000000	16051000000	14526000000	14297000000	14010000000	21696000000	15262000000
P01033	P01033	TIMP1	0	0	0	0	36537000	0	0	59132000	48252000	0	0	0	18555000	0	52871000	0	0	0	0	0	0	0	0	54221000	0	0	0	0	0	28443000	0	0	0	0	0	70674000	81243000	0	110930000	108720000	0	102880000	0	244410000	81950000	0	378830000
P01034	P01034	CST3	74390000	446660000	270410000	117760000	45068000	45352000	140170000	1601100000	357530000	160940000	373010000	0	251680000	132270000	277970000	224290000	96658000	368400000	179860000	60216000	19976000	131740000	146730000	424140000	82204000	254870000	212020000	379800000	163140000	202970000	85312000	2478300000	825880000	1219600000	1506100000	1692900000	1699800000	1193000000	396920000	312380000	853130000	656990000	1514900000	1129000000	1482500000	590330000	1014300000
P01042	P01042	KNG1	135000000000	140000000000	140000000000	119000000000	143000000000	143000000000	173000000000	120000000000	143000000000	154000000000	128000000000	122000000000	124000000000	138000000000	143000000000	128000000000	141000000000	126000000000	146000000000	121000000000	149000000000	151000000000	170000000000	171000000000	150000000000	171000000000	140000000000	126000000000	171000000000	139000000000	147000000000	176000000000	112000000000	114000000000	141000000000	89657000000	135000000000	78248000000	150000000000	120000000000	115000000000	128000000000	139000000000	132000000000	117000000000	119000000000	130000000000
P01236	P01236	PRL	0	0	0	0	0	0	0	0	0	0	0	0	0	0	0	0	0	0	0	0	0	0	0	0	0	0	0	0	0	0	0	102280000	0	0	0	0	0	0	0	0	0	27254000	0	0	0	0	0
P01258	P01258	CALCA	0	0	0	0	0	0	0	0	0	0	0	0	0	0	0	0	0	0	0	0	0	0	0	0	0	0	0	0	0	0	0	0	0	0	0	0	0	0	0	182070000	0	0	0	0	0	0	0
P01344	P01344	IGF2	203790000	442960000	482750000	275130000	336170000	293100000	224340000	301760000	465240000	511970000	375780000	217850000	167680000	208020000	327680000	287160000	252880000	359280000	284080000	467960000	200820000	311910000	115730000	136030000	196300000	97086000	143890000	185920000	279530000	393890000	0	489010000	503860000	187130000	588990000	144600000	437980000	282540000	246050000	240870000	114860000	178950000	530770000	436490000	333720000	116330000	270220000
P01591	P01591	IGJ	26604000000	16329000000	16408000000	15256000000	19052000000	17330000000	24465000000	10497000000	16671000000	12885000000	13157000000	16239000000	21176000000	8188000000	9469900000	11095000000	15112000000	22250000000	18410000000	7088700000	21031000000	15458000000	22472000000	34765000000	13808000000	12352000000	11187000000	7678100000	14310000000	12894000000	13541000000	8874900000	12013000000	19601000000	14326000000	13520000000	21593000000	19393000000	19657000000	22334000000	17798000000	18707000000	14422000000	13459000000	21174000000	16032000000	19223000000
P01593	P01593		0	0	0	87270000	0	0	110360000	316530000	417140000	1210400000	225380000	533390000	597510000	173640000	80584000	794920000	0	461660000	288040000	379830000	0	422580000	0	0	715190000	0	129140000	371080000	756340000	52844000	162320000	1157300000	0	283970000	0	1154000000	223050000	235240000	138890000	1842200000	240210000	0	423310000	0	0	154120000	0
P01594	P01594		0	241360000	99874000	49123000	37089000	0	0	61360000	96917000	401480000	36984000	96425000	38354000	0	179310000	97840000	84327000	91993000	0	137430000	141950000	0	24491000	288850000	62314000	170690000	243650000	72280000	0	0	26176000	257010000	0	437430000	157800000	127860000	174390000	0	57869000	0	127310000	76735000	116600000	0	240160000	55547000	54910000
P01597	P01597		244470000	1071800000	149800000	384190000	221620000	313950000	382320000	379380000	512480000	1440700000	565490000	503850000	509800000	701490000	501710000	278430000	147270000	521440000	1123500000	1158400000	323280000	272820000	658540000	1030800000	1285500000	898920000	476250000	490410000	215810000	436530000	530670000	548260000	386180000	959250000	1018500000	1097700000	755220000	487260000	336230000	1211900000	1088400000	244430000	378430000	586900000	1162900000	341890000	520300000
P01599	P01599		1505700000	1027700000	1978600000	1377200000	1097200000	292570000	1369300000	854140000	1119800000	2053500000	1145700000	741700000	1005400000	342950000	1619300000	742990000	566670000	3782200000	1205700000	2082400000	534480000	2229300000	915410000	2935000000	1103400000	1137300000	1245000000	2267500000	1441600000	1044100000	509550000	591360000	823640000	2874300000	484100000	1866500000	970180000	413440000	501000000	1901900000	1819300000	763420000	628880000	943830000	1631800000	724880000	713320000
P01600	P01600		0	0	0	0	0	0	0	0	0	0	0	0	0	0	0	0	0	0	0	45819000	0	0	0	59576000	42012000	53514000	44667000	0	32848000	0	0	0	0	48852000	0	0	0	118340000	0	56331000	53145000	0	0	0	0	44381000	0
P01601	P01601		0	0	40617000	0	122500000	0	44390000	0	0	0	0	228700000	41343000	0	0	0	0	0	0	0	0	0	0	0	0	0	0	0	0	0	0	168910000	0	302820000	448810000	92902000	0	0	285970000	0	206740000	221240000	0	0	0	0	296630000
P01602	P01602	IGKV1-5	1674000000	1816600000	2028500000	908160000	1371500000	587720000	1894600000	2181400000	2122700000	4127200000	2476700000	2166000000	1636400000	870810000	5436900000	765290000	1948100000	1782300000	3614200000	5472500000	2412500000	4816500000	7983500000	6767300000	5228300000	4587000000	3797700000	4082200000	2655300000	3165800000	4641900000	2595900000	3302400000	4521700000	1619300000	4042000000	2543200000	2002300000	4134100000	4204800000	7398100000	2185800000	2199800000	4068100000	2915200000	1956600000	3421800000
P01603	P01603		26646000	50583000	32318000	0	0	0	53885000	0	34796000	0	80774000	30986000	0	0	0	0	28226000	42064000	0	0	0	0	0	0	0	0	0	0	0	22120000	0	77617000	0	0	50845000	0	0	0	23630000	0	0	0	0	0	0	0	28320000
P01605	P01605		148830000	176130000	251390000	83144000	110250000	88657000	167960000	118620000	106180000	91677000	172830000	192220000	28468000	115260000	245360000	85455000	116460000	129380000	114620000	70437000	61252000	67999000	66043000	158290000	121230000	78808000	209970000	65066000	64218000	93058000	118320000	310720000	65615000	207940000	76117000	153890000	67582000	131180000	0	98235000	102160000	197080000	89948000	148940000	305620000	55363000	123270000
P01607	P01607		0	0	0	0	0	0	0	0	0	0	45837000	0	0	0	0	0	0	44064000	35268000	0	0	0	44899000	0	44607000	0	0	62559000	0	0	0	59873000	0	0	0	0	43055000	43952000	0	0	0	0	0	0	0	0	0
P01608	P01608		4569500000	7792900000	5278000000	3725200000	3623700000	2572900000	6572200000	3971000000	5587800000	5931400000	5946400000	5354800000	4953300000	1875200000	10110000000	2959800000	3230700000	5267500000	7582300000	7852200000	1663800000	3776600000	3371800000	7656100000	5483900000	3377600000	6088100000	6306800000	4020400000	3950900000	3384200000	16180000000	4283500000	25561000000	7637900000	11469000000	5860300000	8048600000	4081200000	10085000000	12741000000	5743000000	5420500000	9009300000	9369500000	2957300000	4835400000
P01609	P01609		0	319700000	256880000	0	0	82774000	221560000	245030000	209260000	321840000	163660000	142910000	541300000	55023000	212120000	141540000	111290000	188980000	449640000	511930000	33884000	212100000	281870000	441040000	164860000	0	411780000	248050000	141250000	394660000	97381000	654340000	207250000	1752600000	695950000	1651900000	330050000	1295800000	282940000	98315000	804960000	354120000	337030000	178240000	216150000	0	196690000
P01611	P01611		474670000	740110000	502730000	440920000	409360000	121160000	516280000	376280000	396700000	420890000	409070000	826060000	465460000	229760000	959990000	361580000	389570000	516220000	310650000	470710000	267800000	385080000	362770000	636470000	262060000	527260000	521010000	284300000	239140000	394080000	261910000	343540000	243260000	1733200000	352340000	393410000	422060000	328570000	248090000	484230000	781780000	224480000	307730000	748680000	774490000	37568000	769320000
P01612	P01612		160240000	381950000	169810000	71977000	94796000	97462000	297010000	157330000	156990000	131180000	194470000	47442000	209870000	0	257860000	0	63890000	274720000	141820000	398940000	71453000	133690000	230440000	685690000	188540000	162070000	185360000	227880000	117340000	0	0	402470000	221460000	2172200000	220740000	277110000	287030000	184440000	148240000	296620000	537050000	271680000	315950000	168680000	280430000	56368000	371780000
P01613	P01613		1851700000	2682400000	3134800000	1482800000	1560200000	1177700000	3351500000	2443400000	1584200000	2457600000	1773700000	1975100000	2344000000	530440000	4283600000	1344200000	1675400000	2699300000	2207700000	3243200000	1192800000	1559200000	2843300000	3193100000	1376200000	1475400000	2509100000	1529500000	591160000	1830200000	1442700000	3157900000	702960000	6768700000	3983300000	4321200000	3808200000	1291400000	1356600000	3327500000	5061200000	406610000	2090000000	2915000000	2920900000	611320000	2572800000
P01614	P01614		0	0	0	0	0	0	0	0	0	0	80952000	0	0	0	0	0	0	0	0	49792000	0	0	0	0	0	0	0	0	0	0	0	0	0	0	0	0	0	0	0	0	0	0	0	0	0	0	0
P01616	P01616		45487000	0	158190000	0	0	0	100320000	0	93325000	145530000	0	105720000	0	0	150680000	0	48799000	172240000	0	0	0	0	96301000	188580000	0	0	110210000	115060000	0	0	0	87943000	142210000	310050000	83629000	86356000	194420000	84040000	131760000	95733000	170450000	69207000	0	58646000	0	0	128590000
P01617	P01617		8146000000	7531200000	8169100000	4427900000	5866200000	2278000000	8774500000	4964900000	7768900000	6938700000	7149300000	7773600000	8254000000	2958800000	16407000000	7424500000	6629700000	7324500000	5765900000	10690000000	9489400000	7316700000	32750000000	14460000000	2504300000	5539800000	12372000000	7363700000	4770800000	6175500000	5925200000	9715200000	9608400000	19358000000	10863000000	8058200000	10140000000	15165000000	5814400000	2233200000	11712000000	10225000000	5733000000	5653300000	14814000000	1387400000	6881000000
P01619	P01619		110680000	111960000	145260000	83905000	65010000	71956000	188910000	131440000	225160000	336840000	125010000	159870000	149430000	114160000	171990000	78725000	125920000	77109000	291290000	186850000	61491000	127060000	135180000	156460000	90875000	113940000	123120000	177260000	63815000	99186000	101880000	526950000	74169000	344450000	193140000	174160000	134120000	115210000	139280000	191850000	116810000	58192000	81578000	195750000	209010000	63083000	103510000
P01620	P01620		95252000	97977000	147120000	69563000	72303000	0	97013000	243320000	349800000	488950000	117310000	193370000	144330000	62255000	210710000	62238000	114070000	104490000	272720000	966740000	146790000	188960000	339150000	317210000	181420000	269540000	179550000	120820000	120540000	164110000	242730000	525850000	229280000	1107700000	82515000	157260000	152790000	100040000	251960000	671370000	196320000	224080000	104280000	212140000	265990000	198870000	201840000
P01621	P01621		7579700000	13950000000	4368200000	3653200000	2438200000	4494000000	5978300000	43624000000	1025400000	777920000	534660000	4604700000	5340100000	2412400000	16609000000	2817600000	4771200000	7993100000	5574400000	812470000	2764800000	3600400000	3429600000	10066000000	6790100000	3253800000	4591000000	5638600000	5654300000	2702900000	3564900000	4694800000	3421600000	9621500000	6597300000	832340000	14446000000	8875200000	4086100000	1066900000	10248000000	6178100000	4037000000	3219300000	4192800000	1754100000	2345600000
P01622	P01622		77872000	97858000	61525000	0	32949000	0	22589000	0	0	106080000	0	0	45743000	0	43041000	0	71061000	0	119600000	119870000	66462000	0	40944000	46688000	0	0	134310000	48046000	0	45198000	33689000	242800000	67310000	100990000	54748000	110220000	60221000	113140000	85465000	0	99411000	58606000	0	37628000	27601000	0	31533000
P01624	P01624		3328400000	3542500000	1125800000	1589800000	1542800000	734480000	3307300000	14080000000	3442700000	2816600000	13408000000	2013400000	4242900000	3605200000	4001800000	881490000	2450500000	1361300000	2049500000	2215100000	1598800000	1398200000	2033600000	1037900000	1056600000	1223300000	1319900000	984440000	726550000	1443800000	2317000000	1877700000	1677000000	4004200000	2955500000	3889500000	8082000000	1460200000	2960300000	3662000000	2819000000	1433300000	3798200000	268130000	2895100000	674000000	1454700000
P01701	P01701		3513400000	7208200000	6060500000	2784000000	2870700000	1478500000	5282700000	4584700000	4216800000	6142200000	2278000000	3903800000	3934500000	2952000000	6862300000	3528400000	6429400000	4262800000	2347700000	5206000000	2712700000	4217000000	4669900000	12194000000	4821200000	4895800000	5715400000	1709900000	5055700000	1649300000	5199000000	5791600000	5859800000	6720900000	7785400000	6351500000	6175700000	6277700000	4080400000	5255800000	4602500000	3705900000	4881600000	4270500000	4084400000	1710900000	6123200000
P01707	P01707		5558400000	6164400000	3965500000	2154000000	2656000000	1492200000	4808400000	3356900000	6674400000	4186500000	2966900000	6901300000	4025700000	3279100000	4189400000	4503800000	6162400000	4313200000	12464000000	6814800000	2110600000	4416300000	5158600000	9938500000	4773500000	3311400000	2968000000	4731300000	2196600000	2095100000	2294900000	5853300000	4461600000	8695200000	9289000000	13388000000	5350800000	5289400000	4166300000	6151400000	7953200000	3603900000	4913300000	2748200000	3879300000	1728100000	5565000000
P01708	P01708		574090000	489760000	1109200000	248840000	401300000	204530000	898480000	367770000	835970000	974520000	319170000	523860000	694890000	320260000	1271600000	241870000	318380000	413450000	1489800000	793010000	203320000	884060000	1334000000	1258700000	373230000	268880000	615010000	1079600000	471610000	259430000	798800000	254560000	283810000	1505700000	473860000	974270000	644990000	429820000	652910000	506780000	1292700000	272490000	0	721780000	656220000	259510000	461690000
P01710	P01710		0	77372000	0	0	0	0	64230000	0	70292000	0	0	89593000	52951000	0	94730000	0	0	0	65049000	0	0	58845000	63798000	0	87769000	32894000	0	89300000	47364000	0	0	0	0	107200000	0	0	0	0	0	124990000	311580000	0	0	0	31727000	0	96787000
P01711	P01711		0	336370000	310440000	0	138000000	85664000	174880000	293270000	170500000	451350000	16086000	206390000	322440000	39353000	355360000	151920000	726070000	239770000	376710000	290980000	98143000	2415600000	339360000	845580000	103650000	267930000	191700000	0	238570000	0	162930000	0	0	370260000	0	0	466000000	0	0	274210000	0	452310000	324450000	205190000	157910000	0	255780000
P01714	P01714		6954500000	7014400000	5480500000	5164100000	3472500000	2065100000	6795500000	3149700000	5082400000	10369000000	3074200000	6752600000	3570100000	6380300000	10274000000	3531500000	2756000000	8378100000	4766400000	3568200000	2350200000	4309400000	5535900000	10110000000	7255700000	6799100000	5997100000	2815700000	3638400000	2395000000	4018100000	9810800000	5715700000	10801000000	9091400000	11145000000	12608000000	3377500000	4121600000	7289400000	9244000000	5712200000	5339500000	4804100000	5299900000	5036200000	3672400000
P01716	P01716		0	0	618770000	0	0	0	0	59925000	0	0	127500000	223920000	0	0	0	264520000	0	0	205650000	0	171040000	0	0	0	0	0	0	0	0	0	0	386290000	0	2222300000	0	0	0	195990000	0	121330000	428170000	0	94177000	0	0	0	0
P01717	P01717		1381700000	2409300000	1585800000	951170000	818010000	1798000000	1600600000	1602900000	1147100000	1085100000	1013900000	1499700000	1701700000	888060000	2187600000	845190000	1047600000	2039700000	1266000000	1087900000	626150000	1133100000	1749500000	3144700000	1655700000	2556000000	2548400000	586830000	1692300000	1206000000	1095600000	1496800000	1082200000	2585400000	3131400000	1641600000	1694700000	1181700000	909850000	2356600000	3660300000	970050000	953770000	1575900000	1556000000	203910000	1286200000
P01719	P01719		1413900000	1541600000	634340000	533790000	165560000	288440000	1381400000	2479700000	469430000	461100000	422560000	754730000	1670800000	185260000	679050000	250630000	746950000	1032400000	791990000	2868400000	200200000	1257000000	831280000	1077900000	403070000	1670200000	3776000000	678830000	279530000	302060000	1413500000	378300000	394980000	3438000000	1580200000	1975900000	1563200000	1075900000	983160000	1534400000	7374400000	843480000	1413300000	1194500000	725400000	178850000	185850000
P01721	P01721		0	152310000	0	0	52538000	0	0	0	495280000	45240000	0	218460000	51312000	0	90516000	0	38182000	0	75446000	0	0	0	93756000	0	0	0	0	0	0	57722000	92729000	118450000	0	986350000	135320000	284910000	554680000	0	0	0	345790000	0	0	0	125360000	0	0
P01742	P01742		1827700000	2024800000	2592100000	1512700000	1700300000	547200000	4097000000	1644700000	4768800000	4101300000	1509300000	3948600000	2467500000	1151300000	4523800000	1566500000	1241200000	2042600000	2039600000	5565000000	1009100000	2710100000	2769000000	1924400000	2775900000	4058100000	1835400000	3329800000	3451500000	1188600000	2361900000	6576700000	4027300000	10202000000	10894000000	9409800000	3817300000	5123200000	3547900000	8021600000	7194000000	1734800000	4474400000	2531000000	1547400000	1643200000	2963900000
P01743	P01743		0	190670000	118380000	0	87615000	0	175470000	0	81157000	119050000	63976000	137720000	71553000	0	139350000	0	138910000	162720000	0	70077000	43309000	175450000	140510000	196740000	65796000	94127000	0	0	52534000	53460000	0	688930000	459840000	1354600000	488310000	674180000	226160000	282340000	139620000	880010000	506000000	588460000	289120000	214760000	102620000	0	0
P01762	P01762		0	0	0	0	0	0	0	0	0	0	0	0	0	0	0	0	0	0	0	0	0	0	0	0	0	0	0	0	0	0	0	0	0	0	0	0	0	0	0	0	0	0	0	0	0	0	51891000
P01763	P01763		0	0	0	0	0	29389000	0	0	0	0	0	0	0	0	0	0	0	0	0	0	0	0	0	0	0	0	0	0	0	0	0	0	0	53318000	0	0	0	0	0	0	0	0	0	0	0	0	0
P01764	P01764	IGHV3-23	0	0	0	0	0	0	0	0	0	0	0	0	0	0	0	0	0	0	0	0	0	0	0	0	0	0	0	0	0	0	0	0	0	0	0	0	0	0	0	0	26385000	0	0	0	0	0	0
P01766	P01766		437570000	279290000	514470000	285100000	166640000	190760000	640010000	358080000	514430000	325780000	298930000	175360000	251510000	209860000	715270000	189850000	254200000	259770000	721030000	626900000	124850000	817640000	277130000	306440000	272330000	473870000	464240000	154050000	476100000	395110000	190080000	542740000	473260000	945880000	753960000	213170000	378890000	158700000	203910000	267260000	692880000	108190000	124350000	553460000	515410000	238170000	133920000
P01767	P01767		0	0	0	0	0	0	0	0	0	0	0	0	0	0	0	0	0	0	0	0	0	0	0	0	0	0	0	0	0	0	0	0	0	0	0	0	72834000	0	0	72699000	0	0	0	0	0	0	45462000
P01768	P01768		9370800000	6126900000	7991000000	5557000000	7315800000	5065800000	10612000000	6891300000	9900800000	11805000000	4053300000	11263000000	7954500000	4775400000	15069000000	4962500000	7146800000	9898500000	10196000000	9995100000	3695700000	10360000000	12349000000	16761000000	9761900000	4251800000	9342900000	6326200000	4868100000	8208500000	6394200000	16199000000	7592000000	12307000000	10149000000	12221000000	11730000000	10613000000	7636000000	10387000000	11030000000	6716100000	3357000000	10114000000	16185000000	3447400000	10069000000
P01772	P01772		3568600000	4392400000	4194800000	2029800000	3614100000	1036600000	2557300000	3159900000	4602400000	8785000000	3290600000	3398400000	5560700000	2023200000	3840300000	1859200000	2432700000	7463800000	5169400000	7356800000	2119900000	4979700000	4954600000	6933400000	5209000000	4468300000	2129700000	2598800000	5030400000	2848800000	3090800000	5251300000	12787000000	17955000000	12679000000	15392000000	9105800000	9238200000	9141400000	9069800000	11331000000	3528300000	8128300000	6485600000	5037300000	1844000000	5616500000
P01780	P01780		6533000000	7875100000	7598200000	5069400000	6630100000	2217600000	8568700000	5153800000	5872300000	8275000000	4704900000	6057200000	6049100000	4028100000	12640000000	2490700000	8456300000	5559000000	5476100000	9505800000	5490100000	6646600000	11461000000	11600000000	6119700000	5446800000	7275100000	4711700000	3305500000	3501300000	7727500000	6289400000	6838500000	9020300000	8718400000	9469200000	7519500000	5461000000	5090700000	7335400000	7734200000	7307100000	3596300000	6395500000	8952900000	2818000000	6747800000
P01782	P01782		210210000	808100000	0	101270000	318670000	158670000	620110000	139840000	0	152260000	173660000	291580000	443140000	183190000	343110000	0	181240000	0	54989000	330960000	79336000	292020000	141780000	125940000	120960000	125420000	0	169460000	93237000	56959000	156820000	0	103980000	0	0	457100000	0	0	0	0	109040000	0	0	0	188390000	0	712070000
P01814	P01814		112070000	95742000	43894000	0	0	0	61605000	0	0	0	43444000	0	0	0	0	0	87836000	0	0	0	0	0	0	55121000	0	0	0	0	0	0	0	0	0	0	0	0	58709000	0	0	0	0	0	0	58987000	49692000	0	0
P01817	P01817		66342000	0	42410000	0	0	0	0	57678000	76655000	80979000	0	0	0	44808000	0	0	64415000	0	46784000	38350000	83548000	0	103330000	96974000	50088000	0	0	0	0	0	0	230130000	0	0	93243000	96720000	0	0	0	56321000	0	0	0	0	0	0	91214000
P01824	P01824		0	29646000	24341000	0	27114000	37375000	34251000	32835000	0	0	26300000	24522000	0	0	0	0	0	35784000	35204000	27705000	0	0	0	38220000	0	0	28759000	0	34991000	29100000	24230000	0	21062000	44294000	0	57541000	41151000	28383000	18896000	36531000	0	32754000	0	35547000	18584000	0	0
P01833	P01833	PIGR	584480000	396510000	807530000	787110000	532910000	887660000	936390000	513090000	1074500000	1089100000	687520000	941020000	480360000	745940000	430170000	682540000	819010000	685970000	696120000	445050000	1137700000	447370000	720350000	625680000	524810000	964920000	460220000	708330000	571220000	896360000	234010000	2685000000	790000000	1609600000	3422500000	4346300000	1908100000	1256100000	10523000000	511690000	1235800000	1338700000	725780000	241900000	252000000	2219200000	2218700000
P01834	P01834	IGKC	140000000000	189000000000	143000000000	84136000000	104000000000	64881000000	192000000000	299000000000	142000000000	183000000000	132000000000	170000000000	139000000000	76951000000	190000000000	108000000000	134000000000	124000000000	129000000000	166000000000	92904000000	153000000000	142000000000	170000000000	124000000000	92309000000	154000000000	134000000000	91783000000	84886000000	102000000000	232000000000	108000000000	326000000000	154000000000	185000000000	173000000000	186000000000	184000000000	223000000000	225000000000	164000000000	111000000000	150000000000	172000000000	59368000000	97221000000
P01854	P01854	IGHE	0	32707000	0	0	0	0	0	0	0	48997000	11515000	0	0	73999000	0	0	0	0	0	0	0	0	0	0	0	50299000	0	0	50593000	0	56367000	33340000	43210000	0	35740000	30551000	279900000	87426000	40812000	198360000	1299200000	46122000	15007000	0	0	14175000	0
P01857	P01857	IGHG1	230000000000	347000000000	310000000000	133000000000	153000000000	105000000000	281000000000	216000000000	322000000000	247000000000	188000000000	302000000000	158000000000	142000000000	505000000000	169000000000	238000000000	291000000000	339000000000	284000000000	106000000000	202000000000	317000000000	248000000000	179000000000	208000000000	243000000000	202000000000	125000000000	188000000000	200000000000	457000000000	223000000000	682000000000	327000000000	487000000000	280000000000	291000000000	183000000000	489000000000	456000000000	344000000000	226000000000	289000000000	387000000000	124000000000	182000000000
P01859	P01859	IGHG2	94716000000	194000000000	140000000000	47888000000	92273000000	25088000000	131000000000	82071000000	134000000000	137000000000	91263000000	128000000000	161000000000	37120000000	156000000000	71619000000	68012000000	118000000000	87930000000	183000000000	44382000000	109000000000	173000000000	156000000000	84365000000	39816000000	114000000000	93515000000	26137000000	78561000000	109000000000	139000000000	123000000000	337000000000	77265000000	138000000000	118000000000	165000000000	135000000000	136000000000	225000000000	104000000000	27619000000	106000000000	226000000000	39989000000	131000000000
P01860	P01860	IGHG3	33057000000	43865000000	17812000000	27959000000	28780000000	6193200000	4508200000	34313000000	25882000000	15897000000	16557000000	11743000000	18467000000	9321400000	15657000000	30128000000	9201300000	48490000000	60603000000	23509000000	20976000000	27809000000	41984000000	35119000000	18589000000	9057100000	9671100000	32910000000	11707000000	24120000000	48436000000	38942000000	41868000000	116000000000	17947000000	60006000000	19712000000	6438700000	12932000000	84884000000	14212000000	35838000000	11218000000	5216500000	9241500000	7901500000	15414000000
P01861	P01861	IGHG4	25342000000	30348000000	84938000000	51022000000	22268000000	13348000000	37172000000	43461000000	64495000000	58472000000	44646000000	79140000000	24431000000	26895000000	96853000000	27572000000	19431000000	17879000000	40515000000	112000000000	16771000000	2665600000	18838000000	26576000000	25836000000	8745100000	60361000000	36307000000	13269000000	30062000000	23166000000	92495000000	3702800000	125000000000	27480000000	56442000000	22429000000	101000000000	18718000000	73158000000	68894000000	34082000000	11016000000	15525000000	70903000000	13796000000	63084000000
P01871	P01871	IGHM	266000000000	102000000000	234000000000	81312000000	208000000000	61528000000	228000000000	64938000000	212000000000	248000000000	117000000000	167000000000	192000000000	73886000000	85954000000	103000000000	157000000000	134000000000	167000000000	107000000000	185000000000	164000000000	327000000000	240000000000	171000000000	76545000000	123000000000	54934000000	146000000000	96339000000	138000000000	137000000000	81169000000	201000000000	90117000000	208000000000	147000000000	95160000000	139000000000	221000000000	148000000000	229000000000	144000000000	118000000000	197000000000	43223000000	137000000000
P01876	P01876	IGHA1	338000000000	502000000000	234000000000	272000000000	300000000000	269000000000	510000000000	629000000000	268000000000	408000000000	342000000000	469000000000	461000000000	275000000000	377000000000	354000000000	452000000000	327000000000	365000000000	391000000000	248000000000	367000000000	238000000000	575000000000	350000000000	350000000000	472000000000	471000000000	339000000000	279000000000	285000000000	425000000000	198000000000	467000000000	575000000000	403000000000	549000000000	409000000000	459000000000	290000000000	500000000000	255000000000	360000000000	371000000000	407000000000	698000000000	391000000000
P01877	P01877	IGHA2	36406000000	39855000000	19288000000	8358600000	4153000000	32187000000	47645000000	16138000000	16362000000	52438000000	35449000000	66709000000	46485000000	33133000000	44229000000	9430100000	36942000000	49441000000	66665000000	19642000000	9923900000	5357500000	32356000000	48149000000	19310000000	29975000000	32927000000	22791000000	25193000000	20435000000	17345000000	35184000000	8851600000	35166000000	42148000000	7599800000	111000000000	57260000000	12488000000	5258700000	62651000000	14651000000	56021000000	48183000000	69727000000	5148600000	40132000000
P01880	P01880	IGHD	1881600000	0	5195900000	811920000	281720000	2916900000	4006000000	50270000	1715100000	6535900000	609240000	9500600000	816440000	291660000	5436800000	1943000000	384680000	2171600000	640470000	3326200000	1152300000	1632000000	606810000	0	1547500000	260090000	1565100000	2236600000	716500000	5058000000	2421100000	2621000000	1682200000	3573300000	6285500000	1495500000	9243200000	29181000000	141640000	3500500000	1768600000	5735900000	58948000000	4731600000	1769200000	56094000	1572200000
P01892	P01892	HLA-A1	0	0	0	0	205300000	102660000	0	87914000	96093000	156620000	0	0	0	128480000	119970000	0	124230000	0	0	0	0	0	0	0	0	0	0	99598000	0	0	0	0	89444000	0	0	0	0	112270000	0	0	0	0	0	0	54128000	0	0
P02042	P02042	HBD	291990000	132190000	511650000	766150000	1438700000	742610000	68530000	153450000	554440000	251350000	303950000	659260000	307240000	172800000	251400000	4000800000	393940000	230310000	2023100000	1021400000	188840000	23253000	409420000	199150000	2393100000	925770000	858390000	1088700000	2144300000	1378700000	1022400000	0	37527000	1521700000	0	4582600000	347140000	19627000000	205870000	5703500000	336620000	804060000	4110300000	1484700000	1513300000	1530400000	707160000
P02144	P02144	MB	26229000	13613000	47700000	24869000	0	0	0	10808000	3596900	8516500	23540000	0	3700400	66415000	25924000	87474000	0	0	21416000	26090000	6664800	8206700	13523000	11298000	23849000	0	0	0	3457800	0	0	0	169310000	338850000	22232000	175860000	10037000000	68858000	0	7848600	1343200000	267520000	33808000	8607400000	869710000	477650000	1068700000
P02452	P02452	COL1A1	54490000	0	0	0	0	0	74592000	63010000	0	0	0	0	0	0	65801000	0	62352000	0	0	0	0	0	0	0	0	157060000	0	0	0	0	29745000	0	0	0	0	0	0	0	0	0	0	0	0	48808000	0	0	0
P02647	P02647	APOA1	803000000000	695000000000	794000000000	815000000000	830000000000	735000000000	849000000000	735000000000	743000000000	911000000000	881000000000	899000000000	906000000000	896000000000	929000000000	986000000000	805000000000	1080000000000	654000000000	979000000000	941000000000	879000000000	942000000000	928000000000	823000000000	1040000000000	840000000000	1020000000000	977000000000	834000000000	845000000000	490000000000	561000000000	395000000000	443000000000	317000000000	489000000000	699000000000	404000000000	701000000000	476000000000	506000000000	758000000000	613000000000	663000000000	681000000000	769000000000
P02649	P02649	APOE	23992000000	23982000000	29134000000	23731000000	42718000000	50237000000	23278000000	13462000000	43630000000	106000000000	28047000000	26539000000	20548000000	20121000000	19364000000	29264000000	28041000000	33141000000	27138000000	41178000000	28156000000	27071000000	26023000000	23875000000	21414000000	22718000000	21895000000	28716000000	26416000000	26660000000	20124000000	3311100000	31621000000	6340400000	14226000000	28660000000	10124000000	8956500000	30438000000	10582000000	8624200000	8960200000	11115000000	19959000000	17478000000	26040000000	19902000000
P02652	P02652	APOA2	199000000000	168000000000	163000000000	176000000000	188000000000	179000000000	157000000000	222000000000	185000000000	231000000000	194000000000	183000000000	202000000000	185000000000	185000000000	207000000000	160000000000	222000000000	193000000000	238000000000	158000000000	199000000000	165000000000	145000000000	181000000000	152000000000	163000000000	158000000000	205000000000	189000000000	147000000000	83716000000	117000000000	75952000000	94546000000	29525000000	72615000000	146000000000	71412000000	169000000000	63903000000	144000000000	140000000000	153000000000	176000000000	146000000000	157000000000
P02654	P02654	APOC1	20129000000	10096000000	17262000000	17420000000	19884000000	20384000000	21182000000	16334000000	27119000000	32586000000	25937000000	15161000000	20188000000	13816000000	12635000000	20877000000	13337000000	19475000000	12138000000	32959000000	12496000000	17118000000	18101000000	9833600000	13156000000	20441000000	19901000000	18911000000	17064000000	15771000000	14466000000	3170900000	10384000000	4518000000	3989700000	1118200000	6135700000	5060400000	5392200000	5575900000	4612800000	5545400000	7013000000	11755000000	9704700000	6800900000	12661000000
P02655	P02655	APOC2	20361000000	29042000000	23027000000	18785000000	30108000000	35245000000	21279000000	15877000000	33817000000	24801000000	27855000000	17099000000	23827000000	16923000000	10722000000	26902000000	34542000000	15735000000	17440000000	25857000000	12591000000	22004000000	30528000000	18333000000	15809000000	18106000000	29564000000	13479000000	31629000000	19864000000	20137000000	12599000000	24758000000	23716000000	23604000000	12551000000	24211000000	12091000000	20224000000	19003000000	34855000000	30139000000	8853800000	13263000000	12807000000	10198000000	15372000000
P02656	P02656	APOC3	27474000000	25569000000	20011000000	22504000000	27948000000	33842000000	21844000000	22561000000	29672000000	31142000000	24708000000	43219000000	31614000000	26692000000	15298000000	26767000000	30124000000	29516000000	35162000000	21992000000	14823000000	34618000000	28938000000	26847000000	30811000000	24592000000	48628000000	40924000000	43140000000	21309000000	32932000000	26612000000	30018000000	27611000000	32136000000	20478000000	26710000000	24763000000	23095000000	23289000000	30873000000	60587000000	18962000000	17717000000	25871000000	17141000000	24346000000
P02671	P02671	FGA	23253000000	16339000000	16197000000	13194000000	16196000000	16012000000	13498000000	30648000000	10770000000	13852000000	15561000000	18655000000	16011000000	14289000000	14765000000	20137000000	13755000000	12437000000	10350000000	17335000000	14940000000	10196000000	19456000000	17488000000	13816000000	12937000000	20108000000	23371000000	11436000000	10331000000	20226000000	67502000000	45256000000	77525000000	44265000000	59381000000	57687000000	54949000000	20215000000	33694000000	45767000000	26668000000	43785000000	60229000000	37571000000	32757000000	22736000000
P02675	P02675	FGB	120990000	43567000	133700000	10974000	168600000	26449000	216470000	552810000	26822000	47645000	14874000	50541000	0	308110000	321080000	327700000	443520000	27176000	117920000	16741000	181710000	0	181680000	314240000	87747000	33494000	238500000	817750000	19739000	101420000	222720000	2831700000	3046900000	3875100000	1834600000	2434000000	1641900000	760330000	2284000000	808780000	2915200000	1797000000	1017500000	9318400000	9094300000	3270700000	700510000
P02679	P02679	FGG	110030000	78861000	0	0	62863000	0	105710000	569580000	69264000	163610000	0	80286000	0	30765000	56176000	0	375450000	82739000	135820000	144490000	289560000	90774000	449170000	320660000	75002000	39200000	77021000	754030000	22708000	64193000	193650000	3097400000	3138100000	4432000000	1517000000	2845000000	2335100000	1635600000	3103400000	982890000	3824400000	2105900000	1079800000	10224000000	6328100000	2903000000	1013300000
P02730	P02730	SLC4A1	0	0	0	0	0	0	0	0	0	0	0	0	0	0	0	0	0	0	0	0	0	0	0	0	0	0	0	0	0	0	0	0	0	0	0	71310000	0	0	0	0	22526000	0	0	0	0	0	0
P02741	P02741	CRP	515500000	2584100	191320000	251640000	512730000	673170000	0	664990000	387730000	2140700000	211380000	799220000	16508000	0	133020000	135780000	133850000	324600000	387750000	20388000	47890000	939240000	569980000	2561700000	91723000	122300000	1987900000	73674000	79031000	14343000	678770000	11990000000	65316000000	62735000000	76854000000	43637000000	85357000000	76388000000	53802000000	41902000000	28836000000	83000000000	67736000000	19240000000	61745000000	4835500000	12156000000
P02743	P02743	APCS	32106000000	16729000000	31122000000	34550000000	30686000000	38764000000	23700000000	40488000000	39585000000	28909000000	40985000000	30658000000	36503000000	31455000000	23142000000	22051000000	25214000000	35104000000	31321000000	26114000000	27246000000	31084000000	19159000000	20843000000	26281000000	23830000000	34440000000	27686000000	22188000000	14571000000	26289000000	29042000000	37976000000	54096000000	45794000000	17933000000	32035000000	32981000000	44473000000	31672000000	33592000000	45065000000	40528000000	21096000000	23124000000	51224000000	27604000000
P02745	P02745	C1QA	1568000000	191210000	1892300000	3046600000	2630800000	1643800000	3545400000	1559700000	3611900000	2351500000	1658900000	853250000	1766700000	1339000000	730800000	1585600000	1534600000	1276600000	746070000	804310000	498360000	1785400000	691020000	909840000	820040000	327150000	773340000	398400000	843980000	721470000	771140000	668320000	1083500000	982320000	910440000	1066500000	762720000	643170000	1226400000	720120000	944970000	742310000	797100000	1223300000	649330000	1795200000	776260000
P02746	P02746	C1QB	3025800000	987610000	2055700000	3697000000	2283700000	1872200000	3948700000	2648500000	4516400000	4096200000	3320700000	1799200000	4496300000	1356000000	1135800000	1714500000	2428600000	2185500000	1476000000	3083700000	1351200000	2044600000	1535000000	1851700000	1292800000	1301100000	1341200000	1451300000	1856500000	2618700000	1187700000	2465200000	2724300000	1959300000	1983700000	2255500000	1448700000	1431800000	1934100000	1104100000	1940600000	1824200000	1326500000	1593000000	2027300000	2274400000	1197200000
P02747	P02747	C1QC	5921400000	1737200000	3720100000	7521400000	5667700000	4515400000	6637200000	4583200000	7096000000	7548200000	4395300000	2509900000	7204400000	2748500000	1912900000	2389600000	2978400000	2772400000	1810800000	2744800000	2261700000	4008600000	3147000000	2667300000	2945500000	1935100000	2706300000	2807300000	3519300000	2904900000	2610300000	4934900000	5710300000	4284300000	3138300000	3422900000	2841000000	1758300000	5986500000	2007100000	2633000000	4998300000	2444500000	2866600000	1716000000	4061500000	1234800000
P02748	P02748	C9	23435000000	29850000000	21614000000	22625000000	25833000000	28828000000	15994000000	46703000000	19929000000	28219000000	22176000000	24074000000	26479000000	16760000000	24585000000	39860000000	27815000000	29690000000	24064000000	23640000000	27712000000	38459000000	27419000000	34292000000	22096000000	18466000000	34856000000	38974000000	15967000000	25915000000	29096000000	45411000000	56708000000	55811000000	66573000000	22484000000	66480000000	53083000000	65999000000	45346000000	66029000000	57359000000	45711000000	40852000000	26409000000	54636000000	31844000000
P02749	P02749	APOH	24847000000	34074000000	30633000000	33165000000	27300000000	33151000000	25445000000	39843000000	28973000000	38291000000	33279000000	19730000000	28708000000	21422000000	26141000000	22807000000	27280000000	31522000000	25337000000	27862000000	21189000000	21578000000	20839000000	15894000000	29659000000	16996000000	19835000000	36613000000	28136000000	30589000000	18853000000	40224000000	37295000000	30353000000	24806000000	16557000000	23485000000	31116000000	31552000000	31848000000	30931000000	27640000000	33640000000	42479000000	32600000000	29899000000	45944000000
P02750	P02750	LRG1	12625000000	18759000000	15121000000	13772000000	19644000000	14018000000	15779000000	25678000000	14470000000	20748000000	13972000000	14793000000	11185000000	18131000000	12647000000	18332000000	14564000000	13617000000	15001000000	13369000000	21228000000	24284000000	21534000000	31386000000	15789000000	12544000000	17603000000	17018000000	13107000000	15402000000	20351000000	53506000000	66352000000	59903000000	82408000000	35434000000	96355000000	79462000000	67759000000	70873000000	67682000000	77973000000	92830000000	45818000000	51315000000	28339000000	23142000000
P02751	P02751	FN1	105000000000	98152000000	109000000000	85361000000	85524000000	109000000000	90424000000	69475000000	103000000000	132000000000	110000000000	108000000000	98293000000	91579000000	118000000000	64394000000	107000000000	67958000000	116000000000	89667000000	92225000000	96321000000	104000000000	86245000000	100000000000	130000000000	73338000000	65227000000	94649000000	112000000000	104000000000	26348000000	30320000000	15111000000	30581000000	5573900000	38828000000	3626200000	40002000000	15212000000	23448000000	33564000000	15280000000	65038000000	72273000000	71728000000	91280000000
P02753	P02753	RBP4	14327000000	19412000000	15766000000	13533000000	12981000000	14828000000	16223000000	23064000000	16658000000	20212000000	13702000000	13258000000	11101000000	13368000000	13176000000	12135000000	12000000000	11509000000	18516000000	20444000000	12648000000	13768000000	11532000000	14810000000	16781000000	12588000000	11810000000	13169000000	23570000000	13892000000	15097000000	30616000000	7772300000	11226000000	16689000000	6378400000	7721000000	4482400000	5085500000	14271000000	7754000000	5871200000	12171000000	16147000000	6801300000	9492600000	8771400000
P02760	P02760	AMBP	41135000000	46032000000	45123000000	58948000000	58850000000	50579000000	64574000000	94345000000	34800000000	38812000000	50859000000	41284000000	42810000000	48492000000	54994000000	58546000000	58814000000	39585000000	31430000000	34357000000	41045000000	33556000000	42310000000	67646000000	50279000000	36552000000	51042000000	54460000000	41497000000	40462000000	46949000000	116000000000	42035000000	66157000000	65309000000	27822000000	80008000000	40018000000	26167000000	29356000000	73437000000	36486000000	52668000000	52937000000	53566000000	49795000000	64797000000
P02763	P02763	ORM1	157000000000	197000000000	166000000000	181000000000	184000000000	208000000000	165000000000	274000000000	186000000000	242000000000	159000000000	152000000000	162000000000	168000000000	164000000000	187000000000	192000000000	132000000000	193000000000	146000000000	170000000000	182000000000	180000000000	204000000000	206000000000	150000000000	193000000000	169000000000	199000000000	149000000000	182000000000	353000000000	251000000000	396000000000	345000000000	295000000000	338000000000	388000000000	373000000000	315000000000	345000000000	334000000000	360000000000	243000000000	252000000000	307000000000	175000000000
P02765	P02765	AHSG	177000000000	120000000000	152000000000	107000000000	120000000000	146000000000	173000000000	68604000000	133000000000	124000000000	113000000000	158000000000	141000000000	148000000000	139000000000	174000000000	103000000000	171000000000	121000000000	125000000000	126000000000	128000000000	84376000000	113000000000	123000000000	128000000000	78381000000	64892000000	108000000000	104000000000	106000000000	54831000000	45744000000	35068000000	50596000000	62676000000	47526000000	79346000000	62058000000	82937000000	51714000000	71238000000	78849000000	112000000000	89281000000	55399000000	111000000000
P02766	P02766	TTR	170000000000	204000000000	175000000000	170000000000	140000000000	190000000000	177000000000	114000000000	190000000000	199000000000	186000000000	150000000000	182000000000	154000000000	158000000000	135000000000	164000000000	204000000000	186000000000	208000000000	163000000000	169000000000	126000000000	194000000000	191000000000	211000000000	132000000000	194000000000	235000000000	170000000000	169000000000	152000000000	61333000000	57748000000	111000000000	53612000000	60246000000	57747000000	56185000000	130000000000	61336000000	44833000000	118000000000	114000000000	104000000000	108000000000	155000000000
P02774	P02774	GC	339000000000	305000000000	303000000000	302000000000	295000000000	338000000000	352000000000	336000000000	327000000000	310000000000	369000000000	260000000000	314000000000	339000000000	319000000000	267000000000	279000000000	338000000000	289000000000	266000000000	356000000000	330000000000	317000000000	331000000000	286000000000	314000000000	260000000000	275000000000	189000000000	352000000000	300000000000	307000000000	251000000000	257000000000	308000000000	157000000000	281000000000	284000000000	308000000000	322000000000	261000000000	271000000000	318000000000	261000000000	296000000000	267000000000	294000000000
P02775	P02775	PPBP	466540000	2291700000	727690000	890770000	385530000	1375000000	721180000	1195600000	1000700000	916870000	1123000000	328320000	1711800000	555100000	2395300000	917630000	566580000	514850000	1097400000	840540000	596030000	887330000	1362400000	703580000	1101700000	497050000	313530000	801190000	337250000	1185100000	488820000	0	226610000	587660000	122770000	187160000	2040800000	453500000	1106300000	1536300000	0	352800000	1302800000	3693400000	509130000	966110000	1085200000
P02776	P02776	PF4	280360000	273370000	292160000	406840000	289560000	312230000	349080000	222820000	456220000	256490000	389640000	336400000	352460000	282600000	417110000	254630000	381380000	199930000	318120000	385400000	405930000	306570000	397460000	649360000	642030000	321090000	274270000	334450000	292210000	351380000	496820000	0	243110000	998350000	161290000	293410000	616500000	1477000000	373000000	1161900000	114490000	221230000	399590000	1400900000	398170000	776630000	1086500000
P02786	P02786	TFRC	985510000	778720000	951100000	645670000	911640000	878330000	641920000	866850000	708890000	818180000	890670000	626890000	1382300000	810410000	639950000	1344400000	943550000	1210800000	853610000	976140000	1026200000	1980500000	1440000000	878290000	763180000	899890000	1055400000	1110000000	1365100000	723060000	1455400000	47585000	852220000	605120000	1088300000	1314200000	262930000	1228900000	721560000	832510000	170940000	896910000	774250000	766020000	635280000	664260000	744940000
P02787	P02787	TF	1560000000000	1490000000000	1540000000000	1430000000000	1400000000000	1500000000000	1520000000000	1210000000000	1480000000000	1290000000000	1540000000000	1590000000000	1480000000000	1780000000000	1670000000000	1930000000000	1560000000000	1630000000000	1620000000000	1870000000000	1540000000000	1820000000000	1300000000000	1700000000000	1420000000000	1470000000000	1490000000000	1680000000000	1600000000000	1450000000000	1490000000000	1290000000000	1110000000000	853000000000	1220000000000	1170000000000	957000000000	1350000000000	1200000000000	1290000000000	1210000000000	1200000000000	1430000000000	1140000000000	1260000000000	873000000000	1190000000000
P02792	P02792	FTL	0	0	11911000	0	0	0	0	0	0	5204800	0	0	54746000	0	23429000	50696000	0	0	0	0	0	0	0	0	0	0	5036300	0	0	0	0	170180000	0	17177000	103360000	168920000	0	0	88054000	15584000	72369000	14977000	41827000	0	0	52696000	119120000
P02794	P02794	FTH1	0	0	22556000	22949000	27639000	0	0	0	0	0	21183000	17511000	20805000	0	0	21156000	18903000	18801000	0	0	28583000	15028000	20740000	0	33823000	0	0	30906000	21457000	17711000	0	0	0	0	0	0	0	0	31949000	0	0	0	0	12267000	0	0	17358000
P80297	P80297	MT1X	0	0	0	0	0	0	0	0	0	0	0	0	0	0	0	0	0	0	0	0	0	0	0	0	0	0	0	0	0	0	0	64308000	0	0	0	0	43958000	0	0	0	0	0	0	31358000	0	0	27723000
P02810	P02810	PRH1	0	0	0	0	0	0	0	0	0	0	0	0	0	0	0	0	0	0	0	0	0	0	0	0	0	0	0	0	0	0	0	0	0	94933000	0	308130000	101160000	0	0	0	0	0	0	0	0	0	0
P03951	P03951	F11	216690000	1409000000	280230000	362160000	579950000	328930000	214770000	289450000	398790000	1433900000	354640000	563930000	208860000	268040000	487720000	0	316420000	558760000	480830000	497250000	370690000	514680000	646210000	202270000	395890000	218400000	416590000	393930000	417590000	967160000	373240000	764020000	544770000	850140000	900120000	499680000	940890000	788290000	1141300000	963040000	777790000	485090000	0	1464500000	262580000	763240000	510720000
P03952	P03952	KLKB1	10629000000	14159000000	11146000000	10502000000	11255000000	9944100000	13417000000	10017000000	9340700000	15540000000	17383000000	8151000000	11282000000	9984200000	15156000000	8882700000	12697000000	9367000000	11182000000	14221000000	17417000000	8483400000	14860000000	11100000000	16063000000	11874000000	9919600000	9086900000	14195000000	16053000000	14073000000	8050400000	10100000000	6146700000	9287600000	2345700000	8534400000	6249900000	9604200000	7923500000	8597400000	10572000000	9241800000	13832000000	11364000000	9596600000	11121000000
P04003	P04003	C4BPA	55714000000	52771000000	56181000000	57691000000	75845000000	53578000000	53796000000	57309000000	57752000000	85156000000	62089000000	46200000000	43756000000	44055000000	45892000000	34738000000	56106000000	44047000000	72977000000	42873000000	52203000000	46833000000	59099000000	38065000000	66895000000	32670000000	64093000000	48898000000	53205000000	76854000000	51324000000	47342000000	79854000000	47672000000	50405000000	25494000000	70494000000	45574000000	73461000000	53811000000	56560000000	87782000000	59190000000	65157000000	58292000000	82697000000	59885000000
P04004	P04004	VTN	46537000000	44566000000	38440000000	48031000000	45489000000	52766000000	47394000000	27222000000	43100000000	38007000000	49197000000	29126000000	43233000000	46513000000	55437000000	40519000000	44240000000	54247000000	50048000000	33937000000	56831000000	54847000000	45124000000	59724000000	40463000000	52053000000	33407000000	37680000000	47837000000	43486000000	40136000000	27463000000	52561000000	23087000000	39791000000	12555000000	51240000000	53040000000	52628000000	35131000000	35128000000	53290000000	40455000000	32503000000	48269000000	40360000000	47165000000
P04040	P04040	CAT	0	127360000	0	56225000	56789000	0	96879000	0	0	85165000	68080000	95670000	89877000	0	62337000	57975000	84269000	0	0	1958700000	67917000	52446000	0	64717000	0	0	67566000	1164200000	103590000	45237000	0	646750000	0	154270000	0	0	0	593160000	65020000	140950000	175790000	0	58192000	0	75658000	199080000	1454300000
P04066	P04066	FUCA1	25850000	0	23653000	18914000	0	19211000	0	0	0	0	0	0	0	23795000	44729000	0	0	0	0	0	53168000	48652000	0	0	0	0	0	0	0	0	0	0	16175000	0	33344000	0	19885000	0	0	0	34519000	0	0	19645000	0	21092000	25676000
P04070	P04070	PROC	1952700000	2827100000	2315800000	2918300000	2548400000	2621900000	2446300000	1595600000	2256100000	2357200000	2560300000	2085800000	2116200000	2491000000	1797000000	2086500000	3166300000	2734300000	1705700000	2126700000	3475500000	2353600000	2610000000	2570000000	2491900000	2554400000	2242300000	2100300000	2496500000	2005400000	2582300000	1867100000	1027800000	428490000	613480000	772350000	943190000	1039800000	846030000	1965700000	1135100000	1582500000	1077800000	1096600000	776930000	1210100000	1601600000
P04075	P04075	ALDOA	351300000	656020000	277990000	275680000	209580000	332040000	191360000	328870000	360470000	636190000	57458000	356250000	423470000	178590000	558420000	452070000	446830000	339790000	548630000	578100000	244220000	388880000	248230000	247170000	355740000	268160000	177620000	259580000	335020000	470030000	291050000	470560000	85334000	339050000	0	469550000	380350000	0	0	777810000	452390000	212150000	530400000	196590000	225670000	0	448740000
P04080	P04080	CSTB	0	0	0	0	0	0	0	0	0	0	0	0	0	0	0	0	0	0	0	0	0	0	0	0	0	0	0	0	0	0	0	185970000	0	112870000	127340000	67147000	79628000	174620000	0	0	95775000	0	0	74660000	0	0	0
P04114	P04114	APOB	178000000000	142000000000	300000000000	305000000000	156000000000	206000000000	228000000000	175000000000	295000000000	142000000000	174000000000	403000000000	225000000000	87496000000	132000000000	142000000000	262000000000	198000000000	199000000000	143000000000	115000000000	158000000000	213000000000	67680000000	250000000000	102000000000	193000000000	160000000000	216000000000	117000000000	166000000000	104000000000	494000000000	154000000000	97272000000	387000000000	72085000000	91613000000	139000000000	164000000000	45118000000	130000000000	76673000000	103000000000	95613000000	181000000000	185000000000
P04156	P04156	PRNP	0	0	0	0	0	0	0	0	0	0	0	0	0	0	0	0	0	0	0	0	0	0	0	0	0	0	49805000	0	0	0	0	0	0	0	0	0	0	0	0	0	0	0	0	0	0	0	0
P04179	P04179	SOD2	0	0	0	0	0	0	0	0	0	0	0	0	0	0	0	0	0	0	6937100	0	41896000	0	0	0	0	0	0	0	0	0	0	520700000	0	12744000	29525000	0	0	0	22098000	0	0	7731200	0	12596000	0	21029000	102390000
P04180	P04180	LCAT	2097400000	2213200000	1854900000	1861200000	2061700000	1685300000	2377500000	1487300000	1699600000	1612500000	2218700000	1569100000	1972100000	2106500000	2220600000	1505900000	1587700000	2259600000	1629000000	1996000000	2536000000	1891600000	1913900000	1814900000	1912400000	1936600000	1282300000	1909100000	1907500000	1596500000	2151400000	1070200000	1217800000	345880000	994830000	304720000	835250000	1031700000	887840000	1696200000	1245600000	1170800000	1781600000	1376800000	1333300000	1336200000	1393000000
P04196	P04196	HRG	25597000000	37196000000	55670000000	43414000000	50370000000	56397000000	53247000000	32185000000	35508000000	31839000000	62353000000	26692000000	52062000000	40545000000	58537000000	78459000000	39788000000	40242000000	49333000000	61450000000	65044000000	88085000000	40260000000	25802000000	42485000000	39062000000	33052000000	41070000000	45876000000	35243000000	53343000000	32700000000	43902000000	17279000000	28885000000	20992000000	19727000000	55846000000	53238000000	49610000000	23223000000	10496000000	39060000000	45631000000	57205000000	28551000000	65381000000
P04206	P04206		10150000000	19751000000	17462000000	9816900000	12164000000	5042000000	12292000000	9822200000	14445000000	21522000000	12253000000	16918000000	10868000000	10574000000	21376000000	9967900000	10713000000	7301900000	16163000000	16631000000	8253000000	12829000000	12641000000	14580000000	11545000000	8488500000	8097300000	9481700000	9737300000	7302200000	9388200000	22060000000	12342000000	36084000000	22880000000	19218000000	14911000000	15461000000	15289000000	25319000000	29888000000	12024000000	12403000000	12276000000	17613000000	7016000000	12081000000
P04207	P04207		475760000	1172700000	522150000	438290000	492720000	329780000	643650000	827850000	489170000	549120000	656340000	893830000	498300000	389220000	1622100000	496270000	630890000	157250000	293210000	204950000	432050000	688990000	479820000	651750000	349980000	254380000	417530000	371350000	503070000	539310000	389570000	817220000	223230000	829350000	409130000	207370000	1089100000	364760000	128000000	796140000	440270000	369950000	448930000	566780000	647690000	276610000	413050000
P04208	P04208		3449100000	5623700000	2208300000	1291100000	3279500000	2156200000	3624800000	2417300000	4225800000	5720600000	2378900000	8532300000	5526600000	2547600000	5474300000	2499900000	3359800000	4881300000	6203900000	5983200000	1129900000	1795300000	10753000000	5522200000	1847400000	3920100000	9557900000	7647100000	2944900000	1913700000	2164000000	5514100000	3043400000	9314600000	3917100000	4248800000	2655700000	2455300000	2331000000	3772200000	6022200000	1984100000	4881700000	3669800000	6600900000	1289200000	5820900000
P04209	P04209		348520000	253550000	0	67709000	213200000	0	174930000	695510000	190900000	255230000	281330000	967860000	536240000	0	0	128210000	434890000	0	122050000	543730000	0	121750000	0	60820000	144580000	202310000	376480000	164260000	376940000	0	496320000	118510000	0	342860000	454540000	155940000	147400000	390500000	105070000	0	429840000	76974000	49450000	251130000	182790000	0	512210000
P04211	P04211		3660300000	9553200000	5208300000	2337700000	5238400000	1448200000	2926500000	2760100000	4284100000	6234500000	3074000000	2419400000	4926700000	2403300000	3273600000	1533800000	5259300000	4675800000	3830400000	5889900000	2277500000	4306700000	3797100000	3960800000	3134400000	2035700000	3947700000	1454200000	2251100000	2325400000	4608700000	2705100000	3497100000	7598400000	5712900000	4449100000	5503100000	2593900000	9561700000	6494000000	5693100000	1048800000	3051800000	2928400000	4924100000	1218600000	5154400000
P04217	P04217	A1BG	111000000000	116000000000	109000000000	101000000000	139000000000	128000000000	113000000000	110000000000	109000000000	121000000000	105000000000	107000000000	95903000000	132000000000	92460000000	129000000000	132000000000	109000000000	120000000000	82097000000	137000000000	132000000000	131000000000	131000000000	109000000000	134000000000	107000000000	116000000000	131000000000	123000000000	123000000000	135000000000	88291000000	91836000000	101000000000	100000000000	123000000000	118000000000	88646000000	138000000000	153000000000	122000000000	135000000000	120000000000	84295000000	82638000000	126000000000
P04220	P04220		30384000000	6862200000	23696000000	9025500000	13157000000	2406600000	9744200000	8746800000	18430000000	16172000000	6014000000	10025000000	14271000000	6716100000	10875000000	5945600000	14604000000	10031000000	18676000000	6665100000	11583000000	13575000000	27527000000	20621000000	26489000000	10693000000	8778400000	10265000000	7765900000	7811100000	9378400000	11046000000	11112000000	20681000000	6985200000	14342000000	11193000000	6355400000	8542300000	18746000000	14652000000	10921000000	5981100000	11179000000	14767000000	4146700000	13778000000
P04275	P04275	VWF	5266100000	3167800000	2863600000	3303500000	1939000000	5829300000	2701200000	4678500000	4811700000	5565100000	4457100000	6290100000	4595100000	5971800000	3039300000	4901900000	3546100000	2317600000	4709900000	2847300000	3295700000	4141700000	3415000000	4607300000	3409000000	8246900000	4423000000	5361400000	4464900000	6019700000	4061900000	7498700000	10806000000	15986000000	11680000000	32978000000	9389600000	5194400000	9980400000	4822500000	9301000000	14990000000	8944100000	19357000000	24380000000	26817000000	15739000000
P04278	P04278	SHBG	1790900000	2744900000	3891100000	1904800000	1004400000	3329700000	2791100000	1380100000	2386400000	3605200000	2687000000	2613400000	2071400000	2335300000	1470300000	2360700000	3057800000	3868300000	980300000	2760900000	5211900000	1875900000	2269900000	4190500000	2296500000	5877600000	1524300000	3683000000	2615400000	4696600000	1577900000	1108300000	860640000	2264100000	2471000000	3896600000	2411100000	3279100000	1140600000	2958400000	3385600000	651200000	2619300000	1603600000	1891400000	945320000	769750000
P04406	P04406	GAPDH	31903000	29629000	57662000	10605000	91713000	24266000	46474000	60495000	49399000	0	82730000	54199000	48532000	17650000	62540000	0	52046000	50636000	131960000	116630000	380940000	63367000	0	23961000	40342000	66058000	64467000	0	47807000	26885000	42535000	73848000	0	179600000	0	242440000	211290000	1135500000	0	663090000	0	29009000	88779000	440930000	481220000	149070000	232480000
P04424	P04424	ASL	0	0	0	0	0	0	0	0	29432000	0	0	70473000	0	0	0	0	35882000	0	0	0	0	0	0	34371000	0	0	0	0	55078000	0	0	52392000	0	0	0	0	0	0	0	0	0	0	0	0	0	0	157340000
P04430	P04430		419200000	263310000	191370000	97172000	149990000	85162000	951280000	258010000	277250000	283970000	245970000	279320000	263090000	198700000	573450000	306070000	173390000	319500000	371010000	461760000	0	129090000	0	313410000	240170000	102660000	315170000	236660000	132890000	165310000	106950000	272260000	53291000	412140000	358030000	361340000	489530000	116510000	90517000	381230000	588360000	178730000	132810000	409840000	742120000	91050000	438200000
P04431	P04431		237240000	207110000	114320000	144370000	82331000	0	112820000	0	117420000	145650000	71014000	0	150450000	0	234760000	0	199040000	303220000	0	324290000	203840000	230120000	138360000	580610000	547110000	143100000	159520000	126650000	232640000	664890000	150060000	95854000	203600000	376930000	452510000	385320000	214890000	444170000	124930000	264370000	322700000	0	0	249910000	325340000	126490000	148670000
P04432	P04432		0	0	0	0	0	0	0	0	0	0	0	54440000	0	0	0	0	0	0	0	0	42162000	0	0	0	131380000	0	34686000	0	0	0	0	0	0	0	0	0	0	0	0	0	0	0	0	0	0	0	26164000
P04433	P04433		8304200000	12479000000	7498800000	5410600000	5109900000	2358700000	11967000000	8209500000	5940700000	14892000000	6406800000	12135000000	9114900000	4477500000	14719000000	4659000000	6808900000	7813600000	11900000000	6719500000	7918100000	12545000000	7731600000	10406000000	9348900000	8067800000	9752700000	5801100000	7921300000	6927900000	8982200000	5776500000	6680100000	19382000000	18908000000	8964400000	11521000000	10655000000	10021000000	18152000000	14260000000	7226800000	5682400000	8254800000	6400500000	7700300000	8782500000
P04434	P04434		0	0	0	0	0	0	0	0	0	0	0	0	0	0	0	0	0	0	0	0	0	0	0	0	0	0	0	0	0	56997000	0	0	0	0	0	0	0	0	0	0	0	0	0	0	0	0	0
P04746	P04746	AMY2A	36510000	152620000	78656000	0	52897000	27420000	76897000	921060000	36837000	52682000	79346000	158650000	53174000	20273000	21873000	61073000	17409000	81579000	11535000	49461000	106020000	0	0	25901000	0	14647000	43228000	0	34870000	87540000	22366000	0	0	0	0	55593000	11245000	17876000	0	0	35505000	23645000	0	126100000	707910000	48338000	76851000
P04792	P04792	HSPB1	0	0	0	0	0	0	119010000	0	0	0	0	0	0	0	0	0	0	0	0	0	0	0	0	0	0	0	0	0	0	0	0	0	0	0	0	0	0	0	0	0	0	0	0	0	0	0	0
Q99878	Q99878	HIST1H2AJ	0	0	0	0	0	0	0	0	0	0	0	0	0	0	0	0	0	0	0	0	0	0	0	0	0	0	0	0	0	0	0	0	0	0	0	0	0	0	0	0	0	0	0	0	0	0	0
P05019	P05019	IGF1	0	65598000	0	31788000	0	0	0	0	0	0	0	0	23123000	0	0	0	0	0	0	0	25410000	0	0	0	0	0	0	0	0	0	0	0	30215000	0	0	0	0	26255000	0	0	0	0	0	39041000	0	0	0
P05062	P05062	ALDOB	13250000	0	68743000	162170000	16335000	103530000	37174000	0	12989000	0	26107000	0	67878000	20205000	0	12446000	0	29386000	6266800	0	19432000	53070000	22484000	15618000	15311000	41411000	21007000	120660000	45258000	18048000	15830000	1811700000	0	203060000	5930100	410800000	0	0	231400000	27564000	54336000	102900000	0	137020000	5389900	0	9577900000
P05089	P05089	ARG1	0	0	0	0	0	0	0	0	0	0	0	0	0	0	0	0	0	0	0	0	0	0	0	0	0	0	0	0	0	0	0	0	0	0	0	0	0	0	0	0	0	0	0	0	0	0	0
P05090	P05090	APOD	26375000000	26624000000	32467000000	23958000000	21583000000	27376000000	26398000000	21840000000	19536000000	11825000000	28640000000	37275000000	23501000000	32246000000	17481000000	29545000000	18876000000	25605000000	16104000000	25995000000	28507000000	23074000000	17794000000	13367000000	12323000000	21065000000	29337000000	27257000000	18366000000	17831000000	13690000000	18955000000	11631000000	19739000000	11517000000	24321000000	13549000000	19164000000	12499000000	13910000000	30306000000	15860000000	26934000000	20838000000	15945000000	14724000000	24823000000
P05091	P05091	ALDH2	0	0	34121000	0	0	0	0	32590000	0	0	0	0	0	48263000	0	0	0	0	0	0	0	0	0	0	43212000	0	0	0	0	0	0	0	40945000	0	0	13859000	51617000	0	0	0	0	0	0	36250000	0	0	0
P05109	P05109	S100A8	124100000	201690000	91591000	31601000	414180000	17535000	18999000	38614000	67667000	73193000	5302800	100220000	18455000	94998000	88691000	61740000	281310000	0	516290000	16762000	0	14937000	22505000	275570000	45580000	0	320760000	47315000	10396000	112480000	173270000	6543500000	1576100000	11672000000	3085600000	1873700000	3266500000	3977500000	2151700000	12157000000	2627100000	3458100000	1734000000	1487800000	3024400000	1158300000	1283400000
P05121	P05121	SERPINE1	0	0	0	0	0	0	0	0	0	56685000	0	0	0	0	0	0	176700000	252400000	39615000	0	0	0	0	0	0	0	70120000	0	0	0	58059000	0	0	0	0	0	0	0	0	0	0	38690000	32903000	273930000	30765000	0	19938000
P05154	P05154	SERPINA5	0	98658000	78542000	74987000	31775000	80774000	64596000	62221000	113350000	77290000	97262000	0	0	39097000	101160000	0	77194000	121230000	61509000	90826000	68988000	71195000	58312000	44475000	150540000	94036000	0	81432000	133240000	70326000	0	0	38795000	0	0	0	0	195810000	0	104090000	0	117320000	0	104290000	56688000	69642000	58023000
P05155	P05155	SERPING1	76137000000	78039000000	75905000000	95198000000	92412000000	93039000000	85953000000	111000000000	67358000000	63518000000	81302000000	70131000000	86921000000	96513000000	78617000000	78237000000	89165000000	66200000000	78781000000	66931000000	131000000000	61900000000	89665000000	97542000000	84045000000	98454000000	84882000000	89195000000	78741000000	82995000000	76762000000	105000000000	95508000000	109000000000	103000000000	134000000000	118000000000	124000000000	150000000000	66217000000	127000000000	118000000000	90748000000	68960000000	60723000000	104000000000	94764000000
P05156	P05156	CFI	32082000000	26494000000	26454000000	29667000000	33212000000	32910000000	27542000000	33271000000	24977000000	26099000000	33282000000	20753000000	27228000000	28681000000	36229000000	24521000000	37647000000	27732000000	33489000000	26196000000	29232000000	36634000000	30143000000	27488000000	28621000000	29006000000	24619000000	28383000000	26524000000	25485000000	28884000000	32572000000	25238000000	24690000000	32500000000	14254000000	36017000000	26301000000	29486000000	29549000000	29364000000	40012000000	27712000000	24005000000	25602000000	33264000000	29644000000
P05160	P05160	F13B	4240400000	5228300000	3928500000	5336400000	4729700000	3684400000	5284100000	5216100000	4505400000	5208600000	5176500000	4506400000	3936800000	3988800000	3126000000	3916500000	3511200000	4060600000	4158900000	4473100000	4277500000	3267200000	3323000000	3858900000	4802100000	3979900000	3657100000	5033700000	4905400000	3802400000	3086500000	6525000000	4789000000	4254100000	5189900000	2878800000	4360800000	3376900000	4224500000	5072300000	3678400000	2888600000	4063600000	4491600000	3548900000	3157400000	4107500000
P05164	P05164	MPO	0	0	0	0	0	0	0	0	0	0	0	309690000	0	0	0	0	0	0	0	0	0	0	0	0	0	0	0	0	0	0	0	0	458590000	568520000	143960000	317360000	0	246720000	461800000	318670000	414990000	539760000	561620000	0	217240000	0	250150000
P05362	P05362	ICAM1	77251000	115720000	109690000	111900000	118560000	169360000	80874000	129290000	67870000	59269000	74782000	185270000	112890000	39524000	62610000	126360000	46577000	215160000	94654000	98193000	89248000	99811000	35990000	43928000	0	136040000	139890000	76777000	117690000	57471000	59599000	310890000	166420000	171270000	374160000	1235700000	286650000	243110000	2246300000	206830000	266430000	175370000	195160000	126350000	112120000	158350000	319020000
P05386	P05386	RPLP1	0	0	0	0	0	0	0	0	0	0	0	0	0	0	0	0	0	0	0	0	0	0	0	0	0	0	0	0	0	0	0	0	0	0	0	0	0	0	0	0	0	0	0	0	0	0	0
P05387	P05387	RPLP2	0	0	0	0	0	0	0	0	0	0	0	0	0	0	0	0	0	0	0	0	0	0	0	0	0	0	0	0	0	0	0	0	0	0	0	0	0	0	0	0	0	0	0	0	0	0	0
P05413	P05413	FABP3	0	0	0	0	0	0	0	0	0	0	0	0	0	0	0	0	0	0	0	64164000	0	0	0	0	0	53432000	0	0	0	0	0	0	0	0	0	0	272100000	0	0	0	0	0	0	190830000	0	0	0
P05451	P05451	REG1A	0	46210000	33937000	0	0	0	0	0	0	0	0	0	0	0	0	0	0	0	0	0	0	0	0	33123000	0	88776000	0	798980000	0	0	0	681420000	0	503020000	0	401680000	147650000	0	0	50958000	104200000	175000000	631630000	263790000	286760000	0	408510000
P05452	P05452	CLEC3B	3293400000	3631800000	4245600000	3689000000	3823300000	3101500000	3368300000	2790500000	3196200000	5516700000	4338900000	3191600000	4532300000	4404700000	3040900000	4024000000	3018100000	4404400000	4613700000	4544500000	4103200000	3089000000	2689100000	2837600000	3757800000	3322800000	2313300000	3697300000	3600600000	3641800000	4044900000	2694500000	2686800000	3021600000	2304600000	4196300000	2574900000	3649700000	3674500000	3780300000	2035500000	4073700000	2041500000	3038700000	3167100000	1981600000	3085700000
P05534	P05534	HLA-A2	30140000	103160000	166670000	1131900000	225250000	69663000	498730000	0	259010000	223860000	0	100950000	85675000	825040000	313650000	0	0	0	160970000	0	0	0	60781000	592360000	0	0	0	0	238330000	0	71045000	35903000	0	525220000	0	980420000	86949000	544800000	395310000	342270000	60608000	0	0	571300000	0	0	0
P05543	P05543	SERPINA7	7411000000	7238400000	6371000000	7742000000	7324100000	7265000000	7518700000	7179100000	4694400000	3872700000	6860100000	4821900000	4368700000	8369800000	7306600000	5995400000	6393200000	9903800000	5768200000	6945300000	8254500000	5315600000	6098600000	8954400000	7047800000	7229000000	6451700000	6917900000	5505000000	7108700000	6545400000	4751800000	4896100000	2793400000	4712000000	10635000000	5171200000	6473600000	5290100000	4287200000	5603500000	4278900000	6004200000	4098200000	6221300000	6613000000	5824600000
P05546	P05546	SERPIND1	42196000000	73337000000	57626000000	67708000000	67080000000	52456000000	50559000000	55229000000	53278000000	45988000000	48483000000	34750000000	43902000000	48303000000	50700000000	59831000000	63835000000	57300000000	50377000000	50977000000	65930000000	63437000000	58695000000	49097000000	48363000000	68981000000	44060000000	55391000000	53995000000	48297000000	61394000000	36559000000	32714000000	18883000000	37689000000	5771800000	35154000000	19765000000	52012000000	42352000000	12398000000	23127000000	40045000000	41649000000	31330000000	38084000000	46092000000
P05976	P05976	MYL1	8090100000	1634500000	15894000000	14699000000	12178000000	12651000000	0	14781000000	6113900000	14173000000	8501000000	15237000000	0	0	0	0	660090000	0	14650000000	10874000000	16463000000	12232000000	730280000	907080000	0	0	9123600000	0	14144000000	686320000	628720000	7498400000	6656600000	9145100000	10871000000	4641200000	16731000000	7644700000	13642000000	4792800000	4808300000	7800600000	0	0	8526400000	0	5529200000
P06276	P06276	BCHE	1539300000	1997700000	1618800000	3038400000	2162900000	1901400000	2639000000	1803600000	2368700000	2700100000	2056700000	1708700000	2694400000	1850000000	2280900000	1590500000	2001300000	2035900000	2705300000	2270400000	2699400000	1454900000	1995600000	1823100000	2051500000	2074900000	1328300000	2510200000	1502100000	1612700000	2123700000	1245000000	1414700000	541310000	1061500000	0	967620000	325730000	890030000	1608800000	865080000	1616100000	912430000	1104300000	1494700000	1699700000	1479000000
P06309	P06309		0	0	54216000	0	0	0	0	0	0	0	0	0	0	0	0	0	0	0	0	0	0	0	0	0	0	0	0	0	0	0	0	0	0	0	0	0	0	0	0	0	0	0	0	0	0	0	0
P06310	P06310		13223000000	27826000000	13640000000	8887500000	11914000000	4976400000	22793000000	12866000000	29948000000	23206000000	17499000000	19665000000	29683000000	11959000000	15720000000	10233000000	11606000000	18915000000	11049000000	17839000000	11405000000	16964000000	21739000000	18381000000	13133000000	8099900000	18917000000	11287000000	9256900000	10135000000	15076000000	14029000000	7033200000	21093000000	14194000000	13641000000	17524000000	13490000000	13339000000	12393000000	20421000000	8575700000	7131700000	16800000000	21253000000	7243800000	11843000000
P06311	P06311		130760000	373250000	105130000	93508000	0	0	196360000	1010200000	178840000	185750000	151840000	229250000	242000000	0	500340000	0	184070000	99730000	276190000	265080000	64848000	186180000	174210000	206150000	331100000	97608000	230620000	0	79730000	83082000	66504000	475320000	139420000	404000000	400430000	351970000	289570000	176760000	246730000	614200000	302510000	153760000	151280000	202220000	218730000	0	159220000
P06312	P06312	IGKV4-1	6395100000	5802700000	7474000000	3086500000	4267800000	2028700000	8100600000	2625800000	4466500000	8763600000	3394600000	9558700000	10926000000	2324200000	10520000000	4172400000	5649000000	5683300000	8817500000	6892100000	3853800000	11527000000	9037400000	14628000000	9723400000	6197000000	8433400000	4662700000	5266300000	8089100000	6779400000	9901400000	3896400000	6968100000	6115000000	2963400000	6353200000	3499300000	4353200000	3455500000	4052400000	5759700000	3168800000	7353400000	7822400000	2418800000	8025800000
P06317	P06317		1087000000	5227000000	2794600000	1282300000	1707700000	781490000	5417700000	1102500000	2207900000	6569800000	2566700000	2553600000	5990800000	2481000000	6246700000	3008800000	3205100000	1834500000	4909200000	5340300000	1343900000	1086600000	5390300000	1710700000	2710300000	918990000	3092100000	1948100000	3950000000	3149000000	1860600000	5335600000	2497400000	9936500000	2894300000	12540000000	3149000000	3460600000	3562500000	10598000000	9231400000	5369900000	4792300000	1768400000	3840900000	2608000000	3167800000
P06318	P06318		96315000	238370000	57738000	47649000	42316000	30931000	54409000	90328000	133980000	128810000	125650000	93399000	81180000	64970000	141150000	58781000	74604000	154440000	218470000	172760000	34832000	79881000	101870000	110480000	37380000	53863000	53176000	36621000	94052000	113980000	38860000	241780000	54673000	184620000	137660000	176060000	139090000	108970000	93314000	0	81887000	13235000	215220000	175760000	134690000	63500000	124690000
P06331	P06331		2255300000	2809800000	3233400000	1916400000	1664200000	1030000000	2317500000	1692100000	2630000000	1982900000	1993000000	1998900000	1924200000	1407800000	3428800000	2003600000	1920400000	2526200000	2289500000	2639500000	1679400000	3796700000	2615700000	5111200000	3087100000	3720300000	2931600000	2958600000	2020800000	1634100000	2571700000	3620600000	4807400000	7940100000	7479800000	5087300000	5254800000	2877800000	4007900000	4033500000	4361600000	2758700000	2543200000	1891700000	1970700000	1320200000	1887900000
P06396	P06396	GSN	28110000000	41255000000	30808000000	24604000000	27061000000	27170000000	30682000000	34322000000	27863000000	31522000000	35475000000	24391000000	34219000000	31519000000	33405000000	34852000000	21975000000	35843000000	28546000000	29115000000	26273000000	22566000000	34583000000	21332000000	27499000000	23780000000	26048000000	36951000000	25206000000	28696000000	22961000000	33125000000	22903000000	19281000000	15264000000	15136000000	19700000000	22387000000	16049000000	21930000000	19815000000	32439000000	20542000000	31320000000	31530000000	15057000000	31031000000
P06454	P06454	PTMA	0	0	0	0	0	0	0	0	0	0	0	0	0	0	0	0	0	0	0	0	0	0	0	0	0	0	0	0	0	0	0	0	0	0	0	0	0	0	0	0	0	0	0	0	0	0	0
P06681	P06681	C2	20412000000	15319000000	20792000000	18146000000	19451000000	22015000000	16184000000	23412000000	18820000000	22208000000	21521000000	14214000000	21747000000	21232000000	19549000000	20300000000	20030000000	19246000000	21453000000	22633000000	21095000000	16072000000	20877000000	17816000000	21588000000	19216000000	17098000000	21648000000	19686000000	19296000000	20029000000	20184000000	27426000000	17654000000	34198000000	13478000000	30005000000	28354000000	35393000000	25705000000	29431000000	42017000000	25019000000	18930000000	14124000000	24962000000	17765000000
P06702	P06702	S100A9	517110000	1075900000	614600000	98572000	1225200000	158770000	155220000	237140000	406440000	582490000	132970000	381740000	129440000	171510000	588340000	294810000	1069700000	150090000	3213500000	68075000	260010000	207870000	880630000	650570000	551880000	58733000	753220000	97253000	259290000	350570000	333460000	5838300000	2476500000	14335000000	5011700000	2890500000	6324400000	3728800000	2404800000	22557000000	4800600000	4385500000	3766700000	6072100000	4881400000	2605400000	6630400000
P06703	P06703	S100A6	0	0	0	0	0	0	45195000	0	0	0	0	0	0	0	126770000	0	0	0	0	0	0	0	0	0	0	0	0	86878000	0	0	0	0	0	153010000	0	0	0	383060000	0	421980000	0	0	0	76699000	0	0	0
P06727	P06727	APOA4	229000000000	198000000000	202000000000	165000000000	183000000000	223000000000	268000000000	320000000000	176000000000	231000000000	249000000000	204000000000	254000000000	288000000000	242000000000	261000000000	106000000000	251000000000	164000000000	245000000000	204000000000	151000000000	186000000000	216000000000	312000000000	152000000000	217000000000	208000000000	244000000000	171000000000	185000000000	467000000000	90385000000	148000000000	127000000000	396000000000	84818000000	201000000000	35527000000	127000000000	220000000000	105000000000	197000000000	102000000000	123000000000	122000000000	224000000000
P06732	P06732	CKM	34586000	8392300	7085100	5824600	0	0	4027100	0	9199400	0	11513000	0	0	28311000	0	13977000	12117000	7759600	9216700	6516800	386740000	0	5772300	11227000	0	4355400	0	0	8416500	0	0	6187100	151540000	10096000	17115000	12553000	3257800000	0	37647000	0	267150000	48842000	8406100	14439000	20136000	16812000	0
P06733	P06733	ENO1	0	0	12875000	0	19046000	0	0	0	0	16577000	0	0	0	0	0	0	9770200	16553000	12896000	0	207940000	0	14735000	24093000	41947000	0	0	18503000	50413000	14008000	0	83371000	0	0	0	0	26819000	86477000	0	419530000	0	31524000	0	106770000	104430000	80787000	55762000
P06737	P06737	PYGL	0	0	0	0	0	0	0	0	4805400	0	0	0	0	0	0	0	5295600	0	23203000	8637800	14644000	7593000	0	0	0	0	0	8357000	0	14914000	0	0	0	0	8370200	0	7127500	6555300	6166100	0	7924900	0	0	0	0	7000200	3727300
P06744	P06744	GPI	0	83008000	0	0	0	0	0	172010000	13799000	0	0	12366000	0	0	0	0	0	0	0	29927000	0	0	8285300	0	0	0	0	0	0	0	0	0	0	0	0	0	0	0	0	300830000	0	0	0	23316000	17799000	0	632670000
P06753	P06753	TPM3	0	0	0	0	0	0	0	0	44754000	0	0	0	0	0	0	0	0	0	0	0	0	0	0	0	0	0	0	0	0	0	0	0	0	0	0	0	52512000	0	0	0	0	0	0	0	0	0	0
P06889	P06889		109100000	111390000	129610000	103160000	102070000	0	110440000	105880000	149200000	132360000	116770000	98385000	104540000	0	118850000	90535000	61728000	232700000	204310000	135320000	53698000	0	84033000	234340000	87981000	78962000	72744000	114130000	144630000	64399000	77871000	244480000	181840000	136530000	311550000	222040000	229200000	180800000	106910000	354610000	132560000	138630000	127010000	179310000	157980000	0	252200000
P07108	P07108	DBI	0	0	0	0	0	0	0	0	0	0	0	0	0	0	0	0	0	0	0	0	0	0	0	0	0	0	0	0	0	0	0	100810000	74362000	0	0	0	20988000	0	0	204300000	0	0	0	122140000	0	0	120250000
P07148	P07148	FABP1	0	0	0	0	0	0	0	0	5692600	0	0	0	0	0	0	0	0	0	0	0	0	0	0	0	0	0	0	0	4361000	0	0	321140000	0	0	0	18479000	0	0	0	0	0	0	0	844910000	14300000	0	61257000
P07195	P07195	LDHB	91345000	141180000	21776000	0	115940000	44812000	68668000	69047000	0	58594000	91500000	0	0	152680000	0	133910000	0	41019000	51532000	0	131610000	0	73896000	0	78494000	0	40901000	74614000	93010000	0	44980000	34329000	0	314710000	0	465000000	333660000	280750000	138630000	163340000	756870000	191320000	70542000	27783000	76724000	550900000	0
P07225	P07225	PROS1	21050000000	23623000000	19074000000	19574000000	22347000000	26023000000	19510000000	19622000000	21816000000	18395000000	27451000000	17569000000	23112000000	19275000000	19687000000	18535000000	22077000000	20571000000	25937000000	17370000000	24672000000	16101000000	20991000000	20270000000	17594000000	18400000000	19055000000	17633000000	22598000000	24330000000	20470000000	15699000000	14535000000	20709000000	13143000000	14803000000	22178000000	13969000000	20288000000	18739000000	20391000000	20717000000	19629000000	16721000000	16691000000	27477000000	22587000000
P07237	P07237	P4HB	24857000	0	28896000	28746000	5650200	27883000	15948000	0	12880000	5035600	50659000	34179000	39958000	10266000	0	25936000	12689000	26578000	21140000	91335000	0	39482000	0	0	28845000	7232500	0	173370000	26078000	39029000	3803100	967320000	12028000	14699000	0	130390000	0	34125000	39225000	30897000	72128000	33950000	53885000	23442000	34653000	90880000	120630000
P07307	P07307	ASGR2	116770000	26261000	15764000	23867000	89104000	0	333050000	181210000	32412000	0	42498000	0	33583000	54342000	0	0	50844000	42704000	15365000	0	58430000	0	45488000	79772000	0	0	0	56629000	0	44171000	27276000	120700000	152330000	331910000	241050000	196980000	177070000	238660000	65601000	0	216910000	197860000	99233000	46256000	0	68335000	40402000
P07327	P07327	ADH1A	0	0	0	0	0	0	0	0	0	0	0	0	0	0	0	0	0	0	0	0	0	0	0	0	0	0	0	0	0	0	0	0	0	0	0	0	0	0	0	0	0	0	0	0	0	53010000	0
P07333	P07333	CSF1R	73549000	152920000	117670000	127590000	150440000	154730000	118260000	51029000	104600000	90719000	92957000	101840000	107960000	85918000	87724000	173330000	116090000	111060000	66594000	137110000	141710000	104680000	110400000	189120000	145530000	173600000	195600000	363760000	61168000	110430000	61724000	138670000	100790000	181530000	163730000	1432100000	0	72897000	218640000	0	146160000	223520000	158340000	158370000	0	92720000	124410000
P07339	P07339	CTSD	177290000	80417000	176120000	96684000	134900000	199960000	132230000	85835000	123340000	0	97343000	82453000	90577000	159400000	143630000	110390000	141280000	59461000	113540000	106100000	94223000	0	130960000	137680000	122260000	296220000	110400000	232800000	196970000	89292000	125390000	93156000	109770000	0	186520000	435900000	177030000	295970000	138440000	84224000	210330000	143450000	111610000	325300000	240320000	100270000	345910000
P07357	P07357	C8A	12602000000	13679000000	10490000000	10703000000	12971000000	10080000000	12654000000	9870600000	7099600000	10196000000	11388000000	6665800000	9512400000	12358000000	12281000000	11758000000	9518700000	9392500000	6494200000	9381600000	10457000000	12660000000	11176000000	8477300000	8555500000	8249900000	8255000000	9274800000	10701000000	8333100000	11909000000	10993000000	15629000000	13272000000	13653000000	4342300000	18108000000	12641000000	17018000000	12625000000	15483000000	17465000000	13298000000	10847000000	9637500000	11406000000	10996000000
P07358	P07358	C8B	2142500000	3469800000	2613100000	2497700000	1584200000	1687900000	2159600000	2395100000	1676900000	3338100000	2547100000	834510000	2677000000	2612800000	3232900000	2707700000	3096800000	2385900000	1498600000	2073800000	1728300000	2570900000	2455000000	1234300000	3266200000	1616000000	1416600000	1920600000	2256400000	2139100000	2065700000	1356200000	3721100000	1974200000	2797600000	168380000	4359300000	2642700000	3568800000	2929800000	3160100000	4701000000	3598500000	3894300000	2938300000	2711500000	3384100000
P07359	P07359	GP1BA	643620000	434800000	530740000	703000000	772960000	608260000	639350000	511680000	669430000	463000000	572830000	538940000	649890000	495860000	574600000	706370000	361050000	312220000	922810000	592940000	636200000	333830000	509020000	696600000	785650000	547790000	558660000	730560000	642370000	727920000	650150000	441540000	189620000	1020700000	428440000	857300000	689090000	397020000	420190000	812000000	792250000	433040000	385870000	1030000000	470970000	417890000	701160000
P07360	P07360	C8G	12003000000	8971000000	8110400000	8675000000	9548100000	8959300000	9727400000	6450000000	3914300000	7094700000	9903700000	5970400000	8745700000	12402000000	10940000000	8051500000	8023300000	9768600000	4862400000	8151100000	7188300000	9696600000	10116000000	9104500000	8799700000	11557000000	9704100000	9020700000	10349000000	4547600000	10480000000	11803000000	12832000000	11099000000	12379000000	4524600000	12296000000	11210000000	14084000000	12354000000	13351000000	17837000000	15108000000	9162200000	8469400000	9978400000	10162000000
P07384	P07384	CAPN1	0	0	0	0	0	0	0	0	0	0	0	0	0	0	0	0	0	0	0	0	0	0	0	0	0	0	0	0	0	41476000	0	0	0	0	0	0	0	0	0	0	0	0	0	0	0	0	0
P07451	P07451	CA3	0	0	0	0	0	0	0	0	0	1241000	0	0	0	0	0	0	9367200	0	0	0	9977600	0	0	0	16393000	0	0	1214200	0	0	0	18528000	0	27215000	0	0	2326000000	0	0	0	217800000	56957000	0	519600000	242270000	26823000	115050000
P07478	P07478	PRSS2	256790000	823810000	503090000	267990000	295830000	310960000	214850000	727430000	373170000	359030000	611970000	378490000	444540000	316360000	369120000	331690000	230250000	409540000	500400000	738230000	532920000	474400000	363220000	610220000	441390000	286870000	566230000	694960000	222040000	285930000	264620000	1646200000	745160000	2228700000	802840000	625550000	925570000	1300400000	1684700000	1038500000	1362700000	978050000	1488100000	652290000	579920000	602210000	942060000
P07602	P07602	PSAP	0	0	68703000	78134000	0	75489000	130370000	156250000	88734000	0	65147000	94179000	0	0	86831000	0	0	51915000	51593000	0	64918000	63061000	75670000	125040000	60755000	0	79837000	92643000	0	95614000	0	131510000	305820000	0	0	177750000	0	84875000	0	292320000	177150000	174250000	0	305820000	82382000	0	145380000
P07711	P07711	CTSL	0	0	0	0	0	0	0	0	0	0	0	0	0	0	0	0	0	0	0	0	0	0	0	0	0	0	0	0	0	0	0	0	0	0	0	0	0	0	0	0	0	0	0	25229000	0	0	0
P07737	P07737	PFN1	31979000	0	62162000	0	70713000	49123000	0	0	0	0	37702000	34571000	0	0	0	60799000	0	0	0	44091000	0	0	0	0	86650000	69706000	81252000	27481000	70418000	93432000	189130000	116380000	0	415680000	68064000	206530000	166730000	97613000	0	568050000	216180000	191040000	0	480040000	58303000	0	166290000
P07738	P07738	BPGM	0	0	0	0	0	0	0	0	255960000	71459000	0	43695000	0	0	47245000	0	0	0	48504000	0	0	35872000	0	0	0	47140000	0	0	51370000	0	0	0	0	0	0	0	0	70298000	0	0	0	0	0	0	0	0	0
P07858	P07858	CTSB	0	0	0	0	0	0	0	0	0	0	0	0	106380000	0	0	0	0	0	0	0	0	0	0	0	0	0	0	0	94397000	0	79794000	0	104760000	0	239800000	601370000	234040000	146870000	0	0	90251000	50021000	0	205190000	232650000	0	527080000
P07900	P07900	HSP90AA1	0	19053000	0	36505000	12675000	0	17526000	61664000	9921500	0	0	0	0	0	0	0	0	0	63880000	0	10476000	0	0	0	0	0	0	21625000	0	10422000	17605000	18609000	21424000	41419000	0	14859000	24421000	68135000	13666000	0	0	0	13422000	0	21338000	0	137270000
P07910	P07910	HNRNPC	0	0	0	0	0	0	0	0	0	0	0	0	0	0	0	0	0	0	0	0	0	0	0	0	0	0	0	0	0	0	0	0	0	0	0	0	0	0	0	0	0	0	0	0	0	0	0
P07942	P07942	LAMB1	0	0	0	0	0	0	0	0	0	0	0	0	73734000	0	0	0	0	48000000	0	0	0	0	0	0	69705000	0	0	0	0	0	0	0	0	0	0	54867000	0	0	0	0	0	70069000	0	0	0	0	0
P07954	P07954	FH	0	0	0	0	0	0	0	0	0	0	0	0	0	0	0	0	0	0	0	0	0	0	0	0	35507000	0	0	0	0	0	0	0	59956000	128080000	83432000	0	0	102730000	0	0	367270000	91994000	73212000	0	0	0	0
P07988	P07988	SFTPB	0	0	0	96727000	0	157750000	0	0	60831000	0	0	70530000	0	0	0	179070000	0	301090000	0	53582000	0	0	0	0	0	0	0	0	0	0	0	120920000	0	478940000	110820000	0	0	512510000	0	149790000	239500000	92950000	0	0	0	164640000	0
P08185	P08185	SERPINA6	19219000000	21798000000	24352000000	19965000000	25717000000	20918000000	22517000000	15529000000	18552000000	15691000000	21845000000	16100000000	18509000000	21376000000	22665000000	21350000000	27754000000	23847000000	17532000000	22525000000	27973000000	20960000000	25769000000	23737000000	17135000000	24157000000	22131000000	18147000000	31251000000	26324000000	25759000000	13351000000	17239000000	15938000000	22741000000	18411000000	12741000000	15518000000	24687000000	11751000000	20385000000	19912000000	18882000000	13398000000	17884000000	19843000000	18955000000
P08195	P08195	SLC3A2	28542000	0	0	21405000	0	29460000	0	23716000	0	0	52774000	0	0	0	0	0	27489000	0	0	42602000	54071000	0	21351000	0	0	0	0	0	0	38054000	0	62590000	0	0	0	93943000	0	0	0	0	47821000	60361000	0	0	24110000	0	45168000
P08217	P08217	CELA2A	0	0	0	0	0	0	0	0	0	0	0	0	0	0	0	0	0	0	0	0	0	0	0	0	0	0	0	0	0	0	0	0	0	0	0	0	0	0	0	0	96428000	0	0	0	0	0	0
P08238	P08238	HSP90AB1	0	0	39838000	0	0	0	31729000	0	10693000	0	29820000	16425000	22678000	0	0	0	0	0	0	0	0	0	0	0	24547000	0	0	0	11988000	0	0	0	0	0	0	0	19238000	0	0	0	0	0	0	17144000	0	0	0
P08246	P08246	ELANE	0	0	0	0	0	0	0	0	0	0	0	0	131390000	0	0	0	0	0	0	0	0	0	0	0	0	0	0	0	0	0	0	0	126130000	58754000	50532000	53105000	69144000	416310000	73598000	468160000	284040000	0	72638000	83173000	353810000	0	226830000
P08253	P08253	MMP2	0	0	0	0	0	0	0	0	0	0	0	0	0	0	0	33987000	0	0	0	0	0	0	0	60791000	0	0	0	29140000	0	21211000	0	33858000	0	0	0	72393000	0	0	0	0	0	30131000	0	0	0	0	0
P08254	P08254	MMP3	938120000	2312700000	1019500000	1051000000	1138900000	1308700000	923950000	861630000	998670000	1248000000	1058800000	1136000000	1029300000	1300800000	1147900000	1300100000	891420000	1254600000	1567300000	775780000	1170900000	1100300000	926770000	1339000000	970470000	1411700000	1117600000	1516200000	807190000	1042300000	887840000	1086900000	1186200000	1411100000	1470200000	2468000000	2129500000	1430500000	1442800000	1988200000	1311300000	1067800000	1718600000	1171600000	1449800000	1350400000	905040000
P08263	P08263	GSTA1	0	0	0	0	66272000	0	0	0	42316000	64631000	0	70409000	58290000	0	48122000	52908000	48735000	52053000	0	72114000	0	0	0	0	0	0	108070000	0	0	31376000	0	0	0	0	0	87358000	52336000	0	0	0	80433000	0	0	26127000	131040000	0	40543000
P08294	P08294	SOD3	105630000	207630000	63310000	0	0	65473000	122640000	1215000000	40338000	174730000	119180000	17996000	121870000	186430000	73043000	78125000	119550000	112190000	85802000	129380000	128270000	82146000	62028000	86534000	59018000	0	0	15481000	138330000	75204000	112390000	250700000	113760000	756470000	62762000	490910000	0	575710000	69248000	0	175730000	189670000	0	139590000	187500000	128160000	189240000
P08311	P08311	CTSG	0	0	0	0	47501000	162850000	0	0	69125000	0	96212000	0	0	0	0	0	0	0	49893000	0	0	54679000	0	58260000	48915000	0	0	0	0	54127000	0	0	0	0	0	0	0	0	0	0	31065000	0	0	0	29235000	0	34834000
P08319	P08319	ADH4	12682000	16188000	6080200	0	0	15675000	10458000	0	17809000	0	19577000	0	11976000	0	0	0	0	0	0	0	13559000	0	0	0	0	0	0	0	0	0	6264100	791840000	0	19791000	45394000	44765000	46982000	40640000	0	18426000	20321000	37487000	38057000	18803000	39498000	42541000	1770600000
P08519	P08519	LPA	3122400000	2066300000	2954600000	6726900000	2596600000	199180000	22874000000	4386900000	70960000	534720000	796300000	933510000	12705000000	246220000	498140000	1804200000	30591000000	2151900000	1086200000	1873100000	1362900000	801780000	2128800000	363390000	451030000	596900000	1279600000	479650000	87524000	11591000000	2803300000	23505000000	6645700000	8703600000	5779100000	9551400	5855900000	818320000	198750000	224120000	2998900000	1584200000	10512000000	5149100000	177910000	7943000000	617830000
P08571	P08571	CD14	1654000000	1621000000	1736500000	1919100000	1837000000	1325000000	2033500000	2548400000	1696700000	1794700000	2141700000	1564500000	1654000000	1522800000	1796400000	1664300000	1232800000	1236700000	1607000000	1557100000	2101000000	1381900000	1790000000	2052300000	1730200000	1869600000	1350900000	2241600000	1650300000	1659900000	1612700000	2002900000	3513600000	4977800000	3864900000	4830100000	2974800000	3196300000	2595400000	3502700000	3907400000	4717900000	4018100000	2775500000	1760600000	2429200000	2869500000
P08590	P08590	MYL3	0	0	0	0	0	0	0	0	0	0	0	0	0	0	0	0	0	0	0	0	0	0	0	0	0	0	0	0	0	0	0	0	0	0	0	0	269640000	0	0	0	108530000	0	0	0	0	0	0
P08603	P08603	CFH	48260000000	66473000000	50690000000	74620000000	55331000000	37472000000	43600000000	77229000000	62889000000	87638000000	62278000000	40904000000	54738000000	64486000000	69782000000	56781000000	60736000000	64766000000	66848000000	54281000000	51880000000	65973000000	65099000000	37810000000	60065000000	46562000000	55330000000	71497000000	60422000000	74073000000	43504000000	37209000000	90007000000	33444000000	58788000000	19048000000	64104000000	45455000000	79371000000	54868000000	61298000000	65256000000	76072000000	83245000000	68141000000	74001000000	99423000000
P08637	P08637	FCGR3A	319580000	392190000	568870000	497100000	557470000	428610000	439090000	517080000	500110000	411980000	323390000	320910000	332750000	563360000	434920000	545250000	539060000	591900000	327740000	454590000	388080000	639770000	376660000	369780000	267270000	483130000	426840000	524390000	454360000	424350000	413050000	239790000	338590000	628400000	451010000	1637500000	341610000	476590000	500010000	429890000	358960000	324030000	279260000	574970000	984080000	670580000	595770000
P08670	P08670	VIM	0	0	0	0	0	0	127120000	190530000	184590000	231520000	215580000	168680000	0	154740000	288710000	163430000	217540000	274640000	0	0	0	262050000	189890000	416610000	133990000	0	0	156650000	0	238060000	0	283640000	0	388560000	0	562150000	0	362660000	128250000	1885100000	242670000	267780000	236040000	214070000	451610000	197590000	0
P08697	P08697	SERPINF2	47284000000	40098000000	47455000000	38625000000	43487000000	49081000000	46751000000	35866000000	36321000000	38413000000	52080000000	34132000000	48617000000	42333000000	39510000000	42976000000	42040000000	45459000000	38042000000	43031000000	51980000000	46018000000	39943000000	42809000000	40314000000	53110000000	32387000000	32787000000	41092000000	43690000000	38000000000	23082000000	36048000000	38949000000	52153000000	39499000000	48856000000	49614000000	65266000000	30786000000	30332000000	44131000000	49901000000	29094000000	41221000000	47604000000	31063000000
P08709	P08709	F7	206410000	269710000	291470000	300410000	275750000	338740000	230270000	360470000	267410000	194130000	411470000	221670000	234790000	239730000	266930000	339750000	431380000	345870000	246460000	253600000	382170000	166500000	317670000	183830000	147300000	0	179180000	183810000	186520000	241950000	144230000	130110000	304510000	0	0	0	107420000	114070000	169450000	0	0	181630000	139820000	159570000	0	194250000	195840000
P08833	P08833	IGFBP1	0	0	0	0	0	0	0	0	66841000	226100000	0	0	0	0	0	0	0	0	0	85509000	0	0	0	0	0	0	0	0	0	0	0	62381000	0	131490000	0	594230000	144050000	77938000	0	0	606110000	192060000	199100000	255640000	0	0	0
P08861	P08861	CELA3B	0	0	0	0	0	0	0	0	0	0	0	0	0	0	0	0	0	0	0	0	0	0	0	0	0	0	0	0	0	0	0	0	0	0	0	0	0	0	0	0	0	0	0	0	0	0	0
P09104	P09104	ENO2	0	0	0	0	0	0	0	0	0	0	0	0	0	0	0	0	0	0	0	0	0	0	0	0	0	0	0	0	0	0	0	0	0	0	0	0	0	0	0	0	0	0	0	0	0	0	0
P09110	P09110	ACAA1	0	0	0	0	0	0	0	0	0	0	0	0	0	0	0	0	0	0	0	0	0	0	0	0	0	0	0	0	0	0	0	0	0	0	0	0	0	0	0	0	0	0	0	0	0	0	45446000
P09172	P09172	DBH	145380000	322370000	283490000	110770000	263320000	638840000	519350000	48456000	371260000	812220000	115410000	552840000	1154700000	276750000	394670000	724190000	129750000	60404000	366870000	1460600000	398100000	390670000	358110000	384130000	687800000	0	122070000	636490000	284460000	419540000	559640000	270930000	930220000	230010000	107240000	1138700000	68461000	0	0	316480000	139330000	613100000	0	109330000	283570000	305800000	245890000
P09211	P09211	GSTP1	0	0	0	0	0	0	0	0	0	0	0	0	0	0	0	0	0	0	0	0	0	0	0	0	0	0	0	0	0	0	0	0	0	55757000	0	36887000	0	0	0	107540000	0	49366000	0	0	0	0	0
P09382	P09382	LGALS1	0	0	0	0	0	0	0	0	0	0	0	0	0	0	0	0	19384000	44117000	0	0	0	0	30866000	38722000	0	0	0	0	0	0	54525000	0	0	79538000	0	0	116270000	65817000	0	61838000	0	0	0	107820000	39890000	0	19580000
P09467	P09467	FBP1	0	0	6241500	13925000	0	7828500	19603000	0	13474000	9384700	7840500	11376000	7822400	0	0	0	0	0	10577000	9365900	0	10384000	0	0	14595000	17659000	5487300	0	9802200	6355300	0	0	15693000	0	0	6416100	0	8309800	0	23126000	0	9900200	0	0	0	8602900	18619000
P09486	P09486	SPARC	1094600000	1912900000	953100000	1245500000	967180000	996870000	1391800000	756260000	1333700000	977970000	1010200000	1185400000	1665100000	835990000	1420600000	1002100000	1219700000	536260000	1122200000	995460000	1414100000	1032900000	1181900000	1329400000	2223000000	998690000	1446900000	1102000000	971810000	836510000	1396400000	0	278100000	1103100000	1105700000	900940000	1620500000	1291400000	865540000	1834000000	0	829470000	1027600000	1546600000	321770000	1284300000	1070700000
P09488	P09488	GSTM1	0	0	0	0	0	0	0	0	0	12979000	0	0	0	0	0	0	0	0	0	0	0	0	0	0	0	0	9319600	0	0	0	0	0	0	19994000	0	0	0	0	0	0	0	0	0	0	0	0	0
P09493	P09493	TPM1	0	0	0	0	69390000	0	0	0	0	0	0	0	0	0	0	0	0	0	0	0	0	0	0	0	0	0	0	0	0	0	66167000	0	0	0	53269000	38139000	75254000	0	60136000	0	37338000	55335000	0	0	0	0	0
P09622	P09622	DLD	0	0	0	0	0	0	0	0	0	0	26454000	0	0	19099000	0	0	0	0	0	0	0	0	0	0	0	0	0	0	0	0	0	0	0	0	0	0	0	0	0	0	0	0	0	0	0	0	0
P09871	P09871	C1S	12714000000	13074000000	11276000000	14109000000	13809000000	11540000000	12350000000	9912000000	11341000000	11932000000	12267000000	10455000000	14408000000	12109000000	9725600000	11839000000	11148000000	9072300000	10435000000	9757700000	11928000000	9191000000	12170000000	12617000000	10898000000	9383800000	10284000000	11082000000	11468000000	9299300000	10050000000	8006900000	17447000000	12567000000	16555000000	13228000000	15028000000	14297000000	17242000000	11578000000	16789000000	18718000000	10032000000	7586600000	7580200000	13696000000	8002000000
P09960	P09960	LTA4H	26032000	0	27501000	0	0	38378000	0	0	0	0	0	0	0	0	0	0	0	0	48692000	0	0	19987000	0	20388000	0	28401000	0	0	0	0	0	35084000	0	0	0	0	34852000	46887000	0	74695000	58156000	20173000	0	0	21023000	0	32968000
P09972	P09972	ALDOC	0	0	0	0	0	0	0	0	0	0	0	0	0	0	0	0	0	0	0	0	0	0	0	0	0	0	0	0	0	0	0	0	0	0	0	0	0	0	0	0	124440000	0	0	0	0	0	0
P0C0L4	P0C0L4	C4A	9394900000	12636000000	6831000000	8227700000	8896400000	6240400000	4131900000	10814000000	9945800000	5836400000	8006900000	5962100000	6376400000	11773000000	6598900000	8902200000	9984900000	8082700000	4834500000	9694400000	6683900000	10385000000	3671300000	4533400000	6211300000	6657800000	8352300000	6176700000	6547700000	7203500000	7009900000	7304200000	7509600000	11515000000	15127000000	12843000000	11562000000	7682100000	12008000000	6645300000	14163000000	7005700000	9968400000	6691100000	5690000000	9558300000	5849100000
P0C0L5	P0C0L5	C4B	331000000000	508000000000	240000000000	364000000000	366000000000	253000000000	223000000000	344000000000	422000000000	283000000000	440000000000	282000000000	355000000000	443000000000	320000000000	411000000000	364000000000	415000000000	432000000000	364000000000	273000000000	428000000000	219000000000	295000000000	381000000000	335000000000	441000000000	372000000000	302000000000	399000000000	303000000000	328000000000	433000000000	482000000000	575000000000	441000000000	470000000000	424000000000	512000000000	390000000000	571000000000	441000000000	453000000000	386000000000	272000000000	481000000000	317000000000
P0CG05	P0CG05	IGLC2	170000000000	250000000000	151000000000	120000000000	126000000000	115000000000	211000000000	141000000000	184000000000	202000000000	144000000000	222000000000	171000000000	112000000000	185000000000	163000000000	200000000000	139000000000	179000000000	210000000000	96881000000	133000000000	152000000000	212000000000	154000000000	127000000000	203000000000	203000000000	136000000000	133000000000	153000000000	219000000000	166000000000	284000000000	244000000000	223000000000	214000000000	193000000000	163000000000	229000000000	275000000000	171000000000	199000000000	151000000000	207000000000	329000000000	180000000000
P0CG06	P0CG06	IGLC3	206030000	169930000	226820000	0	182940000	163900000	143090000	150370000	0	0	180930000	240170000	0	49802000	0	170520000	61710000	0	63452000	0	166750000	318720000	0	204950000	228850000	289030000	258600000	68006000	118540000	0	196110000	326240000	250660000	207240000	561430000	169750000	390720000	340460000	174010000	183300000	368010000	1026200000	360120000	253130000	729670000	135720000	246250000
P62987	P62987	UBA52	0	0	0	0	36879000	0	0	0	0	42873000	0	0	0	0	0	30411000	0	0	0	0	0	0	0	0	0	0	0	0	0	0	0	0	0	47221000	0	44440000	0	58596000	0	0	0	0	0	36407000	0	0	0
P0DJI8	P0DJI8	SAA1	2402300000	1703700000	1489600000	1601900000	2828700000	1267800000	2085000000	3425400000	765510000	7757100000	860120000	4545700000	1770500000	1341700000	1766300000	2066100000	2573500000	1239200000	755460000	306360000	2667500000	10799000000	1547600000	6190900000	1381000000	1381500000	1933800000	1206200000	329210000	3208300000	1847100000	68779000000	189000000000	22473000000	196000000000	71279000000	229000000000	160000000000	68771000000	114000000000	147000000000	181000000000	257000000000	71124000000	148000000000	21162000000	60324000000
P0DJI9	P0DJI9	SAA2	0	0	0	0	0	0	0	0	0	0	0	0	0	0	66362000	0	0	0	0	0	0	0	0	0	0	0	54757000	0	0	0	0	4104200000	12456000000	1151400000	7072500000	2166400000	15053000000	11062000000	3202600000	4178900000	4464000000	18145000000	16487000000	2879400000	8753900000	727070000	1403800000
P0DMV9	P0DMV9	HSPA1B	0	0	0	0	0	0	0	0	0	0	0	0	51970000	0	0	0	0	0	0	0	0	0	0	0	0	0	0	0	0	0	0	0	0	0	0	0	0	0	79429000	44005000	0	0	0	0	40320000	0	0
P0DN79	P0DN79	CBS	0	0	0	0	0	0	0	0	0	0	48353000	0	0	0	0	0	50289000	0	0	0	32150000	0	0	0	0	0	0	0	0	0	0	0	0	0	0	0	0	0	0	0	0	0	0	0	28221000	0	0
P10124	P10124	SRGN	109640000	116850000	105910000	109000000	103920000	0	98547000	94610000	22945000	25888000	87778000	71962000	0	61272000	154200000	0	129730000	0	106870000	0	150970000	105800000	80063000	96179000	23607000	38957000	0	0	0	61280000	81925000	0	0	59100000	0	0	277670000	0	180020000	124110000	0	0	0	125680000	0	95672000	41939000
P10153	P10153	RNASE2	0	0	0	0	0	0	0	0	0	0	0	0	0	0	0	0	0	0	34420000	72914000	0	0	0	55029000	0	0	0	0	0	0	0	0	0	110050000	0	36744000	0	0	0	0	0	0	0	0	0	0	46738000
P10319	P10319	HLA-B	0	0	0	0	0	0	0	0	0	0	0	0	0	0	0	25264000	0	0	0	0	0	0	0	0	0	0	0	0	0	0	0	57368000	0	0	0	0	0	88118000	0	0	0	0	0	0	0	0	0
P10321	P10321	HLA-C1	0	0	64637000	59546000	0	0	0	0	44637000	144460000	0	0	0	63614000	65093000	167270000	153510000	0	162900000	0	167800000	72660000	0	37275000	0	273420000	0	0	66012000	0	0	104560000	0	56278000	0	132160000	192020000	498840000	0	0	56510000	136110000	0	101220000	0	0	0
P10451	P10451	SPP1	0	0	0	0	0	0	0	103000000	0	0	0	0	0	0	0	0	0	0	0	0	0	0	0	0	0	0	0	0	0	0	0	0	80423000	313410000	130880000	77123000	131150000	44737000	0	0	0	0	0	0	138310000	40779000	0
P10599	P10599	TXN	0	0	0	0	0	0	0	0	0	0	0	0	0	0	0	0	0	0	0	0	0	0	0	0	99040000	54097000	41880000	56769000	0	18156000	81478000	22908000	0	0	0	171500000	83814000	166770000	0	207360000	60122000	0	61709000	117910000	0	0	64625000
P10643	P10643	C7	19385000000	19740000000	20123000000	17452000000	14310000000	19569000000	14457000000	19543000000	15966000000	19453000000	17297000000	15722000000	16718000000	15545000000	20780000000	17898000000	14262000000	18376000000	19814000000	21828000000	21015000000	22317000000	12811000000	11419000000	14286000000	18495000000	13758000000	19931000000	16161000000	23202000000	11757000000	32772000000	20588000000	29907000000	26363000000	89975000000	17379000000	31515000000	26281000000	20503000000	44465000000	29855000000	28069000000	21315000000	14723000000	32233000000	20602000000
P10645	P10645	CHGA	0	0	227160000	0	0	0	0	0	0	0	0	0	0	0	335730000	261570000	0	0	263760000	227510000	0	348660000	0	0	0	0	0	0	222330000	229910000	0	198930000	0	370480000	236190000	0	0	0	0	101700000	0	0	0	245880000	0	0	0
P10646	P10646	TFPI	43214000	0	0	50072000	36240000	0	0	0	0	40433000	0	0	0	0	0	0	41567000	0	80711000	0	0	0	45823000	0	0	0	0	0	0	0	0	0	50810000	0	0	0	0	71507000	0	0	0	0	0	0	0	0	0
P10768	P10768	ESD	0	0	0	0	0	0	0	0	0	0	0	0	0	0	0	0	0	0	0	0	0	0	0	0	0	0	0	0	0	0	0	0	0	0	0	0	0	0	0	0	0	0	0	44054000	0	0	0
P10809	P10809	HSPD1	50860000	35522000	28314000	36584000	43225000	38438000	38153000	0	0	0	0	0	0	33064000	37036000	0	0	0	0	0	38000000	41205000	39968000	52942000	51002000	55722000	40238000	83617000	36101000	39669000	43671000	0	0	0	0	0	0	0	0	0	0	0	0	0	32727000	0	0
P10909	P10909	CLU	81284000000	77446000000	74600000000	61805000000	70834000000	75910000000	75411000000	79965000000	74531000000	80924000000	72651000000	63434000000	69469000000	72310000000	60605000000	79317000000	70592000000	64510000000	81135000000	80078000000	71266000000	60295000000	53840000000	64883000000	77208000000	80923000000	55946000000	75997000000	67212000000	78203000000	77205000000	86274000000	33564000000	48377000000	49168000000	35861000000	51835000000	61029000000	40690000000	57486000000	46636000000	51128000000	49766000000	56180000000	32563000000	83662000000	41014000000
P11021	P11021	HSPA5	378220000	121560000	245200000	278580000	256010000	277330000	252270000	121280000	129810000	122500000	241050000	109940000	155830000	256830000	92480000	196660000	111120000	147700000	89617000	178250000	707590000	97481000	212640000	217220000	54941000	26073000	43282000	84431000	51059000	259850000	183550000	999800000	186690000	2180400000	163190000	166910000	115780000	297550000	14707000	168970000	719850000	230980000	114630000	260660000	0	147470000	538120000
P11142	P11142	HSPA8	37499000	28940000	15697000	0	38567000	0	0	0	0	93970000	37189000	25606000	34292000	48489000	36978000	112630000	32057000	27564000	0	26674000	76161000	33352000	0	0	36360000	0	36428000	44728000	14235000	0	0	21393000	0	52221000	0	72050000	0	44448000	28917000	36014000	91106000	0	0	35062000	39526000	0	0
P11226	P11226	MBL2	346870000	73397000	305290000	1129600000	448580000	1075100000	577350000	415780000	440510000	1527900000	130120000	942210000	292540000	641730000	845770000	593600000	188340000	0	360140000	868800000	869440000	736970000	603920000	293830000	118900000	1689000000	1197900000	1119100000	553060000	809600000	765790000	431240000	162370000	1504900000	634200000	590810000	846970000	408340000	1083100000	718290000	343030000	458370000	252030000	548810000	491220000	656180000	1160600000
P11586	P11586	MTHFD1	0	146790000	0	0	147400000	0	0	0	0	0	0	0	143190000	0	0	0	0	0	0	0	0	0	0	0	76192000	0	0	0	0	0	0	0	0	0	0	0	55092000	145420000	122170000	0	82711000	0	0	0	0	0	121430000
P11597	P11597	CETP	922300000	1196600000	1104900000	1280900000	1138600000	1229400000	1065800000	708300000	809540000	2680100000	944790000	817180000	1131300000	937240000	1018500000	997310000	1360000000	1348300000	772900000	813770000	1178900000	1099600000	988420000	851040000	917870000	563910000	533230000	1561700000	411760000	788880000	595900000	87645000	572980000	204610000	592250000	749460000	554010000	542840000	843420000	557850000	182840000	23768000	781890000	1021100000	710660000	554880000	1301700000
P11684	P11684	SCGB1A1	0	52018000	0	0	0	0	0	230520000	0	0	0	0	0	44458000	0	0	0	50429000	0	0	0	19445000	0	0	0	0	0	0	0	21951000	0	176670000	32815000	293830000	90008000	129190000	84222000	50378000	0	0	0	0	56768000	78235000	110650000	0	17774000
P11717	P11717	IGF2R	0	0	53611000	0	0	52756000	0	0	59076000	84230000	0	68618000	0	0	0	0	86391000	0	77942000	71534000	0	60111000	0	72250000	0	0	0	0	0	55464000	65284000	0	0	0	0	185450000	100220000	95229000	80365000	92396000	0	0	0	73916000	0	0	0
P11766	P11766	ADH5	0	0	0	0	0	0	0	0	0	0	0	0	0	0	0	0	0	0	0	0	0	0	0	0	0	0	0	0	0	0	0	0	0	0	0	0	0	57348000	0	0	0	0	0	0	0	0	0
P12109	P12109	COL6A1	0	138490000	0	36443000	20004000	26051000	75194000	21123000	19617000	0	0	0	55794000	111730000	49284000	44203000	0	27636000	124180000	56939000	102160000	0	0	0	0	141850000	0	96782000	157730000	0	34861000	0	8864500	115070000	23232000	87037000	0	0	128190000	0	52918000	71900000	49330000	0	34892000	55664000	43483000
P12110	P12110	COL6A2	0	0	0	0	0	0	0	0	0	0	0	0	0	0	0	0	0	0	0	0	0	0	0	0	0	0	0	0	0	0	0	0	0	0	0	0	0	0	0	0	0	0	0	0	0	0	0
P12111	P12111	COL6A3	29727000	70974000	40832000	71495000	0	0	93638000	109170000	58903000	95232000	0	38867000	0	38357000	68925000	78306000	0	0	0	0	85801000	0	93866000	0	64940000	88981000	0	64087000	0	0	23977000	144750000	0	118120000	110050000	218920000	70956000	39228000	66573000	0	70978000	91534000	0	122060000	52900000	0	46024000
P12259	P12259	F5	2395500000	2287500000	2458300000	3386200000	4657000000	2868400000	2258900000	2676200000	2216000000	2121600000	2954800000	2095200000	2695200000	3009500000	2716900000	3078500000	2376700000	2534900000	2927300000	3143500000	2736200000	2604300000	2511100000	2807100000	2810500000	2738700000	2193700000	3106400000	2216900000	2252600000	2683500000	1494000000	2454600000	3625700000	3083000000	2122500000	2261000000	2433600000	2976900000	2522300000	1997700000	2430500000	2744800000	1712600000	1933500000	2811800000	1956200000
P12277	P12277	CKB	0	0	0	0	0	0	0	0	0	0	0	0	0	0	0	0	0	0	0	0	80998000	0	0	0	0	0	0	0	0	0	0	0	0	0	0	0	0	0	0	0	0	0	0	0	0	0	0
P12814	P12814	ACTN1	0	0	0	0	0	0	0	0	0	0	0	0	0	0	0	0	0	0	0	0	0	0	0	0	0	0	0	0	0	0	0	0	0	0	0	0	0	0	0	0	0	0	0	0	0	0	0
P12821	P12821	ACE	0	23609000	0	21223000	0	0	23355000	0	0	0	0	0	0	0	0	0	0	0	0	48255000	0	0	0	0	0	0	0	0	0	0	0	0	0	0	0	0	0	0	0	0	0	0	0	0	0	0	0
P12830	P12830	CDH1	76417000	93816000	63271000	54048000	73597000	90958000	66326000	145030000	0	93809000	64076000	84506000	64142000	58235000	58478000	55784000	0	86819000	82082000	93188000	0	55309000	53553000	53614000	0	0	0	52197000	108080000	58926000	0	233360000	0	0	108790000	290940000	55428000	43845000	0	0	134490000	83641000	0	58545000	0	0	146080000
P12883	P12883	MYH7	0	0	0	0	0	0	0	0	0	85216000	0	0	0	0	0	0	0	0	0	0	0	0	0	0	0	0	0	0	0	0	0	90338000	0	0	133680000	0	359160000	0	0	0	211540000	0	0	0	0	0	0
P12955	P12955	PEPD	157820000	118240000	137450000	160570000	162250000	130530000	218710000	144850000	177930000	188580000	133480000	153340000	75532000	203170000	175490000	147480000	96056000	147340000	139540000	223280000	490980000	113370000	118160000	161810000	83655000	216030000	191340000	191360000	122420000	191530000	143080000	248320000	104650000	183950000	0	432300000	121350000	190090000	90889000	416000000	234210000	186870000	171550000	214510000	225260000	154210000	163690000
P13473	P13473	LAMP2	79096000	133690000	98217000	68319000	98954000	101210000	2513000000	0	75993000	0	114710000	0	105550000	127240000	71462000	0	122370000	79429000	172630000	123550000	90003000	110080000	82299000	99530000	113510000	63625000	80095000	103890000	123620000	49397000	95459000	136670000	78157000	94984000	108580000	155480000	90489000	111410000	0	103680000	0	91341000	84283000	0	0	69824000	0
P13489	P13489	RNH1	585760000	951700000	183380000	728220000	643340000	321690000	251370000	559650000	844160000	325120000	480210000	156690000	196920000	348460000	84427000	0	724050000	368080000	363380000	258000000	0	0	0	0	0	3767100000	0	1650300000	0	251210000	40032000	0	0	154390000	0	290930000	367430000	395720000	105540000	316500000	127600000	0	376200000	700540000	0	413400000	0
P13591	P13591	NCAM1	189780000	113910000	110120000	100650000	70772000	119060000	138830000	169290000	64978000	82927000	152080000	70264000	168530000	129380000	154850000	150150000	93219000	114480000	127220000	318220000	326980000	101710000	134520000	109710000	74085000	110600000	102720000	153340000	100940000	365800000	97167000	0	0	120940000	0	183970000	0	0	85555000	104170000	161680000	53395000	0	63950000	226330000	175880000	0
P13598	P13598	ICAM2	132080000	144220000	153810000	92589000	200480000	140810000	115950000	63370000	113040000	104380000	128000000	145190000	139420000	124560000	119020000	134560000	129150000	155780000	224540000	163290000	188930000	155860000	121060000	145300000	136840000	193850000	157060000	250270000	115780000	157270000	162870000	217510000	72047000	210910000	191030000	644760000	134920000	154680000	308660000	187220000	175450000	114390000	182680000	123460000	142350000	158160000	160960000
P13611	P13611	VCAN	26732000	17833000	26869000	0	13544000	0	20526000	0	0	0	16875000	0	0	0	0	13075000	0	14621000	0	0	0	0	0	0	0	0	24967000	11946000	0	9727100	22318000	22709000	0	0	46078000	103510000	0	0	0	0	14742000	0	0	0	0	0	0
P13667	P13667	PDIA4	0	0	0	0	0	0	80531000	0	72301000	85311000	53314000	0	0	47935000	0	0	0	0	0	0	0	81397000	0	0	0	90888000	101960000	0	53960000	64419000	76874000	111220000	0	123860000	59682000	0	50148000	83348000	53548000	0	87022000	69571000	0	58256000	0	0	0
P13671	P13671	C6	7337800000	9584300000	7694200000	7492600000	8191000000	7922000000	8109900000	10554000000	7754100000	12872000000	8752700000	4438500000	8068500000	7885000000	9530400000	9889500000	7957300000	8769700000	8032100000	8166700000	8380900000	12732000000	9514800000	6920000000	10133000000	7436600000	7375900000	8898200000	6925600000	11546000000	7871300000	8263600000	12507000000	6569400000	8874300000	2877200000	10530000000	7886000000	8051600000	9849100000	10986000000	18113000000	8470600000	12214000000	10833000000	12993000000	8097500000
P13693	P13693	TPT1	0	0	0	0	0	0	0	0	0	0	0	0	0	40531000	0	0	0	0	0	0	0	0	0	40447000	48262000	0	0	0	0	0	0	0	0	0	0	0	0	0	0	0	0	0	0	0	0	0	0
P13716	P13716	ALAD	0	0	0	0	0	0	0	35473000	0	49529000	0	0	0	0	0	0	0	0	0	38119000	0	31199000	64229000	0	55866000	0	0	0	0	0	63204000	0	0	79385000	72435000	0	0	109560000	0	54154000	0	0	0	0	0	0	36976000
P13727	P13727	PRG2	0	0	0	30086000	0	0	0	0	0	0	0	0	0	0	44207000	0	380650000	0	62221000	0	47801000	0	0	0	0	0	0	0	0	0	12087000	127790000	0	69369000	70638000	84965000	36345000	112840000	45329000	121470000	98027000	0	0	0	0	63611000	0
P13796	P13796	LCP1	827750000	810470000	1020600000	873990000	1078500000	1002400000	787440000	736130000	853400000	767350000	859720000	754740000	679190000	895910000	874270000	1057600000	739560000	1051700000	1025800000	1144600000	1024400000	1369300000	932410000	874280000	1064400000	928450000	857960000	1430700000	971000000	925330000	987100000	1330600000	1174900000	2327500000	1537400000	2621500000	1380200000	2095700000	2267200000	2374500000	1543500000	1447200000	1238800000	991160000	1114100000	1420100000	814040000
P13797	P13797	PLS3	0	0	0	52819000	64150000	91955000	57301000	39217000	101010000	110330000	60839000	75413000	100140000	0	44127000	0	71607000	0	81945000	219870000	0	149240000	0	0	120150000	85827000	37891000	58256000	71582000	95714000	41997000	56380000	0	0	0	0	0	0	0	149140000	48475000	107040000	97667000	96199000	36192000	0	0
P13804	P13804	ETFA	0	0	0	0	0	0	0	0	0	0	0	0	0	0	0	0	0	0	0	0	0	0	0	0	0	0	0	0	0	0	0	0	0	0	0	0	0	0	0	0	0	0	0	0	0	0	0
P13805	P13805	TNNT1	0	0	0	0	0	0	0	0	0	0	0	0	0	0	0	0	0	0	0	0	0	0	0	0	0	0	0	0	0	0	0	0	0	0	0	0	127670000	0	0	0	0	0	0	0	0	0	0
P13929	P13929	ENO3	0	0	0	0	0	0	0	0	0	0	0	0	0	0	0	0	0	0	0	0	10967000	0	37695000	0	0	0	0	0	0	0	0	0	0	0	0	0	32287000	0	0	0	0	0	0	0	0	0	0
P13987	P13987	CD59	70715000	59221000	0	0	0	0	0	116420000	0	0	0	0	0	0	0	0	0	99928000	0	0	47397000	0	0	0	0	69502000	0	0	54700000	0	54646000	316950000	148180000	311490000	197390000	194650000	232190000	73455000	0	53570000	270960000	0	144050000	157690000	314290000	45895000	119430000
P14151	P14151	SELL	1064600000	2213500000	1345300000	883400000	1086000000	1130700000	1265200000	427840000	900950000	1018800000	723720000	1226600000	1555700000	871220000	1121500000	618840000	911530000	766200000	1327300000	772080000	900260000	1002000000	1470200000	1138200000	1408100000	983830000	854460000	1118600000	705080000	1642500000	1087700000	477220000	650540000	1133500000	734350000	1856700000	808560000	843300000	1116600000	1143600000	456460000	480290000	709440000	925660000	1464100000	736980000	931010000
P14174	P14174	MIF	0	0	0	0	0	0	0	128730000	0	0	97039000	0	0	82948000	0	0	98306000	0	0	0	0	0	0	0	0	0	0	0	0	0	0	36452000	0	36430000	0	0	0	0	0	59202000	0	0	0	39455000	0	0	0
P14209	P14209	CD99	0	0	0	0	0	0	0	0	0	0	0	0	0	0	0	0	0	0	0	0	0	0	0	0	0	0	0	0	0	0	0	0	0	0	0	0	0	0	0	0	0	0	0	0	0	0	0
P14314	P14314	PRKCSH	0	0	0	0	0	0	0	0	0	0	0	0	0	0	0	0	15804000	0	0	0	0	0	0	0	0	0	0	0	0	0	0	35174000	0	123190000	58551000	46372000	31160000	0	0	0	42854000	24202000	33671000	39763000	0	35514000	109020000
P14324	P14324	FDPS	0	0	0	0	0	0	0	0	0	0	0	0	0	0	0	0	0	0	0	0	0	0	0	0	0	0	0	0	0	0	0	171280000	0	0	0	0	0	0	0	0	0	0	0	0	0	0	0
P14543	P14543	NID1	207340000	228860000	72078000	202020000	112900000	177610000	148310000	155170000	90791000	0	79208000	178380000	97894000	0	172240000	157860000	53550000	0	91472000	56521000	96665000	165290000	180040000	133540000	161530000	191810000	152960000	46761000	30776000	119600000	208220000	0	88306000	183610000	162770000	361640000	370440000	458490000	208520000	0	0	119940000	107000000	358010000	300280000	326570000	180100000
P14550	P14550	AKR1A1	0	0	0	0	0	0	0	0	0	0	0	0	0	0	0	0	0	0	0	0	0	0	0	0	0	0	0	0	0	0	0	0	0	0	0	0	0	0	0	0	0	0	0	5578000	0	0	0
P14618	P14618	PKM	0	105960000	0	100500000	0	210160000	0	310510000	534440000	754230000	559620000	428440000	0	489570000	336740000	123220000	55989000	94558000	442630000	0	0	0	435780000	0	387130000	394500000	382140000	823800000	0	230970000	395550000	0	0	0	396750000	0	103940000	74724000	61642000	0	491010000	0	0	370930000	440430000	75896000	446220000
P14625	P14625	HSP90B1	115360000	404710000	166050000	0	0	485790000	215430000	87324000	0	228970000	281150000	300360000	13972000000	158610000	82312000	174750000	396230000	139500000	0	388590000	115140000	0	137080000	400840000	160190000	136880000	418060000	219590000	93745000	281510000	183040000	1281300000	0	2824400000	356100000	1275600000	1019200000	1082700000	499840000	233380000	1255400000	110440000	236570000	277050000	780830000	1989100000	2310000000
P14780	P14780	MMP9	0	66246000	49105000	0	93403000	123800000	0	0	19005000	10538000	0	53204000	43235000	0	0	0	0	0	0	0	66926000	43883000	11800000	13587000	0	0	31455000	58693000	0	0	0	98586000	0	12327000	80741000	0	293770000	152460000	21598000	1641500000	211770000	88315000	140410000	881000000	477120000	204870000	1359600000
P14923	P14923	JUP	0	0	0	0	0	0	37448000	0	0	0	0	0	69913000	61448000	0	0	0	33800000	0	0	0	0	0	0	59791000	70113000	0	104750000	0	79050000	43332000	0	0	0	0	79760000	0	60831000	0	0	92110000	0	0	59231000	0	62262000	59824000
P15085	P15085	CPA1	0	0	0	0	0	0	0	0	0	0	0	0	0	0	0	0	19023000	0	0	0	0	0	0	0	0	0	0	0	0	0	0	0	0	93484000	0	0	0	0	0	0	35855000	21524000	0	0	0	0	0
P15086	P15086	CPB1	0	0	0	0	0	0	0	0	0	0	0	0	0	0	0	0	0	0	0	0	0	0	0	0	0	0	0	0	0	0	0	0	0	0	0	0	0	0	0	0	0	0	0	0	0	0	0
P15090	P15090	FABP4	0	0	0	0	0	0	0	0	0	0	0	0	0	0	0	0	0	0	0	0	0	0	0	0	0	0	0	0	0	0	0	27555000	0	0	0	21876000	68083000	0	0	0	0	50703000	0	0	19449000	0	0
P15144	P15144	ANPEP	276180000	309340000	385410000	297360000	213470000	212020000	295780000	155360000	295700000	361960000	271160000	200740000	275180000	354780000	168010000	173900000	314470000	241630000	337750000	568490000	559460000	296980000	247370000	204990000	192930000	641290000	344920000	305130000	282070000	355230000	130920000	462370000	220800000	342360000	391940000	813920000	134200000	149640000	521450000	490940000	478870000	0	201330000	297700000	133760000	209650000	837830000
P15151	P15151	PVR	132330000	115570000	262670000	135790000	172680000	276200000	134700000	158200000	205260000	244260000	255680000	161710000	220850000	364030000	134480000	221360000	351960000	113420000	283530000	100220000	177220000	97031000	164770000	248390000	213120000	368040000	221480000	642630000	339180000	114660000	116900000	124120000	306700000	429690000	252580000	727880000	353420000	394540000	365830000	167350000	277940000	238420000	238610000	266420000	273000000	453820000	246050000
P15169	P15169	CPN1	1685800000	1606400000	1934100000	2007200000	994430000	1541800000	1681900000	2136300000	1959900000	2668200000	2211800000	1714100000	1611500000	2783900000	1743200000	1845100000	2473600000	2483200000	2341600000	1008300000	3231500000	2426300000	3007000000	1831700000	2262800000	2270500000	1078200000	1292900000	2356600000	3422300000	1848300000	1710000000	5793900000	2501500000	3784800000	1419400000	4977100000	2510300000	3991900000	3170300000	3918700000	4348900000	2848700000	2850400000	3212100000	6487200000	1808400000
P15291	P15291	B4GALT1	0	0	0	0	0	0	50922000	79439000	0	0	0	0	0	0	0	0	0	0	0	0	50893000	0	0	0	0	70195000	0	0	62085000	0	0	0	52467000	54225000	52248000	68011000	0	92017000	60536000	0	85831000	0	57148000	0	62470000	47257000	52192000
P15311	P15311	EZR	0	0	0	0	0	0	0	0	0	0	0	0	0	0	0	0	0	0	0	0	0	0	0	0	0	0	0	0	0	0	0	0	0	0	0	0	0	0	0	0	0	0	0	0	0	0	0
P15814	P15814	IGLL1	422410000	336640000	163820000	496900000	81753000	132290000	431800000	340560000	286680000	377320000	459410000	461240000	392600000	188410000	589540000	562890000	323130000	300160000	315230000	247250000	118200000	288760000	272740000	259550000	368200000	101380000	432310000	251360000	301720000	224480000	183160000	529420000	116770000	1304400000	264300000	1008000000	407780000	666960000	119270000	454250000	452490000	209250000	279690000	0	431050000	140220000	235350000
P15924	P15924	DSP	337760000	819050000	321900000	337860000	461680000	397860000	81571000	577700000	0	865390000	675120000	438440000	0	383190000	884880000	214940000	0	845890000	798060000	0	0	705610000	87894000	136470000	0	352300000	396720000	236170000	0	121000000	318480000	71392000	0	473140000	0	115900000	835450000	959410000	113430000	0	68881000	0	0	750500000	497080000	0	127270000
P16070	P16070	CD44	924230000	1034000000	1007600000	1281300000	911490000	1446000000	923030000	1280100000	1104000000	949760000	1014500000	911800000	1371700000	1461700000	1134000000	1161300000	650780000	1278100000	1156100000	1140900000	1207800000	741940000	595200000	948870000	707670000	903840000	762600000	877490000	1085600000	877420000	507080000	1151000000	858590000	845070000	1671100000	4194300000	1069100000	1442700000	1245400000	1240100000	1458800000	623320000	816910000	614820000	947120000	543760000	1053900000
P16152	P16152	CBR1	0	0	0	0	0	0	26834000	0	0	0	0	0	0	0	0	0	0	0	0	33084000	0	0	0	0	0	0	0	0	0	20747000	0	0	0	0	0	0	0	0	23358000	0	0	0	41167000	0	0	0	28369000
P16233	P16233	PNLIP	0	0	0	0	0	0	0	0	0	0	0	0	0	0	0	0	0	0	0	0	0	0	0	0	0	0	0	0	0	0	0	0	0	0	0	0	0	0	0	0	0	0	43709000	0	0	0	0
P16581	P16581	SELE	0	0	0	0	114330000	0	0	0	0	0	0	0	0	0	143170000	0	0	0	0	0	0	0	0	0	0	0	0	0	0	0	0	0	0	0	0	0	0	0	0	0	0	0	0	0	222240000	0	0
P16930	P16930	FAH	0	0	21612000	0	46635000	37080000	0	0	0	17669000	0	0	0	0	0	0	0	0	0	0	52617000	0	0	0	0	0	0	0	0	0	0	240720000	24724000	102820000	87902000	78334000	0	25367000	177110000	0	33782000	58359000	32923000	39069000	18734000	47245000	1981900000
P17066	P17066	HSPA6	0	0	0	0	0	27998000	0	0	0	0	0	0	0	0	0	0	0	0	0	0	0	0	0	0	0	0	0	0	0	0	0	59228000	0	159370000	0	0	0	0	0	0	71590000	54839000	0	0	0	0	56585000
P17174	P17174	GOT1	27020000	16385000	0	21601000	0	26796000	21792000	23059000	0	0	0	0	0	0	0	0	0	0	0	0	0	0	0	0	0	0	0	0	18145000	0	0	91102000	8656700	4359700	0	12352000	123220000	0	0	33315000	45711000	0	7920300	0	10791000	25416000	513340000
P17516	P17516	AKR1C4	0	0	0	0	0	0	0	0	0	0	0	0	0	0	0	0	0	0	0	0	0	0	0	0	0	0	0	0	0	0	0	0	0	0	0	0	0	0	0	0	0	101290000	0	0	0	0	0
P17661	P17661	DES	0	0	0	0	0	0	0	0	0	0	0	0	0	0	0	0	0	0	0	0	0	0	0	0	0	0	0	0	0	0	0	0	0	0	0	0	0	0	0	0	0	0	0	0	0	0	0
P17813	P17813	ENG	0	0	30388000	37780000	0	0	55236000	0	42711000	0	0	0	0	39742000	38297000	0	0	0	49836000	0	18849000	0	0	0	0	0	0	0	0	0	0	0	0	0	0	0	38478000	0	0	0	0	0	0	0	17144000	28476000	0
P17931	P17931	LGALS3	0	0	0	0	0	0	0	0	0	41428000	0	0	0	0	0	0	0	0	0	0	0	0	0	0	0	0	0	0	0	0	0	0	0	0	0	57101000	0	0	0	41209000	0	32759000	0	69748000	0	0	0
P17936	P17936	IGFBP3	410410000	442150000	526930000	558570000	515250000	503340000	460040000	723530000	568020000	1013700000	788990000	403710000	665660000	400960000	613920000	364860000	314000000	657460000	847500000	473780000	528870000	570130000	521930000	592870000	774700000	566820000	502980000	601110000	472780000	749500000	552800000	514920000	827000000	314450000	532560000	165830000	449240000	275910000	428870000	419400000	64669000	599470000	723800000	586110000	449420000	581040000	272730000
P18065	P18065	IGFBP2	117070000	138270000	168220000	77195000	0	184620000	89190000	623690000	81004000	0	77295000	25613000	0	201970000	50719000	546070000	46875000	52409000	0	79468000	282230000	86764000	182270000	281700000	174630000	232520000	0	477100000	181370000	99508000	155220000	1428600000	26933000	1634000000	979480000	792170000	1526200000	861080000	140280000	59101000	1656000000	372350000	277650000	798760000	91166000	208260000	189010000
P18135	P18135		7387800000	5579000000	8172900000	7273800000	5377200000	2183100000	9304600000	5958300000	8459400000	16025000000	4405100000	8706600000	6065900000	4668400000	14063000000	4069200000	5665200000	5575500000	9621900000	12118000000	6108400000	8587500000	17790000000	26116000000	11523000000	11379000000	13380000000	8322000000	3905000000	5769400000	8610100000	15435000000	10686000000	26765000000	19944000000	16227000000	12717000000	7701900000	8215200000	27618000000	18416000000	13439000000	8782800000	10658000000	10209000000	5860700000	6870400000
P18136	P18136		0	0	0	0	0	0	0	0	0	0	0	0	0	0	0	0	0	0	0	0	0	0	0	0	0	0	0	0	0	0	0	0	0	218160000	0	62689000	0	0	0	0	83646000	0	0	0	0	0	0
P18206	P18206	VCL	251130000	85615000	387500000	68234000	0	120060000	0	232650000	59860000	191820000	35042000	0	155740000	0	0	107720000	0	180230000	53564000	146690000	58480000	0	187820000	0	0	48474000	0	0	0	87470000	0	40047000	81696000	164250000	96922000	185000000	187130000	153590000	135350000	58178000	136790000	118870000	0	103760000	0	68864000	0
P18428	P18428	LBP	386940000	389800000	371430000	331650000	299490000	403190000	186880000	516680000	269160000	338000000	345370000	1613700000	442550000	442050000	448800000	340540000	253450000	396750000	328080000	266960000	190980000	510670000	494670000	524500000	299000000	104710000	291750000	378290000	171320000	209530000	276210000	1137700000	3644300000	2714200000	3097800000	3838500000	4946500000	4697500000	3648300000	4102300000	2015200000	6399400000	5189800000	4797500000	3962600000	1065800000	2804600000
P18510	P18510	IL1RN	0	0	0	0	0	0	0	0	0	0	0	0	51068000	0	0	0	0	68298000	0	100930000	0	83980000	0	0	0	0	0	0	35337000	42842000	0	73330000	0	136250000	83821000	0	92547000	74461000	0	277660000	100230000	38222000	71113000	236260000	51381000	0	0
P18669	P18669	PGAM1	0	0	0	0	0	0	12705000	7691300	0	0	0	0	0	0	15664000	0	0	14001000	0	29791000	0	0	0	0	0	0	14799000	0	0	0	0	0	0	0	0	0	0	0	0	0	0	0	0	16002000	0	0	19306000
P18827	P18827	SDC1	0	0	0	0	0	0	0	0	0	0	0	0	0	0	0	0	0	0	0	0	0	0	0	0	0	0	0	0	0	0	0	0	0	0	0	0	0	0	0	0	0	0	0	0	0	0	0
P19237	P19237	TNNI1	0	0	0	0	0	0	0	0	0	0	0	0	0	0	0	0	0	0	0	0	0	0	0	0	0	0	0	0	0	0	0	196180000	82140000	0	84879000	0	106770000	0	0	0	79575000	69005000	0	0	0	0	0
P19320	P19320	VCAM1	412690000	234120000	203590000	444530000	148860000	281910000	377920000	237300000	55358000	91714000	111460000	285340000	284130000	203510000	297730000	361590000	311010000	219670000	94281000	48625000	545120000	240180000	90347000	663670000	145320000	312230000	104750000	513720000	274090000	333060000	284540000	762030000	172360000	1329000000	1011500000	9553000000	621160000	1357000000	1307300000	87319000	1715400000	345150000	731700000	399120000	1171500000	347030000	648440000
P19652	P19652	ORM2	101000000000	83625000000	58279000000	66042000000	83784000000	86054000000	76338000000	76341000000	54624000000	34537000000	63692000000	58626000000	71042000000	86486000000	92435000000	59330000000	92489000000	72588000000	78107000000	43295000000	65807000000	79311000000	94309000000	74094000000	71406000000	68624000000	96753000000	67297000000	76402000000	64985000000	96724000000	74032000000	69335000000	122000000000	75402000000	96199000000	82271000000	102000000000	102000000000	59850000000	84830000000	106000000000	111000000000	68568000000	105000000000	91905000000	78982000000
P19823	P19823	ITIH2	188000000000	168000000000	184000000000	186000000000	190000000000	185000000000	161000000000	155000000000	173000000000	190000000000	203000000000	147000000000	176000000000	185000000000	166000000000	182000000000	168000000000	147000000000	148000000000	165000000000	271000000000	166000000000	201000000000	219000000000	217000000000	231000000000	167000000000	176000000000	172000000000	220000000000	189000000000	114000000000	101000000000	26029000000	104000000000	59716000000	111000000000	83253000000	86658000000	140000000000	87371000000	69639000000	139000000000	124000000000	135000000000	124000000000	172000000000
P19827	P19827	ITIH1	77442000000	86012000000	65069000000	81490000000	85953000000	85823000000	68102000000	68330000000	74836000000	74024000000	93851000000	60220000000	79544000000	88471000000	70919000000	72498000000	71013000000	65928000000	69688000000	64601000000	97531000000	61593000000	76088000000	77353000000	85091000000	78143000000	64028000000	66274000000	76167000000	92742000000	72017000000	53971000000	56882000000	27215000000	53711000000	24539000000	64030000000	39541000000	41006000000	57364000000	44873000000	54870000000	73616000000	57885000000	65189000000	63003000000	83285000000
P19838	P19838	NFKB1	84726000	0	93950000	98862000	125580000	100860000	169840000	362150000	160220000	591110000	95816000	295580000	159270000	113920000	141030000	362580000	677510000	193880000	193820000	279660000	145260000	234630000	0	689340000	513850000	141280000	136250000	151420000	143790000	0	89794000	0	0	101570000	0	0	0	160270000	155080000	213770000	252050000	0	0	231060000	100790000	593750000	0
P19971	P19971	TYMP	0	29799000	48097000	0	0	0	63749000	0	0	0	0	0	41922000	0	24334000	0	0	0	61551000	101000000	0	0	46049000	0	0	0	0	0	31537000	0	0	88751000	70525000	304280000	0	78254000	0	15670000	0	0	74724000	10149000	0	15015000	0	0	0
P20618	P20618	PSMB1	0	0	0	0	0	0	0	0	0	130150000	0	74669000	0	0	0	0	0	0	68831000	0	0	0	0	0	0	0	0	66155000	0	0	0	0	0	0	0	0	0	0	0	174230000	0	0	0	0	0	0	37124000
P20742	P20742	PZP	2096800000	98291000	3226000000	2489900000	13319000000	3090200000	6973300000	4957100000	129740000	10724000000	871590000	3617300000	3143100000	1019800000	7476600000	656700000	4471200000	3253000000	9836400000	25829000	5704800000	7739100000	7707100000	9847300000	7531000000	1978700000	9124400000	27101000	890820000	8027300000	17483000000	17170000000	12434000000	6473000000	12505000000	3396300000	2577700000	2945200000	19264000000	9644700000	9286600000	23492000000	2291000000	12599000000	15972000000	8682300000	3634400000
P20827	P20827	EFNA1	0	0	0	0	0	0	0	0	0	0	0	0	0	0	0	0	0	0	0	0	0	0	0	0	0	0	0	0	0	0	0	0	0	0	0	0	0	0	0	0	0	0	0	0	0	0	0
P20851	P20851	C4BPB	3165800000	3189400000	2646800000	3098300000	3517500000	2555800000	2074300000	2752300000	2857100000	3489900000	3688000000	1773300000	2565000000	1738200000	1694600000	2161100000	3702000000	2237500000	3371200000	2451900000	5353100000	2230100000	2702100000	2195600000	1914900000	1595700000	2060200000	1936800000	2765400000	4333300000	2705300000	3093900000	3429300000	1528300000	1887700000	1275000000	3405500000	1767900000	3129700000	2105400000	2356600000	4258600000	3692800000	2935800000	3665600000	4582400000	2372400000
P20962	P20962	PTMS	0	0	0	0	0	0	0	0	0	0	0	0	0	0	0	0	0	0	0	0	0	0	0	0	0	0	0	0	0	0	0	0	0	0	0	0	0	0	0	0	0	0	0	0	0	0	0
P21333	P21333	FLNA	0	0	16590000	0	0	0	0	0	0	0	0	0	0	0	0	0	0	0	0	0	0	22273000	22482000	0	0	0	0	0	0	16657000	86170000	0	0	115740000	0	235430000	61858000	20272000	0	135980000	59898000	21543000	127490000	75515000	0	0	0
P21399	P21399	ACO1	0	22424000	23083000	16610000	25344000	30546000	0	0	18730000	24866000	0	0	26498000	26463000	0	0	0	0	27283000	0	0	24064000	0	0	21874000	32665000	5273000	0	24949000	0	0	0	12092000	40176000	13965000	0	49799000	24372000	76290000	42070000	14677000	13745000	37755000	24334000	0	0	12671000
P21549	P21549	AGXT	0	0	0	0	0	0	0	0	0	35435000	0	0	0	0	76950000	0	0	0	0	0	0	10880000	10487000	0	0	0	14635000	12406000	0	10804000	0	0	0	0	11968000	0	0	0	0	0	0	13902000	0	0	0	0	7118400
P21589	P21589	NT5E	0	28623000	23587000	0	0	3855700000	24840000	23342000	36545000	0	35223000	0	0	0	30431000	0	0	17887000	0	47288000	0	0	0	0	0	0	0	63462000	44910000	34584000	0	0	0	31525000	0	0	0	0	0	0	0	29069000	0	0	0	47120000	0
P21695	P21695	GPD1	72740000	58539000	0	0	46739000	0	453610000	0	63874000	0	0	0	0	0	74285000	0	58436000	0	46533000	53415000	0	0	42162000	67467000	0	0	81004000	0	0	0	0	93858000	0	146380000	67804000	0	67946000	0	47873000	81707000	41385000	0	0	0	63804000	0	0
P22105	P22105	TNXB	355080000	233810000	171650000	169250000	163890000	632200000	100500000	235430000	75889000	583380000	221230000	257620000	278890000	200810000	198500000	159530000	193640000	277790000	248720000	236860000	265060000	195440000	153900000	239750000	193670000	360980000	123860000	307760000	181170000	173420000	79098000	235450000	142150000	188470000	54154000	585190000	97601000	221610000	156790000	171550000	179610000	549560000	130560000	210170000	461180000	78161000	326830000
P22234	P22234	PAICS	0	0	0	0	0	0	0	0	0	0	0	0	0	0	0	0	0	0	0	0	0	0	0	0	0	0	0	0	0	0	0	0	0	0	0	0	0	0	0	0	0	0	0	0	0	0	0
P22307	P22307	SCP2	0	0	0	0	0	0	0	0	0	0	0	0	0	0	0	0	0	12472000	0	0	0	0	0	0	0	0	0	0	0	0	0	22516000	0	0	0	0	0	0	0	0	0	0	0	78360000	0	0	0
P22314	P22314	UBA1	0	0	130070000	0	0	0	0	0	31126000	59257000	0	0	0	0	0	0	0	0	0	0	0	0	0	0	31755000	0	0	0	0	0	0	0	0	0	0	0	0	0	0	55004000	0	0	0	0	0	0	0
P22352	P22352	GPX3	3998400000	4488800000	4106100000	3467700000	4572100000	4709400000	4407600000	1653700000	3853200000	3185200000	6403500000	4177200000	7098600000	4609600000	4267700000	4635800000	4952700000	5756900000	4661900000	5931500000	7447000000	5808500000	3819800000	3918500000	3447600000	4714200000	2338300000	5180800000	4883900000	5129700000	2800100000	791120000	3221900000	3833300000	4571000000	10813000000	3561900000	6010800000	6131900000	3283500000	5980800000	4109600000	4196600000	2968400000	4847800000	8942300000	3382600000
P22692	P22692	IGFBP4	34926000	46178000	52815000	69139000	150260000	106760000	54878000	189290000	152970000	41973000	79656000	59752000	50250000	89397000	62849000	0	46505000	56206000	54501000	63380000	54133000	72797000	0	71572000	67538000	47009000	75745000	103730000	52309000	49303000	47576000	867960000	250850000	277100000	717860000	582110000	723100000	188480000	112150000	136530000	666580000	202280000	519710000	557950000	391390000	35082000	322280000
P22792	P22792	CPN2	9412600000	8014300000	9920000000	10002000000	8974300000	11051000000	7678000000	8113600000	8346300000	9868200000	12277000000	9101200000	7842900000	10375000000	8682200000	8524400000	11438000000	9554500000	9334100000	7258600000	14031000000	9147200000	8255600000	8503900000	9212000000	9226500000	7054100000	7487400000	11477000000	12127000000	8799100000	8728800000	14052000000	12593000000	11080000000	7512200000	11663000000	8368000000	11315000000	8636900000	11091000000	11147000000	8798300000	7199400000	8123600000	18045000000	7642100000
P22891	P22891	PROZ	891120000	498930000	1012800000	1667100000	778960000	1153900000	684590000	660490000	1151400000	291840000	2120300000	240380000	1605900000	1087700000	1505200000	860210000	747720000	1097600000	942690000	1333700000	1456300000	38506000	1117600000	441210000	1047400000	909740000	505500000	1427600000	1791200000	696020000	659450000	587670000	821910000	148340000	0	948900000	93779000	52555000	557020000	148160000	1196500000	741430000	964830000	391300000	63668000	1022900000	662950000
P22894	P22894	MMP8	0	480990000	152690000	0	0	0	56105000	0	0	0	0	0	0	0	0	0	0	0	0	0	0	0	0	0	101990000	0	0	0	0	0	0	0	49067000	0	41380000	57944000	0	0	83971000	35853000	0	66874000	43440000	62972000	147240000	32102000	79290000
P22897	P22897	MRC1	76088000	247710000	0	118500000	57552000	0	196090000	84282000	0	29920000	263470000	221790000	239530000	0	242040000	0	285500000	200180000	191870000	648880000	166380000	49891000	62033000	0	88816000	62426000	0	0	0	0	0	397080000	79754000	1181100000	282390000	6374800000	145990000	292460000	171870000	466080000	387980000	290900000	129690000	131600000	185620000	1361200000	89783000
P23083	P23083		1088100000	906720000	1026000000	1280100000	338920000	459470000	978090000	538790000	1357200000	1391600000	409450000	1214900000	1565000000	676800000	473940000	461620000	549560000	608230000	1222100000	1264300000	304520000	955850000	974670000	1506900000	490630000	819370000	1611800000	1622500000	649800000	642840000	600620000	2267200000	1408800000	8321400000	3143500000	4129000000	842110000	3815300000	2820000000	4128400000	2176600000	2800400000	2659100000	1248100000	1595000000	153430000	972230000
P23141	P23141	CES1	0	0	0	0	2261800	0	2861700	0	0	0	0	0	0	0	0	0	0	0	0	0	0	0	0	0	0	0	5151100	0	0	0	8294600	570460000	0	0	0	0	9863000	0	10862000	9993200	0	12528000	18565000	114030000	0	0	1341000000
P23142	P23142	FBLN1	6271700000	6937700000	5127300000	5375500000	6276000000	5854800000	6635900000	7945700000	4699300000	5152300000	5481500000	7007000000	5529000000	7691200000	6611800000	7013500000	4610700000	5556900000	5375000000	5924500000	7413000000	5854700000	4704900000	5985500000	5808900000	6496800000	4536800000	6660500000	3969000000	8040300000	5132500000	6427600000	3695500000	8551400000	5298100000	10866000000	3534400000	7613200000	4730800000	5524000000	9156900000	7709100000	4523200000	4388400000	7766100000	6343600000	6988900000
P23378	P23378	GLDC	0	0	0	0	0	0	0	0	0	0	0	0	0	0	0	0	0	0	0	0	0	0	0	0	0	0	0	0	0	0	0	0	0	0	0	0	0	0	0	0	0	0	0	0	0	0	0
P23381	P23381	WARS	0	0	0	0	0	0	0	0	0	0	0	0	0	0	45124000	0	35610000	0	0	0	50042000	0	28687000	55774000	0	0	0	0	0	0	0	107030000	0	0	0	0	86811000	82061000	0	0	0	0	0	0	0	0	75581000
P23470	P23470	PTPRG	113450000	86312000	62006000	86447000	137640000	85941000	70421000	47630000	58539000	87655000	81493000	245790000	99686000	136680000	45327000	46679000	46393000	147080000	36539000	104650000	92837000	93226000	63412000	66229000	60048000	380000000	68648000	50710000	74784000	49433000	74542000	80508000	0	77500000	122360000	336510000	78997000	19199000	0	96370000	100060000	76322000	0	0	30201000	0	78921000
P23526	P23526	AHCY	0	0	0	0	0	0	0	0	0	0	0	0	0	0	0	0	0	0	0	0	0	0	0	0	0	0	0	0	0	0	0	0	0	0	0	0	0	0	0	0	0	0	0	0	0	0	0
P23528	P23528	CFL1	676810000	130640000	475240000	330910000	393440000	393110000	381750000	166080000	643340000	929770000	243030000	171170000	223140000	215450000	354920000	489740000	0	363400000	556440000	1414800000	0	449540000	0	0	682040000	334160000	88035000	338500000	577980000	312510000	675380000	1086700000	442740000	638410000	683950000	155350000	0	535880000	10456000000	1284800000	557880000	312520000	827250000	341150000	84429000	618640000	0
P24158	P24158	PRTN3	0	62538000	11035000	0	308230000	52595000	65569000	0	20364000	0	0	15746000	105650000	0	78470000	46708000	7751100	31480000	11108000	0	396150000	117680000	115680000	0	0	0	152730000	206080000	0	64185000	0	185220000	264320000	647620000	627600000	816170000	283590000	1793600000	1007700000	718480000	599020000	21586000	343240000	612240000	694340000	0	842650000
P24298	P24298	GPT	0	26482000	0	0	16440000	12656000	0	0	0	0	0	0	0	0	0	0	0	0	13560000	0	0	0	0	0	0	0	0	52966000	0	0	0	0	0	58965000	32951000	25500000	0	39902000	0	0	45016000	0	0	0	366890000	0	73386000
P24387	P24387	CRHBP	140750000	101070000	0	60374000	0	63596000	163410000	0	113700000	180910000	148020000	113490000	159310000	0	87636000	0	78702000	198770000	0	128440000	78212000	80234000	97390000	97649000	108680000	174650000	62117000	143050000	45513000	84653000	0	92322000	0	0	0	0	925740000	39760000	0	50551000	0	389970000	0	0	171610000	0	115890000
P24534	P24534	EEF1B2	0	0	0	0	0	0	0	0	0	0	0	0	0	103730000	0	0	0	0	0	0	0	0	0	0	0	0	0	0	0	0	0	0	0	0	0	0	0	0	0	0	0	0	0	0	0	0	0
P24592	P24592	IGFBP6	0	0	0	33435000	0	0	36412000	235500000	67589000	0	42828000	0	46636000	33148000	34514000	0	0	43604000	34335000	0	59496000	0	0	0	0	0	0	0	0	0	0	320730000	150900000	194240000	133090000	84828000	104940000	126220000	34517000	73499000	101780000	141160000	78141000	0	41534000	0	80321000
P24752	P24752	ACAT1	0	0	0	0	0	0	85019000	0	0	0	30526000	0	0	0	0	0	0	0	0	0	0	0	0	0	0	0	0	0	0	0	90108000	0	40377000	0	0	0	0	0	0	0	0	0	85298000	0	0	0	0
P24821	P24821	TNC	40436000	0	0	0	0	0	0	0	0	0	0	0	0	0	0	0	0	73651000	0	68175000	0	0	0	0	0	49914000	0	0	0	0	0	0	54746000	157110000	102210000	202800000	65732000	70983000	105670000	169890000	0	145440000	109280000	96356000	80061000	41467000	34634000
P25311	P25311	AZGP1	59609000000	77889000000	67733000000	68438000000	58620000000	69175000000	62175000000	85727000000	69699000000	66890000000	69926000000	57496000000	81857000000	67113000000	47883000000	63180000000	59781000000	61362000000	59952000000	48195000000	83918000000	41820000000	57072000000	67102000000	66190000000	58018000000	52133000000	83843000000	71274000000	70273000000	65616000000	72051000000	43407000000	91355000000	75493000000	73460000000	68787000000	41673000000	42884000000	54515000000	62363000000	70385000000	68693000000	45154000000	43365000000	85702000000	46003000000
P25325	P25325	MPST	0	0	0	0	0	0	0	0	0	0	0	0	0	0	0	0	0	0	0	0	0	0	0	0	0	0	0	0	0	0	0	0	0	0	0	0	0	0	0	0	0	0	0	0	0	0	0
P25786	P25786	PSMA1	0	0	0	0	0	0	0	0	0	0	0	0	0	0	0	0	0	0	0	0	0	0	0	0	0	0	0	0	0	0	0	0	0	0	0	0	0	0	0	0	0	0	0	0	0	161930000	0
P25787	P25787	PSMA2	0	0	0	0	0	0	0	0	0	0	0	0	0	0	83974000	0	0	0	0	0	0	0	107210000	0	0	0	0	0	0	0	0	134270000	0	0	0	0	0	0	0	0	0	0	0	0	0	0	0
P25788	P25788	PSMA3	0	0	0	0	0	0	0	0	0	0	0	0	0	0	0	0	0	0	0	0	0	0	0	0	0	0	0	0	0	0	0	0	0	0	0	0	0	0	0	0	0	0	0	0	0	0	0
P25789	P25789	PSMA4	0	0	0	0	0	0	0	0	0	0	0	0	0	0	0	0	0	0	0	0	0	0	0	0	0	0	0	0	0	0	0	0	0	0	0	0	0	0	0	0	0	0	0	0	0	0	0
P25815	P25815	S100P	0	0	0	0	0	0	0	0	0	0	0	0	0	0	0	0	0	0	0	0	0	0	0	0	0	0	0	0	0	0	0	0	0	0	0	0	0	0	0	115780000	0	0	0	0	0	0	0
P26022	P26022	PTX3	24212000	0	0	0	21218000	0	0	0	0	0	0	0	0	27769000	0	0	0	24426000	0	0	0	0	37637000	0	0	19958000	0	24686000	0	0	0	0	37074000	90703000	0	0	29242000	122080000	0	0	128630000	84671000	149230000	45428000	182850000	0	19148000
P26038	P26038	MSN	24612000	0	0	0	10357000	0	15505000	0	0	19746000	0	41161000	0	0	14040000	15517000	23964000	0	12035000	15286000	5974800	0	0	0	0	0	44423000	36596000	0	0	0	5154400	0	0	0	16547000	12620000	16320000	0	113900000	10280000	57780000	0	20432000	19512000	6658900	27176000
P26447	P26447	S100A4	0	0	0	0	20559000	0	0	0	0	0	0	0	0	0	0	0	0	0	0	0	0	0	0	0	30936000	0	0	0	13060000	0	14365000	0	0	0	0	0	0	36321000	0	0	0	0	0	0	0	0	0
P26641	P26641	EEF1G	0	0	0	0	0	0	0	0	0	106260000	0	0	0	0	0	0	0	0	0	0	0	0	0	0	0	0	0	0	0	0	0	0	0	0	0	0	0	0	0	0	0	0	0	0	0	0	0
P26927	P26927	MST1	1114900000	1770700000	2091300000	1123500000	993510000	809080000	1678600000	1115600000	1047900000	1923900000	1812100000	752110000	1825900000	1022200000	1046900000	1141600000	1726100000	1377500000	1643600000	955340000	1486100000	848980000	1282200000	907360000	995230000	738020000	187330000	1137800000	1378800000	1646700000	1425600000	143900000	1046500000	649540000	629770000	141690000	134680000	1004300000	522390000	1356100000	1264200000	387890000	629590000	1141700000	1140800000	1127300000	1633800000
P26992	P26992	CNTFR	0	0	0	0	0	43838000	81783000	0	0	0	0	0	0	0	0	0	0	0	0	0	0	58542000	0	0	0	0	0	0	0	0	0	79580000	0	64295000	0	140100000	0	118530000	0	0	0	59568000	0	0	105200000	0	93762000
P27169	P27169	PON1	23889000000	30919000000	30721000000	30853000000	25300000000	33400000000	27198000000	18070000000	25732000000	27093000000	37251000000	28291000000	38581000000	24285000000	11443000000	25566000000	30769000000	30284000000	32057000000	31489000000	32881000000	27012000000	30416000000	25949000000	23174000000	32181000000	18820000000	24002000000	24485000000	27632000000	23700000000	11194000000	11392000000	8627800000	14534000000	4364600000	13531000000	11639000000	12576000000	22360000000	11859000000	18566000000	26275000000	18808000000	21073000000	22382000000	21863000000
P27348	P27348	YWHAQ	0	0	0	0	0	0	0	0	0	0	0	0	0	0	0	0	0	0	0	0	0	0	0	0	0	0	0	0	0	0	0	0	0	0	0	0	0	0	0	0	0	0	0	0	0	0	0
P27487	P27487	DPP4	243880000	91947000	120570000	50173000	89248000	155040000	104860000	44509000	59102000	93818000	161200000	95996000	122580000	140680000	90305000	97828000	98596000	84248000	57817000	165280000	197310000	39843000	75163000	0	127440000	85470000	0	74074000	99742000	47304000	58902000	0	0	0	0	110930000	0	46907000	0	0	0	0	0	82078000	92242000	0	78688000
P27797	P27797	CALR	51826000	88255000	0	19024000	0	0	60030000	28961000	86672000	0	19920000	0	59414000	0	0	0	0	53870000	0	0	0	0	106490000	102790000	71609000	23019000	86443000	52994000	56699000	24813000	54918000	603820000	155480000	350010000	0	161820000	179630000	77079000	0	27172000	112140000	87811000	74949000	58082000	69985000	0	109520000
P27918	P27918	CFP	426320000	456070000	660310000	771790000	474990000	573470000	561430000	578220000	616500000	827100000	349170000	314100000	480320000	363660000	685300000	307340000	548700000	364570000	609470000	237120000	419120000	423770000	609320000	281790000	543200000	537450000	543850000	451490000	395360000	502670000	428200000	441920000	514700000	278760000	531000000	725740000	423240000	199610000	778280000	499420000	465130000	430520000	129540000	962780000	510660000	341310000	759310000
P27930	P27930	IL1R2	18777000	0	0	23348000	0	0	0	0	0	0	0	0	0	0	0	0	0	0	0	0	0	0	0	0	0	0	0	39315000	0	0	0	0	0	0	0	113100000	13322000	0	0	0	0	0	0	17705000	0	0	0
P28062	P28062	PSMB8	0	0	0	0	0	0	0	0	0	0	94141000	0	0	0	0	0	0	0	0	0	0	149420000	0	0	0	0	0	0	0	0	0	0	51158000	0	0	0	0	0	0	0	0	215310000	0	0	0	107730000	27578000
P28066	P28066	PSMA5	0	0	0	0	0	0	0	0	0	55994000	0	0	0	0	0	0	0	0	0	403280000	0	210860000	0	0	0	528950000	0	225480000	0	0	408080000	0	0	144630000	0	0	0	114830000	0	0	0	0	0	0	0	0	0
P28070	P28070	PSMB4	0	0	0	0	0	0	0	0	0	0	0	0	0	0	0	0	0	0	0	0	0	0	0	0	0	0	0	0	0	0	0	0	0	183610000	0	0	0	0	0	0	0	0	0	0	89970000	0	0
P28332	P28332	ADH6	0	92291000	0	0	0	0	0	0	0	0	0	0	0	0	0	0	0	0	0	0	0	0	0	0	0	0	0	0	0	0	0	0	0	0	0	0	0	0	0	0	230690000	0	0	0	0	0	0
P28799	P28799	GRN	0	0	0	0	0	0	0	0	0	0	0	0	0	0	0	0	27334000	0	0	0	0	0	0	0	0	0	0	0	0	0	0	0	0	89480000	0	65769000	120130000	0	0	0	0	0	0	0	0	0	62901000
P28838	P28838	LAP3	175070000	139280000	0	187760000	231160000	0	0	124490000	434560000	908490000	131110000	357600000	0	0	25895000	0	63686000	272580000	570750000	308390000	246140000	151850000	0	0	0	0	164860000	0	264590000	220460000	207890000	0	76489000	0	21371000	119310000	99603000	141850000	102810000	0	91352000	90277000	106360000	210570000	0	432190000	0
P29401	P29401	TKT	0	0	0	0	0	0	0	13176000	0	0	0	0	0	0	12965000	179430000	48938000	0	56657000	0	12536000	0	0	0	0	0	0	0	0	23508000	0	17088000	62097000	117570000	70156000	63455000	0	11523000	64860000	505570000	0	45001000	0	130910000	5426900	93414000	189500000
P29622	P29622	SERPINA4	4720400000	9766600000	9310300000	5802800000	6701900000	8311800000	7046400000	6127500000	7771200000	8591500000	7203200000	4845500000	7477100000	7511300000	7633900000	6453400000	6038900000	9024900000	6874200000	9158200000	8838400000	5296800000	7986900000	5718500000	9562600000	7057800000	4572300000	10631000000	10214000000	7895500000	7201100000	3274900000	3683300000	3598600000	3039800000	1775100000	1722300000	2982100000	1438600000	4069300000	1839900000	2842700000	3651100000	5121300000	4735500000	6103400000	7729600000
P29692	P29692	EEF1D	0	145670000	357470000	0	0	0	181460000	0	0	0	197110000	167130000	0	249760000	168570000	247220000	0	0	0	251080000	0	0	0	0	0	0	119230000	0	0	0	240370000	0	0	0	0	0	0	0	0	0	0	0	0	0	0	0	0
P29966	P29966	MARCKS	0	0	0	0	0	0	0	0	0	0	0	0	0	0	0	0	0	0	0	0	0	0	0	0	0	0	0	0	0	0	0	0	0	0	0	0	0	0	0	0	0	0	0	0	0	0	0
P30039	P30039	PBLD	0	0	0	0	0	0	0	0	0	0	0	0	0	0	0	0	0	0	0	0	0	0	0	0	0	0	0	59625000	0	0	42576000	0	0	0	0	0	0	0	0	0	0	0	0	0	0	0	0
P30041	P30041	PRDX6	0	0	0	0	0	0	0	0	0	0	0	0	12343000	0	0	0	5266500	0	0	0	5638900	0	0	0	0	16510000	0	0	0	0	0	0	0	40724000	15539000	24077000	0	273420000	0	0	0	0	15459000	11476000	0	0	0
P30042	P30042	C21orf33	0	0	51635000	0	0	0	85129000	0	90133000	0	0	0	0	0	480410000	0	0	0	0	0	0	0	0	0	0	0	0	0	0	0	0	0	90615000	0	0	0	0	137240000	0	0	0	71882000	0	132480000	0	0	0
P30043	P30043	BLVRB	0	0	0	0	0	0	0	0	0	0	0	0	0	0	0	189250000	0	0	0	0	0	0	0	0	118390000	44886000	47409000	0	0	66051000	0	0	0	0	0	73046000	0	328090000	0	0	0	0	65245000	0	0	0	0
P30046	P30046	DDT	0	0	22923000	0	0	0	0	0	0	0	0	0	0	0	0	0	0	0	0	0	0	0	0	0	0	0	0	0	0	0	0	748680000	0	126190000	0	114970000	0	0	0	30339000	80032000	0	0	45288000	0	0	112600000
P30047	P30047	GCHFR	0	0	0	0	0	0	0	0	0	0	0	0	0	0	0	0	0	0	0	0	0	0	0	0	0	0	0	0	70828000	0	0	0	0	0	0	0	0	0	0	0	0	0	0	0	0	0	0
P30048	P30048	PRDX3	0	0	0	0	0	0	0	0	0	0	0	0	0	0	0	0	0	0	0	0	0	0	0	0	0	0	0	0	0	0	0	106360000	0	0	0	0	0	0	0	0	0	0	0	0	0	0	0
P30050	P30050	RPL12	0	0	0	0	0	0	0	0	0	0	0	0	0	0	0	0	0	0	0	0	0	0	0	0	0	0	0	0	0	0	0	0	0	0	0	0	0	0	0	0	0	0	0	0	0	0	0
P30084	P30084	ECHS1	0	0	0	0	0	0	0	0	0	0	0	0	0	0	0	0	0	0	0	30240000	0	0	0	31183000	0	0	0	0	32519000	39025000	0	0	0	0	0	0	0	0	0	0	0	0	0	0	0	0	0
P30085	P30085	CMPK1	0	0	0	0	0	0	0	0	0	0	0	0	0	0	0	0	0	0	0	0	0	0	0	0	0	0	0	0	0	0	0	0	0	0	0	0	0	0	0	0	0	0	0	0	0	0	0
P30086	P30086	PEBP1	0	18637000	0	0	0	0	0	0	0	0	0	0	0	0	0	0	0	0	0	0	0	0	0	0	0	0	0	0	0	0	18483000	24644000	0	0	0	0	0	0	0	0	0	0	0	503090000	0	0	19168000
P30101	P30101	PDIA3	107550000	124690000	101600000	109290000	114400000	115770000	103870000	105000000	105170000	16671000	104820000	103780000	134070000	115130000	95081000	85168000	77198000	137190000	0	87608000	138040000	113150000	118110000	99931000	122940000	82465000	84326000	136400000	122060000	98130000	117640000	0	0	0	105050000	0	23563000	0	0	87553000	0	0	0	70709000	122770000	95467000	89746000
P30508	P30508	HLA-C2	0	0	0	0	0	0	0	0	0	0	0	0	0	0	0	0	0	0	0	0	106500000	0	0	0	0	0	0	0	0	0	0	150290000	0	0	124680000	0	0	0	0	0	0	0	0	0	100270000	0	106000000
P30530	P30530	AXL	0	0	0	0	0	0	0	0	0	0	0	0	0	0	0	0	0	0	0	0	0	0	0	0	0	0	0	0	0	0	0	0	0	0	0	214320000	0	0	0	0	0	0	0	35802000	0	0	0
P30613	P30613	PKLR	0	0	0	0	0	0	179960000	0	0	185380000	0	0	69195000	0	126440000	764650000	1017900000	0	283010000	659910000	0	0	0	402900000	234340000	524520000	0	75322000	355930000	634250000	756660000	0	3910600000	414410000	0	0	0	0	0	0	0	0	0	728720000	256310000	0	537830000
P30740	P30740	SERPINB1	0	0	0	0	0	0	0	0	0	0	0	0	0	0	0	0	0	0	0	0	0	0	0	0	0	0	0	0	0	0	0	0	0	22363000	0	0	0	0	0	29866000	0	0	0	25226000	22922000	0	20062000
P31025	P31025	LCN1	0	0	0	0	0	0	0	0	0	0	0	0	0	0	0	0	0	0	0	0	0	0	0	0	0	0	0	0	0	0	0	0	0	0	0	0	0	0	0	0	0	0	0	69009000	0	0	0
P31040	P31040	SDHA	125480000	174410000	125150000	96875000	136950000	0	0	97283000	0	0	74185000	0	0	179860000	319490000	135580000	0	100660000	149730000	76577000	169840000	0	152900000	114630000	0	0	155700000	142910000	0	146000000	147530000	0	80073000	0	114300000	0	0	81172000	0	0	0	83963000	0	0	0	0	94261000
P31146	P31146	CORO1A	0	0	0	0	0	0	0	0	0	0	0	0	0	0	0	0	0	0	0	0	0	0	0	0	0	0	0	0	0	0	0	0	0	0	0	0	0	0	0	0	0	0	0	0	0	0	0
P31151	P31151	S100A7	0	0	0	0	0	0	0	0	0	0	0	0	0	0	0	0	0	0	0	0	0	0	0	0	51260000	0	93981000	0	0	0	0	92688000	0	0	0	0	0	0	0	0	58653000	0	0	0	0	0	0
P31327	P31327	CPS1	3092500	4421200	7910400	5288000	7819200	7544400	4837100	0	7922400	18602000	0	5658900	7798600	5506900	0	5178800	0	64048000	0	8360800	0	0	45160000	0	0	0	9975400	6334400	5261900	6705700	5183200	38916000	0	0	0	63019000	0	0	2836300	4329300	0	3727300	0	4208100	0	2515100	0
P31937	P31937	HIBADH	0	0	0	0	0	0	0	0	0	90635000	0	0	0	0	0	0	0	0	0	0	0	0	0	0	0	0	0	0	0	0	0	0	0	0	0	0	0	0	0	0	0	0	0	0	70795000	0	0
P31946	P31946	YWHAB	93244000	63104000	87744000	77236000	90133000	0	86205000	58593000	0	0	91226000	63609000	77666000	0	0	102340000	0	0	80921000	67726000	89482000	77680000	0	0	0	0	52852000	62645000	80057000	0	59902000	0	62687000	0	74309000	0	66603000	76446000	49249000	44510000	0	0	81984000	0	101440000	0	74436000
P32119	P32119	PRDX2	128150000	114480000	132800000	220290000	580320000	229170000	40851000	29560000	51670000	26498000	66790000	167020000	104640000	11006000	48944000	1621700000	88907000	13563000	1016300000	327780000	27360000	31976000	107850000	124180000	1286300000	244190000	375950000	245030000	782890000	275160000	615340000	25812000	39647000	588050000	31047000	2051200000	0	6037700000	29072000	2160200000	324950000	228790000	1260300000	418350000	149380000	579640000	109400000
P32754	P32754	HPD	0	29546000	0	6909700	0	0	0	0	0	0	0	0	0	13037000	0	13478000	12708000	9930600	30399000	0	8364800	0	0	0	0	9827700	0	0	0	9405200	0	104260000	0	5697900	0	10626000	0	0	20857000	17154000	0	0	37077000	32882000	32700000	0	1410500000
P32929	P32929	CTH	0	0	0	0	0	0	0	0	0	0	0	0	0	0	0	0	0	0	0	0	0	0	0	0	0	0	0	0	0	0	0	0	0	0	0	0	0	0	0	0	0	0	0	0	0	0	0
P33151	P33151	CDH5	671200000	383510000	679790000	768940000	492960000	817640000	612670000	669710000	212970000	396180000	1007300000	855680000	618460000	974460000	808270000	763490000	669520000	568050000	892250000	485710000	606880000	528700000	803840000	1062100000	355500000	1165100000	578020000	533830000	1028300000	639960000	486880000	426530000	578780000	666640000	711990000	1918700000	335930000	423950000	614640000	201670000	422650000	600520000	359200000	765080000	692500000	529710000	952660000
P33908	P33908	MAN1A1	570150000	822860000	731780000	483010000	569540000	669520000	465280000	534110000	495310000	516740000	739540000	721310000	661570000	582930000	515760000	579630000	586550000	467240000	564890000	552340000	818490000	527450000	572090000	762250000	634140000	495440000	353430000	569620000	579150000	498170000	664220000	652740000	364040000	601000000	628020000	1468300000	1092200000	717860000	503600000	623480000	939660000	1069800000	870470000	777110000	718050000	816590000	612630000
P34896	P34896	SHMT1	27011000	0	0	0	0	0	15736000	0	0	0	0	0	0	0	0	0	0	0	0	12824000	0	0	0	0	0	0	0	0	0	0	0	0	0	0	0	0	0	0	0	0	0	0	0	0	0	0	0
P34913	P34913	EPHX2	0	0	71739000	0	0	0	0	0	0	0	0	0	0	0	60767000	62599000	0	0	0	0	0	48405000	0	0	0	43780000	0	71444000	0	0	27043000	0	25785000	0	0	0	0	0	0	0	0	0	0	45420000	0	37494000	74146000
P34932	P34932	HSPA4	0	0	0	0	0	0	0	0	0	0	0	0	0	0	44558000	0	0	0	0	0	0	0	0	0	0	0	0	0	0	0	0	0	0	0	0	0	0	0	0	0	0	0	0	0	0	0	0
P35237	P35237	SERPINB6	0	0	0	0	0	0	0	0	0	0	0	0	0	0	0	0	0	0	0	0	0	0	0	0	0	0	0	0	0	0	0	0	0	0	0	0	0	0	0	0	0	0	0	0	0	0	0
P35442	P35442	THBS2	0	0	0	0	0	0	0	0	0	0	0	0	0	0	0	0	0	0	0	0	0	0	0	0	0	0	0	0	0	0	0	0	0	0	0	0	0	0	0	0	0	0	0	0	0	0	0
P35443	P35443	THBS4	79883000	123330000	0	54810000	57207000	55164000	0	53386000	44642000	0	85601000	0	40899000	51624000	109850000	71166000	63665000	23809000	0	77519000	0	60712000	58279000	35020000	0	167220000	0	42286000	22265000	96600000	0	0	254430000	0	0	63196000	52017000	42679000	237980000	79643000	705360000	142770000	93686000	718410000	42068000	54708000	53023000
P35542	P35542	SAA4	5051500000	8859200000	9094600000	7380200000	10083000000	6785000000	8821900000	6533200000	8001700000	4080100000	11719000000	8565100000	10443000000	7273300000	10475000000	5950000000	6859900000	6785200000	5321400000	6252200000	6231800000	6692800000	13127000000	9156200000	7798500000	6312200000	7311600000	13175000000	7916700000	6499100000	6519100000	5273100000	12489000000	3829800000	3025000000	2184000000	4529400000	3755900000	5237300000	4331600000	3298500000	9021900000	7952700000	7409600000	6749500000	12868000000	10262000000
P35558	P35558	PCK1	0	0	0	0	0	0	0	0	0	0	0	0	0	0	0	0	0	0	36435000	0	0	0	0	0	0	0	0	0	0	0	0	0	0	0	0	0	0	0	0	0	0	0	0	0	0	0	0
P35573	P35573	AGL	0	0	0	0	0	0	0	0	0	0	0	0	0	80478000	0	0	0	0	0	84031000	0	0	0	0	68640000	0	0	0	0	0	0	0	0	0	0	0	85422000	0	86098000	0	68526000	0	0	0	0	65120000	0
P35858	P35858	IGFALS	3446600000	5702700000	4990300000	6712900000	5712300000	4871700000	3954900000	3259900000	5261700000	6566700000	6369100000	4227600000	5370200000	3386100000	4384200000	3578700000	3672200000	5716500000	5773600000	5034800000	4572100000	5787100000	3871700000	4158900000	6027500000	5630200000	3328100000	3837200000	5218400000	5994400000	3716100000	1798000000	2699800000	683830000	1927900000	202860000	1135600000	1629400000	1887400000	3155900000	52820000	1822700000	3529100000	3726600000	2361600000	2637400000	1886200000
P35916	P35916	FLT4	0	16655000	23743000	17660000	0	0	0	0	0	0	19203000	21938000	0	0	0	0	0	25020000	25136000	21945000	0	0	20714000	0	0	0	0	0	0	19953000	0	0	0	26944000	0	0	0	0	0	0	0	0	0	0	0	0	0
P36222	P36222	CHI3L1	0	0	0	0	0	0	66200000	0	0	0	0	0	0	0	0	0	46881000	0	0	0	0	0	0	0	0	0	32621000	0	0	56914000	0	0	300210000	49378000	0	0	261220000	34866000	0	524600000	265380000	91075000	109710000	462550000	731530000	0	437760000
P36871	P36871	PGM1	0	0	0	0	0	0	0	0	0	0	0	0	15000000	0	0	0	0	0	16410000	0	0	0	0	0	0	0	10217000	0	0	0	0	0	34680000	24185000	28696000	26733000	0	30181000	24167000	36107000	29444000	24934000	32098000	0	0	0	13471000
P36955	P36955	SERPINF1	6740600000	8029700000	5417800000	6188800000	5696300000	7200800000	6092400000	9201500000	7639400000	6635800000	5924600000	4336400000	6399600000	4998200000	7434200000	3970400000	3482600000	7448700000	7375600000	5958000000	4433800000	3694100000	5597000000	5030800000	7241900000	4955800000	4228300000	5774600000	6709000000	4330500000	4465000000	4675300000	10698000000	6314700000	6392900000	3614300000	9416600000	6326900000	6692300000	7337600000	6298400000	9697300000	6667000000	6267600000	5921400000	4616900000	7822000000
P36980	P36980	CFHR2	462500000	684450000	332460000	580730000	236360000	713980000	325400000	544030000	778190000	325120000	1068400000	773230000	126190000	552980000	213460000	653860000	450220000	652550000	217080000	651590000	260760000	296560000	339970000	406570000	343770000	155050000	222330000	1081700000	610380000	399690000	232460000	1484200000	1178800000	1080300000	2222400000	221220000	688140000	626780000	415720000	886150000	281170000	957950000	1415400000	236630000	664980000	444930000	180680000
P37802	P37802	TAGLN2	0	0	127880000	51930000	0	56028000	0	67361000	0	0	33273000	0	0	0	122990000	121400000	142480000	58550000	59186000	0	80475000	0	79432000	45183000	118180000	146810000	0	106100000	80102000	96016000	234810000	0	0	85736000	200190000	0	419330000	74627000	0	0	224190000	0	0	258060000	118660000	67184000	46715000
P37837	P37837	TALDO1	84750000	46257000	79516000	62032000	28873000	19203000	74132000	69337000	22394000	71595000	69848000	0	63152000	59477000	0	0	51526000	68554000	56011000	71750000	27159000	0	0	0	0	0	0	24872000	0	0	0	30589000	0	97886000	82216000	148280000	72911000	123890000	77378000	241320000	109890000	32821000	96057000	62291000	36043000	95162000	29767000
P37840	P37840	SNCA	61824000	185720000	151560000	107690000	58900000	48437000	59672000	0	105860000	117720000	90489000	83896000	363990000	0	62788000	1046100000	150390000	201710000	75756000	164730000	25977000	0	0	52970000	132530000	0	0	207920000	142550000	54579000	0	0	0	201250000	0	0	396910000	370950000	0	102290000	248050000	0	54770000	68972000	263420000	60209000	0
P38117	P38117	ETFB	0	0	0	0	0	0	0	0	0	0	0	0	0	0	0	0	0	0	0	0	0	0	0	0	0	0	0	0	0	0	0	0	0	0	0	0	0	0	0	0	0	0	0	0	0	0	110940000
P38646	P38646	HSPA9	0	0	0	0	0	0	134000000	0	0	0	0	0	0	0	0	0	0	0	0	0	0	0	0	0	0	0	0	0	0	0	0	0	0	0	0	0	0	0	0	0	0	0	0	0	0	0	0
P39060	P39060	COL18A1	0	0	0	0	0	0	0	0	0	0	0	0	56429000	0	0	0	0	0	0	0	0	0	0	0	0	38054000	0	0	0	0	0	79270000	0	0	0	0	0	0	0	0	0	0	0	0	0	0	0
P40189	P40189	IL6ST	52698000	94273000	98193000	106260000	59997000	61981000	131730000	33265000	101420000	41757000	98935000	62725000	78890000	148470000	34754000	102310000	0	104060000	0	116480000	0	143130000	69567000	92444000	95123000	59877000	99981000	171960000	112250000	82636000	114740000	98781000	168280000	104100000	94618000	432940000	72845000	58092000	0	0	73099000	103760000	179510000	92422000	119420000	50821000	41730000
P40197	P40197	GP5	148540000	182250000	170980000	157190000	187350000	295150000	224920000	171250000	134130000	141230000	735090000	285920000	307600000	93201000	230110000	178520000	67782000	870700000	277900000	102190000	476680000	89319000	216820000	471250000	355950000	131320000	123940000	199480000	480190000	303080000	100910000	0	58033000	133240000	0	122700000	272460000	170360000	45481000	367730000	0	197380000	161030000	227490000	87513000	170230000	112180000
P40261	P40261	NNMT	0	0	0	0	0	0	0	0	0	0	0	0	0	0	0	0	0	0	0	0	0	0	0	0	0	0	0	0	0	0	0	0	0	0	0	0	0	0	0	0	0	0	0	0	0	0	0
P40925	P40925	MDH1	0	0	0	0	0	0	8333100	0	0	0	0	0	13600000	0	12928000	0	0	0	0	0	0	0	0	0	0	0	0	0	0	0	0	0	0	0	0	0	0	0	0	0	0	0	0	0	0	0	10820000
P41159	P41159	LEP	0	55730000	0	0	0	0	0	0	0	0	0	0	0	0	0	0	0	0	0	0	0	0	0	0	0	0	0	0	0	0	0	0	0	0	0	0	0	0	0	0	0	0	0	0	31844000	0	0
P41222	P41222	PTGDS	95374000	64612000	0	0	0	0	62479000	259900000	91713000	0	125120000	119370000	0	51998000	51449000	0	126350000	137680000	72106000	0	0	49526000	73580000	85993000	82325000	132320000	119750000	126690000	78334000	93742000	108560000	903580000	105210000	564730000	795280000	107690000	270730000	151770000	123910000	0	269680000	108380000	244560000	270100000	353270000	57844000	371930000
P42126	P42126	ECI1	0	0	0	0	0	0	31344000	0	0	0	0	0	0	0	0	0	0	0	0	0	0	0	0	0	0	0	0	0	0	0	0	0	0	0	0	0	0	0	0	0	0	0	0	0	0	0	110350000
P42765	P42765	ACAA2	0	0	0	0	125350000	0	170270000	161530000	0	0	0	0	128430000	0	0	191090000	109740000	152300000	145970000	0	0	0	0	42577000	0	161930000	0	217940000	0	140640000	42924000	94714000	0	0	0	0	0	0	0	0	0	0	0	0	0	23657000	38749000
P42785	P42785	PRCP	0	0	0	0	0	0	0	0	0	0	0	0	0	0	0	0	0	0	0	0	0	0	0	0	0	0	0	0	0	0	0	0	0	0	0	0	0	0	0	0	0	0	0	0	0	0	0
P43121	P43121	MCAM	70953000	104090000	87424000	88234000	106990000	64660000	96693000	79758000	50457000	0	40746000	101340000	0	0	101510000	173530000	0	68662000	74283000	87851000	77500000	123670000	47430000	73575000	57073000	80029000	73879000	123520000	52270000	95191000	0	87610000	0	98845000	79083000	442500000	57960000	92220000	56626000	0	235510000	112520000	61654000	54008000	114010000	54884000	48560000
P43251	P43251	BTD	2951800000	1614600000	2916400000	2972300000	2996200000	2984300000	3534200000	2166400000	3077400000	2393400000	3458300000	2652500000	2811700000	2870000000	3181200000	2920200000	2926700000	1831900000	2788400000	3867800000	2830800000	2987200000	2574200000	2652600000	2470100000	2719700000	1881600000	2588700000	3910900000	2629900000	2689700000	2967600000	2278300000	2284900000	2550200000	2312200000	2503400000	1813400000	2530200000	2252800000	2296100000	4088600000	2311400000	1754700000	2539200000	3620000000	1929600000
P43490	P43490	NAMPT	0	0	0	0	0	0	0	0	0	0	0	0	0	0	0	0	0	0	0	0	0	0	0	0	0	0	0	0	0	0	0	0	0	0	0	33476000	0	0	0	0	0	0	0	0	0	0	0
P43652	P43652	AFM	69639000000	69796000000	51551000000	64475000000	61183000000	70945000000	64010000000	39240000000	56960000000	58700000000	59725000000	56909000000	70646000000	58767000000	65948000000	77320000000	52333000000	87360000000	67008000000	79741000000	69446000000	69418000000	49624000000	64425000000	56338000000	74908000000	47198000000	43253000000	63117000000	50778000000	54286000000	31393000000	33358000000	18589000000	26458000000	47260000000	25065000000	31047000000	29457000000	42998000000	29224000000	27447000000	50450000000	44964000000	50040000000	38485000000	64732000000
P46952	P46952	HAAO	55881000	111270000	0	0	0	0	0	0	156930000	129470000	97505000	0	0	0	0	0	0	0	96937000	219360000	0	0	0	0	0	159620000	0	0	0	101300000	0	0	0	0	0	0	0	0	0	0	0	0	0	0	0	0	0
P47756	P47756	CAPZB	359850000	709560000	449080000	188510000	370040000	202800000	241890000	356700000	359690000	267740000	550090000	332540000	562560000	204760000	340880000	371640000	331840000	451350000	549930000	412910000	295760000	385710000	374420000	527430000	0	0	357750000	389730000	285170000	322420000	431820000	226050000	100000000	511970000	152810000	366530000	163870000	461860000	158720000	215830000	198300000	193520000	163880000	341880000	664860000	88217000	650390000
P47929	P47929	LGALS7	0	0	0	0	0	0	0	47727000	0	0	0	0	0	0	0	0	0	0	0	0	0	0	0	0	0	0	0	0	0	0	0	0	0	0	0	0	0	0	0	0	0	0	0	0	0	0	0
P47989	P47989	XDH	0	0	0	0	0	0	0	0	0	0	0	0	0	0	0	0	0	0	0	0	0	0	0	0	0	0	0	0	0	0	0	0	0	0	0	0	0	23570000	0	0	49921000	0	0	0	0	0	0
P48163	P48163	ME1	0	0	0	0	0	0	0	0	0	0	0	0	19112000	0	0	0	0	0	0	0	0	0	0	0	18792000	0	0	0	0	0	0	0	0	0	0	0	0	0	0	0	0	0	0	0	0	0	0
P48304	P48304	REG1B	0	0	0	0	0	0	0	0	0	0	0	0	0	0	0	0	0	0	0	0	0	0	0	0	0	0	0	0	0	0	0	0	0	0	0	463140000	197340000	307420000	0	0	0	389840000	737430000	0	88748000	0	264740000
P48506	P48506	GCLC	0	0	0	0	0	0	0	0	0	0	0	0	0	0	0	0	0	0	0	0	0	0	0	0	0	0	0	0	0	0	0	0	0	0	0	0	0	0	0	0	0	0	0	0	0	0	0
P48740	P48740	MASP1	1173900000	477550000	846310000	907650000	573070000	837830000	923610000	635540000	887710000	1120600000	1307300000	531530000	1599100000	715510000	641150000	446140000	795790000	861770000	902410000	990280000	844790000	601720000	471230000	768520000	618690000	1065200000	800640000	567000000	1271400000	1020300000	434360000	506800000	1105400000	564800000	616300000	942020000	744800000	673180000	460600000	391110000	121110000	932310000	715590000	337150000	225300000	1484000000	545120000
P48788	P48788	TNNI2	0	0	0	0	0	0	0	0	0	0	0	0	0	0	0	0	0	0	0	0	0	0	0	0	0	0	0	0	0	0	0	0	0	0	0	0	0	0	0	0	0	0	0	0	0	0	0
P48960	P48960	CD97	0	0	0	0	0	0	0	0	0	0	0	0	0	0	0	0	0	0	0	0	0	0	0	0	0	0	0	0	0	0	19069000	0	0	0	0	0	0	0	0	0	0	0	0	24787000	14869000	0	0
P49189	P49189	ALDH9A1	43514000	0	74819000	136070000	0	0	0	0	0	0	0	72541000	57788000	0	0	0	0	86769000	0	66833000	77310000	110440000	71486000	0	0	0	118160000	63660000	0	0	0	0	0	92959000	51951000	103350000	0	0	0	0	58291000	53507000	73398000	0	28900000	0	86231000
P49257	P49257	LMAN1	0	0	0	0	0	0	0	0	0	0	0	0	0	0	0	0	0	0	0	0	0	0	0	0	0	0	0	0	0	0	0	0	0	0	0	0	0	0	0	0	0	0	0	0	0	0	0
P49721	P49721	PSMB2	80841000	135030000	0	66813000	0	0	45804000	0	0	0	0	0	99137000	0	0	70252000	102600000	0	0	119140000	69628000	0	156870000	114250000	149280000	92472000	130760000	71563000	0	0	107790000	40217000	57895000	124610000	0	0	62758000	0	68293000	0	0	107520000	0	0	95635000	0	30280000
P49747	P49747	COMP	651120000	773530000	474150000	239230000	555010000	594610000	447910000	471410000	402890000	345860000	381720000	536400000	563160000	453350000	528740000	604780000	643560000	478450000	584240000	654840000	871540000	446650000	460940000	338290000	1201300000	944990000	1072200000	865450000	600710000	559600000	208560000	925570000	835690000	319930000	95764000	540650000	346500000	764390000	159830000	273470000	4273300000	1695400000	205170000	953380000	855130000	121750000	523350000
P49773	P49773	HINT1	0	0	0	0	0	0	0	0	0	0	0	0	0	0	0	0	0	0	0	0	0	0	0	0	0	0	0	0	0	0	0	0	0	0	0	0	0	0	0	0	0	0	0	26104000	0	0	0
P49908	P49908	SEPP1	1936500000	2212800000	1573800000	2184200000	1697900000	1923300000	1982300000	1095800000	1937400000	1798100000	2205400000	1654000000	2124000000	2894300000	1844900000	1898300000	1575100000	2254800000	1785600000	3271600000	1701200000	1685700000	1513300000	1950000000	1549600000	1531400000	1270400000	1754800000	2314900000	2592600000	1434200000	468220000	719230000	1264600000	1704100000	899020000	768940000	584630000	632170000	1318700000	1209800000	831960000	905980000	1168100000	987800000	2376800000	962460000
P49913	P49913	CAMP	58097000	58104000	0	151510000	72307000	65638000	0	0	79350000	0	0	118530000	0	24118000	0	0	0	0	0	0	27172000	0	0	0	0	0	0	0	0	0	0	0	120710000	0	0	136450000	0	0	0	0	0	0	0	332670000	46802000	0	513300000
P50053	P50053	KHK	0	0	0	0	0	0	0	0	0	0	0	0	0	0	0	24668000	0	0	0	0	0	0	0	0	0	0	0	0	0	0	0	0	0	0	0	0	0	0	0	0	0	0	0	0	0	0	0
P50395	P50395	GDI2	26591000	29129000	0	31070000	0	0	25028000	30829000	0	0	0	0	0	24744000	0	26352000	24498000	0	28978000	0	0	0	0	26493000	7199500	0	0	0	0	0	0	0	0	78342000	0	0	23308000	0	0	42619000	0	0	0	0	0	0	21041000
P50440	P50440	GATM	0	0	0	0	0	0	0	0	0	0	0	0	0	0	0	0	0	0	18214000	0	0	0	0	0	0	21896000	0	0	0	0	0	0	0	26930000	0	0	0	0	0	36806000	81230000	26687000	0	0	0	0	0
Q8IZP2	Q8IZP2	ST13P4	0	0	0	0	0	0	0	0	0	0	0	0	0	0	0	0	0	0	0	0	0	0	0	0	0	0	0	0	0	0	0	0	0	0	0	0	0	0	0	0	0	0	0	0	0	0	0
P51161	P51161	FABP6	0	0	0	0	0	0	0	0	0	0	0	0	0	0	0	0	0	0	0	0	0	0	0	0	0	0	0	0	0	0	0	22750000	0	0	0	0	0	0	0	36920000	18155000	0	0	1309700000	0	0	0
P51687	P51687	SUOX	0	0	0	0	0	0	0	0	0	0	0	0	0	0	0	0	0	0	0	0	0	0	0	0	0	0	0	0	0	0	0	0	0	0	0	0	0	0	0	0	0	0	0	0	0	0	0
P51884	P51884	LUM	17711000000	17544000000	16450000000	16694000000	16730000000	18441000000	16569000000	15066000000	16010000000	12640000000	18382000000	15877000000	16292000000	21037000000	18015000000	25210000000	12800000000	20846000000	19186000000	17082000000	16641000000	15129000000	12416000000	15766000000	18117000000	16239000000	13053000000	10851000000	17137000000	16556000000	14759000000	31764000000	10390000000	20952000000	12644000000	26315000000	12325000000	20764000000	9043000000	12962000000	28752000000	25046000000	12028000000	10861000000	13280000000	5481100000	11795000000
P52209	P52209	PGD	0	0	0	0	0	0	0	0	0	0	0	60783000	0	0	0	0	0	0	0	0	0	0	0	0	0	0	0	0	0	0	0	0	0	0	0	38958000	0	148850000	0	59118000	0	0	0	0	0	0	0
P52565	P52565	ARHGDIA	0	0	0	0	0	0	0	0	0	0	0	0	0	0	0	0	0	0	0	0	0	0	0	28671000	0	0	0	0	0	0	0	0	0	0	0	0	0	0	0	35804000	0	0	0	23040000	0	0	0
P52566	P52566	ARHGDIB	0	0	0	0	0	0	0	0	0	0	0	0	0	0	0	0	0	0	0	0	0	0	0	0	0	0	0	0	0	0	0	0	48693000	69924000	0	0	0	0	0	173830000	37343000	110330000	0	74575000	0	0	0
P52758	P52758	HRSP12	0	0	0	0	0	0	0	0	0	0	0	0	0	0	0	0	0	0	0	0	0	0	0	0	0	0	0	39732000	0	0	0	83525000	0	0	0	0	0	0	0	0	0	0	0	0	0	0	0
P52790	P52790	HK3	0	0	0	0	0	0	0	0	0	0	0	0	0	0	0	0	0	0	0	0	0	0	0	0	0	0	0	0	0	0	0	0	0	0	0	0	0	0	0	0	0	0	0	0	0	0	0
P52823	P52823	STC1	0	0	0	0	0	0	0	0	0	0	0	0	0	0	0	0	0	0	0	0	0	0	0	0	0	0	0	0	0	0	0	0	0	0	0	0	0	0	0	0	0	0	0	0	0	0	0
P52907	P52907	CAPZA1	0	0	0	0	0	0	0	0	0	0	0	0	0	0	0	69493000	0	0	0	0	0	0	0	0	0	0	0	0	67943000	0	0	0	0	0	134470000	0	0	0	0	162050000	0	0	0	0	0	0	0
P53004	P53004	BLVRA	0	0	0	0	0	0	0	0	0	0	0	0	0	0	0	0	0	0	0	0	0	0	0	0	0	0	0	0	0	0	0	0	0	0	0	0	0	36941000	0	0	0	0	0	0	0	0	0
P54108	P54108	CRISP3	464020000	577000000	416240000	391320000	445650000	415520000	399090000	291140000	460080000	453740000	225610000	580160000	623350000	299150000	563430000	230450000	453680000	327140000	726340000	377640000	583970000	711890000	773090000	670170000	670490000	582300000	351010000	579920000	275130000	1165000000	471860000	418800000	369450000	509840000	552630000	541280000	798490000	378290000	749190000	811860000	288720000	263680000	236230000	515540000	792700000	460750000	1104000000
P54289	P54289	CACNA2D1	0	28369000	0	0	0	0	0	0	0	0	0	18967000	46583000	0	0	0	0	0	0	0	22330000	0	38995000	0	23077000	0	0	0	0	0	0	0	0	0	0	32012000	0	0	0	0	0	0	0	0	0	0	0
P54802	P54802	NAGLU	15153000	0	22874000	14520000	0	0	41632000	0	0	23324000	0	23392000	16047000	0	0	0	18682000	24555000	0	23464000	33112000	0	0	0	0	0	0	0	29145000	0	0	0	0	0	0	35946000	0	0	0	0	41019000	0	0	0	0	0	31187000
P54868	P54868	HMGCS2	0	0	0	0	0	0	0	0	0	0	0	0	0	0	0	0	0	0	0	0	0	0	0	0	0	0	0	0	0	0	0	0	0	0	0	0	0	0	0	0	0	0	0	0	0	0	0
P55056	P55056	APOC4	178070000	428960000	283600000	365700000	479870000	1090000000	401010000	203240000	387150000	1097600000	827470000	190630000	313240000	180230000	198420000	193320000	750870000	460180000	525660000	492700000	162250000	305390000	2226100000	382890000	297690000	195550000	534530000	402510000	1457600000	540660000	182130000	0	546820000	0	0	205040000	0	0	45140000	206860000	0	158530000	91381000	253950000	114640000	0	258460000
P55058	P55058	PLTP	714140000	584130000	1172100000	581170000	879210000	823530000	686650000	620020000	732000000	955750000	734870000	890540000	933640000	763950000	429890000	922110000	597800000	925930000	698160000	866440000	828920000	650680000	596930000	813720000	612630000	857830000	663000000	988370000	697400000	637130000	578950000	753630000	836410000	337330000	846960000	2482900000	558820000	1128400000	1260700000	754050000	548880000	745410000	656670000	1011000000	891820000	734740000	839360000
P55103	P55103	INHBC	76863000	60200000	50773000	102040000	60340000	81821000	80564000	74439000	64744000	0	64627000	86722000	90614000	88116000	94839000	0	55420000	78826000	102030000	0	65299000	89709000	88265000	110580000	95735000	120180000	83731000	68263000	125220000	49249000	97532000	90420000	73258000	0	68183000	121160000	41049000	108260000	45169000	0	0	70155000	0	74175000	77260000	0	43217000
P55285	P55285	CDH6	0	0	0	0	0	0	0	0	0	0	0	0	0	0	0	0	0	0	0	0	0	0	0	0	0	0	0	0	0	0	0	0	0	0	0	0	0	0	0	0	0	0	0	0	0	0	0
P55290	P55290	CDH13	156740000	168280000	144830000	113240000	160270000	136930000	143110000	92747000	135230000	129860000	216300000	163400000	203680000	199360000	116530000	212040000	58385000	220680000	116270000	212420000	183170000	124050000	167360000	199070000	140300000	149320000	126400000	201060000	116500000	91515000	157640000	163670000	60431000	0	81725000	260920000	0	159210000	74448000	138730000	73108000	154910000	164090000	84782000	124000000	84421000	89167000
P56537	P56537	EIF6	0	0	0	0	0	0	0	0	0	0	0	0	0	0	0	0	0	0	0	0	0	0	0	0	0	0	0	0	0	0	0	0	0	0	0	0	0	0	0	0	0	0	0	0	0	0	0
P58166	P58166	INHBE	35508000	0	0	0	0	0	0	0	0	41527000	0	0	0	0	45071000	0	83641000	0	0	0	0	0	0	0	55408000	0	0	0	0	25611000	0	0	0	62369000	149830000	34930000	0	0	43833000	0	0	30111000	0	0	81052000	264980000	65950000
P59666	P59666	DEFA3	119850000	593270000	461220000	321320000	523680000	433810000	229520000	184890000	0	186600000	123960000	164470000	82551000	150410000	358880000	243580000	587530000	132070000	644170000	0	0	0	79953000	221590000	253210000	0	391490000	194400000	0	0	206760000	469320000	691910000	295250000	940510000	685010000	1181500000	1233200000	1168100000	2225200000	1988700000	0	0	1431100000	1693600000	334280000	2832600000
P60174	P60174	TPI1	0	11285000	0	0	12534000	0	0	0	0	0	0	0	0	0	0	5041900	0	0	4880100	0	42961000	0	0	0	13417000	21247000	0	0	1271700	0	0	0	3310100	0	0	8431100	0	45765000	0	48529000	0	3623300	0	75320000	0	0	2891200
P60660	P60660	MYL6	0	0	0	0	0	0	0	0	0	0	0	0	0	0	0	0	0	0	0	0	0	0	0	0	0	0	0	0	0	0	0	0	0	85018000	0	0	0	0	0	72574000	0	0	0	0	0	0	0
P60709	P60709	ACTB	1898900000	1062400000	1982300000	1897600000	2441600000	1925500000	1790400000	1042600000	1540500000	1917500000	1767000000	1399500000	1345900000	1533800000	2319700000	2314100000	1077000000	997530000	3105900000	1740700000	1687800000	1207000000	1422400000	1290100000	2176600000	2629500000	1495700000	1690800000	2029600000	1449100000	2197800000	5886400000	2111300000	10705000000	2302200000	9841100000	3266000000	7358400000	2826600000	15311000000	8236000000	5556200000	2091100000	3071800000	3308600000	2165600000	4108000000
P60900	P60900	PSMA6	0	0	16278000	0	0	0	0	0	0	50673000	0	0	0	0	0	0	0	0	0	0	0	0	0	0	0	0	0	0	0	0	0	0	0	0	0	0	0	30387000	0	0	0	0	0	0	0	23149000	0
P60985	P60985	KRTDAP	24489000	20175000	17703000	38671000	0	0	18168000	0	24700000	0	22948000	28721000	31461000	0	19600000	24137000	0	35128000	0	30622000	0	32126000	29517000	0	22575000	0	0	24074000	35922000	22158000	0	0	0	0	11472000	0	0	0	0	0	0	50745000	0	0	0	0	20437000
P61160	P61160	ACTR2	0	0	0	0	0	0	0	0	0	0	0	0	0	0	0	0	43567000	0	0	0	0	0	0	0	0	0	0	0	0	0	0	0	0	0	0	0	0	0	0	0	0	0	0	0	0	0	0
P61457	P61457	PCBD1	0	0	0	0	0	0	0	0	0	0	0	0	0	0	0	0	0	0	0	0	0	0	0	0	0	0	0	0	0	0	0	0	0	0	0	0	0	0	0	0	0	0	0	0	0	0	19486000
P61604	P61604	HSPE1	0	0	0	0	0	0	0	0	0	0	0	0	0	0	0	0	0	0	0	0	0	0	0	0	0	0	0	0	0	47804000	0	0	0	0	0	0	0	0	0	0	0	0	0	0	0	0	53447000
P61626	P61626	LYZ	0	0	0	0	0	0	0	144320000	0	0	0	0	0	0	0	0	0	0	0	0	0	0	0	0	0	0	0	0	0	0	0	133470000	53271000	0	0	144990000	168850000	0	52046000	0	41335000	0	55741000	927410000	39411000	0	113150000
P61769	P61769	B2M	2235300000	1362200000	2381800000	2944700000	2231100000	2177100000	1736300000	12121000000	2612900000	2524700000	1841800000	1631700000	1700100000	1968700000	2057200000	1997400000	576810000	2564800000	2235800000	1816100000	1035500000	1936400000	1265200000	2536400000	1906800000	2346300000	1941800000	2793500000	2354900000	1588600000	2364000000	24996000000	6046000000	7130400000	12499000000	11539000000	16563000000	10674000000	3875900000	4291700000	4802800000	3262900000	6124300000	7016500000	5915900000	2207800000	3723100000
P61916	P61916	NPC2	0	0	0	23284000	0	0	0	81486000	0	0	0	0	0	0	0	0	0	0	0	0	0	0	0	0	0	0	0	0	0	0	0	168020000	0	97818000	0	187920000	164120000	69374000	0	0	132580000	0	50523000	106610000	35060000	0	0
P61981	P61981	YWHAG	0	0	0	0	0	0	0	330330000	0	0	0	0	0	0	0	0	0	0	0	0	0	0	0	0	0	0	0	0	0	0	0	0	0	0	0	0	0	0	0	0	0	0	0	0	0	0	0
P62158	P62158	CALM1	0	0	0	10535000	0	0	0	0	16382000	13167000	27643000	0	0	0	11089000	18542000	0	0	15951000	0	13205000	0	8379300	0	26932000	0	0	8285500	0	29718000	0	55345000	0	58513000	0	199530000	0	55939000	0	244940000	33540000	0	0	256000000	20681000	0	18552000
P62258	P62258	YWHAE	0	0	0	3931200	0	0	0	0	0	0	0	0	0	0	0	0	0	0	0	0	0	0	0	0	0	0	0	0	0	0	0	0	0	0	72341000	0	28480000	0	0	75201000	0	42122000	14191000	0	0	0	12598000
P62328	P62328	TMSB4X	250450000	0	166330000	442260000	412420000	408850000	216270000	426490000	108050000	82584000	428830000	146620000	241160000	129330000	372630000	490560000	0	0	317890000	144190000	205750000	0	395870000	164470000	729980000	915560000	520900000	454480000	885120000	769860000	1679800000	1219000000	0	3347300000	473780000	1307900000	1228700000	671040000	114080000	1629500000	771600000	378950000	366500000	2102300000	441470000	177300000	689820000
P62805	P62805	HIST1H4A	0	0	0	0	0	0	0	0	0	0	0	0	0	0	0	0	0	0	0	0	0	0	0	0	0	0	0	0	0	0	0	0	0	194440000	0	0	0	0	0	0	0	0	0	118480000	89858000	40558000	0
P62857	P62857	RPS28	0	0	0	0	0	0	0	0	0	0	0	0	0	0	0	0	0	0	0	0	0	0	0	0	0	0	0	0	0	0	0	0	0	0	0	0	0	0	0	0	0	0	0	0	0	0	0
P62937	P62937	PPIA	0	16673000	0	0	0	0	0	0	0	0	0	0	0	0	12914000	74168000	21537000	0	46242000	0	0	0	21000000	0	52138000	25731000	0	0	0	0	56086000	28574000	0	67547000	0	0	0	81524000	0	127050000	0	40869000	12536000	81886000	0	0	25417000
P62942	P62942	FKBP1A	0	0	0	0	52267000	0	0	0	0	0	0	0	0	0	0	0	0	0	0	0	0	0	0	0	0	0	0	0	0	0	0	0	0	194610000	0	0	75361000	0	0	0	0	0	0	0	0	33030000	0
P63104	P63104	YWHAZ	27427000	187110000	86207000	44084000	72821000	0	108500000	97825000	26508000	77665000	63715000	157060000	0	0	0	109660000	9884800	67993000	0	49458000	159970000	0	49423000	295230000	57312000	69339000	88086000	59667000	0	0	51755000	0	0	356040000	0	132320000	493010000	460720000	133610000	565550000	353530000	450380000	53048000	169210000	75174000	0	241230000
P63241	P63241	EIF5A	0	0	0	0	0	0	0	0	0	0	0	0	0	0	0	0	0	0	0	0	0	0	0	0	0	0	0	0	0	0	0	0	0	0	0	26347000	0	42958000	0	0	0	0	0	0	0	0	0
P63261	P63261	ACTG1	0	0	0	0	0	0	0	0	0	0	0	0	0	0	0	0	0	0	0	0	0	0	0	0	0	0	0	0	0	0	0	0	0	0	0	0	0	0	0	0	0	0	0	0	0	0	0
P63313	P63313	TMSB10	0	0	0	0	0	0	0	0	0	0	0	0	0	0	0	0	0	0	0	0	0	0	0	0	0	0	0	0	0	0	0	0	0	0	0	213950000	72461000	55054000	0	0	0	0	0	58641000	0	0	0
P63316	P63316	TNNC1	0	0	0	0	0	0	0	0	0	0	0	0	0	0	0	0	0	0	0	0	0	0	0	0	0	0	0	0	0	0	0	0	0	0	0	0	203950000	0	0	0	0	0	0	0	0	0	27867000
P67936	P67936	TPM4	0	0	0	0	0	0	0	0	0	37239000	0	0	0	0	0	0	0	64839000	0	0	0	0	0	0	34936000	0	0	14563000	39494000	0	0	0	0	151470000	0	0	24283000	17633000	0	0	0	23867000	0	67014000	0	0	0
P68133	P68133	ACTA1	336340000	145200000	217750000	270040000	274990000	184470000	197730000	297730000	168160000	101260000	187270000	164030000	194430000	194830000	205990000	266200000	147850000	177000000	202580000	194950000	193130000	156360000	232140000	269640000	150240000	246230000	183290000	229510000	201490000	207020000	224460000	320540000	259470000	1027200000	337910000	1096500000	338140000	843680000	452660000	727410000	918000000	595000000	324880000	399210000	558030000	318390000	710620000
P68871	P68871	HBB	33561000000	30831000000	59006000000	90530000000	169000000000	97217000000	17955000000	42735000000	55578000000	38189000000	36534000000	65998000000	42039000000	27209000000	36209000000	285000000000	52279000000	27474000000	163000000000	101000000000	34742000000	16425000000	64477000000	27233000000	232000000000	87846000000	91017000000	80736000000	191000000000	103000000000	116000000000	14035000000	20811000000	115000000000	21275000000	306000000000	39364000000	609000000000	32283000000	306000000000	61190000000	74674000000	254000000000	115000000000	104000000000	140000000000	64110000000
P69891	P69891	HBG1	0	99087000	27716000	0	401870000	0	0	0	31752000	22564000	0	0	43090000	0	0	1049300000	48487000	0	138360000	0	0	0	24304000	0	0	501950000	0	127160000	157450000	592150000	0	0	0	0	0	36398000	0	3089100000	0	0	0	31920000	142950000	0	0	0	21931000
P69892	P69892	HBG2	0	0	0	0	0	0	0	0	0	0	0	0	0	0	0	41164000	0	0	0	0	0	0	0	0	0	0	0	0	0	0	0	0	0	0	0	0	0	0	0	0	0	0	0	0	0	0	0
P69905	P69905	HBA1	18655000000	18213000000	29035000000	50963000000	88541000000	51733000000	10290000000	20678000000	26135000000	13184000000	16921000000	31779000000	21847000000	10834000000	20045000000	178000000000	31704000000	13252000000	79213000000	45586000000	18313000000	6072000000	28387000000	14762000000	83639000000	49503000000	51803000000	38238000000	96364000000	53257000000	59556000000	5571100000	11521000000	56462000000	10921000000	148000000000	26941000000	410000000000	19870000000	105000000000	28398000000	32453000000	158000000000	73460000000	48043000000	68152000000	34082000000
P78324	P78324	SIRPA	572710000	1666700000	668510000	609250000	650990000	354980000	832600000	651410000	608820000	279920000	905900000	634810000	696670000	443220000	840500000	949730000	587990000	678940000	272430000	775130000	520020000	844390000	749180000	1066500000	942060000	744310000	862560000	885200000	834970000	456690000	663760000	348970000	342850000	1395300000	403680000	949090000	1233200000	610780000	694280000	861350000	1058600000	366570000	328890000	717190000	444820000	1441400000	686880000
P80188	P80188	LCN2	6814100	6583200	6261300	7889300	8498300	7228400	6759000	9870800	12551000	13269000	10171000	11041000	0	0	0	6840500	0	6902100	8187200	11303000	0	13120000	0	0	17413000	12396000	45534000	10162000	7035900	6550800	10502000	297980000	10133000	171910000	140870000	984630000	239320000	0	52554000	164970000	118500000	81030000	298610000	336270000	80009000	16690000	148030000
P80404	P80404	ABAT	0	0	29951000	16329000	0	0	0	0	0	0	0	0	0	0	12165000	0	0	0	25436000	0	8321900	0	0	0	0	0	0	9840000	0	0	0	22537000	0	5148000	0	19548000	0	6036700	0	0	0	0	0	20114000	0	0	22867000
P80511	P80511	S100A12	0	389290000	255980000	136150000	314440000	0	131080000	180950000	85483000	212790000	272240000	74376000	170160000	162130000	219850000	0	0	0	240670000	263710000	89250000	108750000	0	164240000	115570000	0	125590000	0	0	152410000	0	133550000	0	516540000	220020000	0	390020000	315980000	121860000	410110000	324880000	40475000	0	169850000	209180000	107240000	194680000
P80723	P80723	BASP1	0	0	0	0	0	0	0	0	0	0	0	0	0	0	0	0	0	0	0	0	0	0	0	0	0	0	0	0	0	0	0	0	0	0	0	0	0	0	0	0	0	0	0	0	0	0	0
P80748	P80748		11910000000	26062000000	10530000000	8274000000	4843100000	4399300000	15600000000	15452000000	16464000000	29448000000	8185200000	19290000000	14074000000	3907900000	15627000000	9420500000	13654000000	9575600000	11024000000	23180000000	3629500000	8484200000	9034200000	13504000000	11272000000	9702000000	15948000000	12315000000	5673500000	5255600000	10551000000	12734000000	8861600000	30555000000	27262000000	16442000000	25779000000	13385000000	16013000000	19127000000	32553000000	8574400000	20014000000	13348000000	15654000000	4861100000	11481000000
P81172	P81172	HAMP	0	0	0	0	0	0	0	0	0	0	0	0	0	0	0	0	0	0	0	0	0	0	0	0	0	0	0	0	0	0	0	0	0	74891000	0	0	0	0	0	0	0	61296000	105010000	59281000	59136000	62554000	0
P81605	P81605	DCD	37440000	103690000	89307000	0	0	95631000	0	91845000	0	0	0	0	0	0	0	0	42307000	0	0	55909000	0	0	0	0	0	0	39047000	0	0	0	42505000	182900000	102630000	156740000	89623000	75833000	671360000	0	98830000	84557000	89584000	80157000	92681000	106470000	0	0	0
P84243	P84243	H3F3A	151850000	253280000	203710000	286630000	216800000	90898000	372350000	0	0	0	0	137460000	442580000	287200000	240800000	173840000	0	0	0	0	0	0	0	137650000	298330000	262100000	0	290100000	0	0	0	0	0	0	0	0	128380000	0	0	0	39056000	0	0	82410000	168740000	204680000	0
P98160	P98160	HSPG2	572220000	447580000	249020000	101240000	98626000	150000000	379930000	461490000	330240000	369790000	404950000	468670000	405220000	244340000	328580000	308560000	172800000	303630000	284250000	686710000	298310000	254830000	608420000	457240000	677200000	425380000	424390000	348250000	359830000	220680000	421010000	1173300000	516720000	456590000	413110000	1620300000	487150000	974230000	105290000	544810000	982570000	460510000	671440000	132310000	408970000	319200000	361120000
P98172	P98172	EFNB1	0	0	0	0	0	0	0	0	0	0	0	0	0	0	0	0	0	0	0	0	0	0	0	0	0	0	0	0	0	0	0	56931000	0	0	0	0	0	0	0	0	0	0	0	0	0	0	0
P99999	P99999	CYCS	0	0	0	0	0	0	0	0	0	0	0	0	0	0	0	0	0	0	0	0	0	0	0	0	0	0	0	0	0	0	0	0	0	0	0	0	0	0	0	0	0	0	0	0	0	0	0
Q00266	Q00266	MAT1A	0	17602000	0	0	0	0	0	0	5273400	0	0	0	0	0	0	0	0	0	0	0	0	0	0	0	0	4746300	0	0	0	0	5204400	8304700	0	0	0	0	0	0	0	0	0	0	0	0	0	0	0
Q00796	Q00796	SORD	0	0	0	0	0	0	0	0	0	0	0	0	0	0	0	845240000	56118000	17529000	629780000	0	0	0	35080000	0	25564000	27941000	0	56491000	18659000	250170000	0	0	0	65075000	70046000	21915000	0	27091000	0	0	65296000	0	0	191320000	79506000	31577000	64770000
Q01459	Q01459	CTBS	143090000	131410000	179030000	199920000	135620000	103910000	89604000	331360000	168810000	113490000	83215000	104610000	93902000	173820000	83530000	114630000	78405000	102340000	84659000	115890000	99357000	144860000	77618000	144160000	112930000	130260000	116490000	120830000	85319000	83331000	146320000	220580000	119880000	140960000	218960000	174950000	108350000	163620000	0	223210000	94301000	123940000	265040000	146200000	78224000	100460000	101310000
Q01469	Q01469	FABP5	0	0	0	0	0	0	0	0	0	0	0	0	0	0	0	0	0	0	0	0	0	0	0	0	0	0	0	0	0	0	0	0	0	0	0	0	0	0	0	0	0	0	0	0	0	0	0
Q01518	Q01518	CAP1	0	0	0	0	0	0	0	0	0	0	0	0	0	0	0	0	0	0	0	0	0	0	0	0	0	0	0	0	0	0	0	0	0	0	0	0	0	0	0	97553000	0	0	0	0	0	0	0
Q01581	Q01581	HMGCS1	0	0	0	0	0	0	0	0	0	0	0	0	0	0	0	0	0	0	0	0	0	0	0	0	0	0	0	0	0	0	0	0	0	0	0	0	0	0	0	0	0	0	0	0	0	0	0
Q01638	Q01638	IL1RL1	0	0	0	0	0	0	0	0	0	0	0	0	0	0	0	0	0	0	0	0	0	0	0	0	0	0	0	367860000	0	0	0	0	0	0	0	411580000	0	0	0	0	0	0	78910000	154320000	0	0	150840000
Q01995	Q01995	TAGLN	17901000	22894000	26755000	21548000	19752000	22537000	18766000	20194000	25287000	32811000	16773000	0	17936000	0	20946000	0	0	18554000	21840000	0	0	23283000	0	0	35289000	0	0	0	25730000	17991000	0	0	0	0	0	0	0	0	0	0	0	0	0	59485000	0	0	0
Q02224	Q02224	CENPE	0	0	0	0	0	0	0	0	0	0	0	0	28538000	0	0	0	0	0	80753000	0	0	0	0	0	0	0	46645000	0	0	0	0	0	0	0	0	0	0	0	0	0	0	0	0	0	0	0	0
Q02487	Q02487	DSC2	0	0	0	0	0	0	0	62903000	0	0	0	0	0	43263000	0	135490000	0	0	0	0	28149000	0	95475000	39043000	0	175710000	0	0	0	0	0	0	0	0	0	184920000	0	0	62072000	0	0	0	69134000	0	0	55218000	0
Q02747	Q02747	GUCA2A	0	0	0	0	0	0	104770000	27726000	0	0	0	0	0	0	0	0	0	0	0	0	0	0	0	0	0	0	0	0	0	0	0	0	0	0	0	0	0	0	0	0	0	0	0	0	178380000	0	0
Q02818	Q02818	NUCB1	0	0	0	0	0	0	0	0	0	0	0	0	0	0	0	0	0	98939000	0	0	594050000	639820000	0	0	0	0	1336000000	0	44546000	0	732650000	115980000	1313600000	541810000	917830000	1421100000	109370000	2022700000	2252000000	1091900000	1290900000	1060600000	585880000	322210000	1370300000	1052300000	530820000
Q02985	Q02985	CFHR3	445810000	577530000	456410000	756250000	716540000	0	484340000	2345200000	405120000	432360000	621170000	816380000	276070000	559340000	0	921340000	417790000	334080000	501100000	519770000	541400000	511650000	707960000	784240000	617690000	761530000	823880000	805860000	396830000	461940000	749190000	604410000	3421600000	585940000	2136500000	0	3884100000	1185100000	1297500000	1398700000	1552000000	3550300000	1125500000	894970000	712420000	304720000	309850000
Q03154	Q03154	ACY1	0	0	0	0	0	0	0	0	0	0	0	0	0	0	0	0	0	0	0	0	0	0	0	0	0	0	0	0	0	0	0	50016000	0	0	0	30886000	0	0	0	21973000	0	0	0	0	0	0	581810000
Q03591	Q03591	CFHR1	1228900000	1675700000	1043100000	2004800000	902040000	1723300000	588310000	2568300000	1410500000	1929000000	1681200000	1499100000	905080000	1125800000	840660000	1144600000	1356200000	830690000	1085800000	903150000	868990000	830070000	1223900000	905210000	1426100000	571120000	758120000	1204000000	1137100000	1277500000	815750000	1745200000	3361600000	1411000000	5180400000	587250000	3273500000	2181500000	2861500000	3973600000	2369600000	2585200000	2695400000	1909900000	1368200000	2531100000	631050000
Q04446	Q04446	GBE1	0	0	0	0	0	0	0	0	0	0	0	0	0	0	0	0	0	0	0	0	0	16437000	0	0	0	0	0	0	0	0	0	0	0	0	0	0	0	0	0	0	0	0	0	0	0	0	14402000
Q04756	Q04756	HGFAC	2281700000	1819800000	2416700000	1468300000	1842500000	1115200000	1851600000	1668700000	2154100000	1905200000	1970900000	2006700000	2622300000	1955200000	1989000000	2657100000	2230700000	2656500000	3208400000	2497800000	2950700000	1861800000	2161300000	1773700000	1810300000	2350500000	1609100000	1842100000	2270600000	2600900000	2768700000	1601000000	1032400000	1190000000	1884900000	1473100000	1522200000	1665800000	1379100000	1719000000	1128400000	1214800000	1529800000	1302500000	2081100000	1211100000	1850300000
Q04760	Q04760	GLO1	0	0	0	0	0	0	0	0	0	0	0	0	0	0	0	0	0	0	0	0	0	0	0	0	0	0	0	0	0	0	0	0	0	0	0	0	0	57578000	0	0	0	0	0	0	0	0	0
Q04917	Q04917	YWHAH	0	59705000	0	0	0	0	0	0	0	0	0	23479000	0	0	0	0	0	0	0	0	0	0	0	0	0	0	0	0	0	0	0	0	0	0	0	80881000	0	0	0	0	0	0	0	0	29568000	0	0
Q06033	Q06033	ITIH3	11597000000	14368000000	14530000000	14400000000	15507000000	16559000000	14313000000	19215000000	13285000000	15787000000	14199000000	17011000000	15661000000	17221000000	14691000000	25957000000	13659000000	12033000000	8819900000	11278000000	30542000000	18720000000	16502000000	28077000000	13448000000	17071000000	14780000000	19670000000	13001000000	21531000000	16840000000	24641000000	24126000000	37041000000	36969000000	27375000000	36378000000	35295000000	40404000000	23815000000	40085000000	30647000000	35023000000	20926000000	26688000000	19510000000	22888000000
Q06141	Q06141	REG3A	58937000	381270000	202710000	185560000	38067000	118110000	465570000	186600000	308550000	308680000	215520000	214270000	223500000	56713000	333510000	65272000	150850000	226820000	111640000	547930000	0	112930000	0	397470000	141800000	258470000	392650000	245590000	94533000	158080000	81930000	408230000	92971000	2737600000	128070000	762210000	661510000	131290000	134570000	360640000	771080000	274500000	133090000	321900000	219460000	0	151090000
Q06278	Q06278	AOX1	5585900	0	0	0	0	0	8966500	0	0	4583200	0	0	5212600	0	5945000	0	1827400	5810000	0	0	0	7297200	9807700	7899400	0	7140100	0	0	0	0	6821000	6497600	0	12752000	0	9277400	9409700	3016700	0	0	2886300	0	0	0	4043200	0	5386700
Q06323	Q06323	PSME1	0	0	0	0	0	0	0	0	0	0	0	0	0	0	0	0	0	0	0	0	0	0	0	0	0	0	0	0	0	0	0	0	0	0	0	0	0	0	0	0	101970000	0	0	0	0	0	0
Q06520	Q06520	SULT2A1	0	0	0	0	0	0	0	0	0	0	0	0	0	0	0	0	0	0	0	0	0	0	0	0	0	0	0	0	0	0	0	0	0	0	0	0	0	0	0	0	0	0	0	0	0	0	0
Q06830	Q06830	PRDX1	0	0	0	0	0	0	0	0	0	0	0	0	0	0	0	0	0	0	0	0	0	0	0	0	0	0	0	0	0	0	0	0	0	0	0	66031000	0	157830000	0	47874000	0	0	0	0	0	66285000	0
Q07507	Q07507	DPT	0	0	0	0	0	0	20014000	0	23034000	22442000	22750000	0	0	0	0	0	0	0	0	0	0	0	0	0	0	0	0	0	0	26228000	0	0	0	0	0	0	0	0	0	0	0	0	0	0	0	0	0
Q07954	Q07954	LRP1	60467000	51069000	0	39274000	0	0	0	0	38847000	0	0	0	32108000	42308000	45336000	61548000	89627000	33602000	0	33704000	0	0	40389000	67662000	0	0	0	0	0	0	0	0	0	97649000	0	107730000	0	0	0	0	47349000	0	0	42305000	0	46953000	0
Q08380	Q08380	LGALS3BP	3712800000	2793000000	3665400000	4863600000	3255600000	4130800000	5773100000	1304100000	3875400000	5486200000	4223700000	3328300000	4692600000	5200500000	4318300000	4266000000	5700300000	3308700000	3683500000	4920800000	4231100000	5334300000	5407800000	2703300000	2279900000	5133800000	2588300000	2799400000	2356700000	2888100000	2752800000	2171200000	2495000000	4062700000	4979000000	18690000000	3014800000	4692000000	6168500000	2163200000	2061700000	3969200000	2225600000	2838200000	1878700000	7193400000	2873700000
Q08554	Q08554	DSC1	0	0	0	0	0	0	0	0	0	0	0	0	0	0	0	0	0	0	0	0	0	0	0	0	0	0	0	0	0	0	0	0	0	0	0	0	79630000	0	0	0	0	0	0	0	0	0	0
Q08830	Q08830	FGL1	0	0	0	48200000	0	0	0	0	54157000	0	0	0	103800000	0	0	0	17236000	41700000	0	0	17322000	0	55052000	42319000	54288000	0	0	94752000	0	32129000	0	0	234360000	149830000	129100000	99832000	247840000	60648000	0	0	61339000	190560000	0	96510000	170740000	148320000	59746000
Q08ET2	Q08ET2	SIGLEC14	0	0	0	0	0	0	0	0	0	0	0	0	0	0	0	17165000	0	0	0	0	0	0	0	13712000	0	0	0	0	0	0	0	0	0	0	0	0	0	0	0	0	0	0	0	0	32451000	0	0
Q10588	Q10588	BST1	80430000	64118000	77788000	116270000	74150000	165930000	124610000	0	49409000	96818000	120330000	57096000	110310000	98904000	0	65919000	61936000	0	88282000	0	0	50473000	87390000	0	68758000	193420000	44566000	0	0	79127000	0	0	0	0	58687000	192630000	0	47817000	80440000	0	128330000	0	0	83670000	160160000	64434000	109910000
Q12805	Q12805	EFEMP1	1724000000	2020800000	1775500000	1526400000	2056500000	1973900000	2491300000	3203600000	1627600000	1804300000	2094200000	2451400000	1872300000	2704200000	2306600000	3198400000	1930500000	2214600000	1944800000	1580000000	2962500000	1808900000	1879600000	3815300000	2277700000	1684100000	2615500000	2272200000	1997300000	2023200000	1781100000	5089600000	2677600000	4411700000	4971900000	8358400000	3002400000	3332800000	2683500000	2865800000	5695500000	3382000000	2808800000	1415400000	2980200000	2239100000	2747500000
Q12841	Q12841	FSTL1	0	0	0	0	0	0	0	0	0	0	0	0	0	0	0	0	0	0	0	0	0	0	35677000	31627000	0	0	0	0	0	0	0	0	49521000	58566000	63025000	136940000	65749000	76432000	69506000	59276000	86307000	0	69043000	41771000	41269000	33050000	71175000
Q12860	Q12860	CNTN1	102980000	295020000	100070000	177060000	255900000	149100000	91841000	85054000	130240000	116270000	97947000	151670000	182680000	228810000	100270000	227470000	34731000	60761000	186180000	96800000	293400000	46023000	0	0	490160000	162650000	115630000	277440000	172360000	141390000	234500000	0	0	287260000	256350000	391050000	105140000	275490000	0	193580000	0	92784000	292590000	103760000	155980000	319300000	226620000
Q12866	Q12866	MERTK	0	0	0	0	0	0	0	0	0	0	0	0	0	17723000	0	0	0	0	0	0	0	0	0	0	0	0	0	0	0	0	0	0	0	0	0	100810000	0	0	0	0	0	0	0	0	0	0	20851000
Q12882	Q12882	DPYD	0	0	0	0	0	0	0	0	0	0	0	0	0	0	0	0	0	0	0	0	0	0	0	0	0	0	0	0	0	0	0	0	0	0	0	0	0	0	0	0	0	0	0	0	0	0	0
Q12884	Q12884	FAP	27834000	0	0	23273000	0	26504000	19845000	0	0	0	0	0	0	27121000	34029000	31269000	0	0	0	0	23960000	23406000	25893000	0	0	0	0	0	0	0	0	43750000	0	0	0	0	0	0	0	0	0	0	0	0	0	0	0
Q12907	Q12907	LMAN2	82682000	85579000	0	83325000	0	0	119770000	50966000	0	0	0	0	0	0	45304000	0	0	0	51100000	0	0	50902000	0	0	0	0	0	0	0	0	0	145200000	0	82786000	78906000	0	96639000	0	0	0	0	0	0	147450000	0	0	0
Q12913	Q12913	PTPRJ	121260000	88511000	88512000	104420000	114450000	91078000	94381000	77514000	69341000	106200000	72373000	92870000	90183000	72465000	74086000	0	91614000	72083000	56081000	100190000	100380000	97043000	71165000	83271000	114550000	142390000	92270000	114930000	112130000	83190000	106960000	129760000	73896000	109680000	88012000	149640000	64770000	75545000	147030000	113320000	146780000	124410000	77012000	68089000	109370000	79326000	112280000
Q13011	Q13011	ECH1	0	0	0	0	0	0	0	0	0	0	0	0	0	0	0	0	0	0	0	0	0	0	0	0	0	0	0	0	0	0	0	0	0	0	0	0	97560000	0	0	0	0	0	0	112590000	0	0	0
Q13103	Q13103	SPP2	487960000	323780000	496250000	321430000	788470000	382990000	475710000	291280000	521160000	472970000	546790000	447560000	216100000	497540000	436020000	456890000	1033400000	380330000	556470000	260350000	741370000	669400000	449200000	582110000	517200000	783850000	281650000	266300000	545190000	956700000	505910000	186990000	0	0	0	0	0	0	0	123230000	92253000	59612000	0	201070000	65756000	139780000	32635000
Q13201	Q13201	MMRN1	141450000	274100000	109930000	151720000	162350000	167610000	229290000	144110000	233940000	190000000	219190000	178010000	183880000	122950000	174260000	179070000	117890000	129970000	207650000	277830000	138650000	146440000	241720000	187210000	176700000	241630000	157750000	136990000	124880000	114110000	263420000	124110000	146120000	396560000	237640000	666520000	282170000	300070000	88356000	349860000	379180000	134500000	234090000	176140000	226030000	328330000	145030000
Q13228	Q13228	SELENBP1	137350000	19179000	8291600	0	74062000	0	0	0	0	0	40590000	8866700	28811000	0	0	8877600	0	0	0	0	0	127410000	22245000	174500000	0	21831000	72439000	0	0	0	0	31546000	67862000	14282000	10076000	83679000	0	324390000	13062000	12901000	76572000	21278000	91408000	98831000	44960000	50367000	188520000
Q13508	Q13508	ART3	0	0	0	0	0	19893000	0	71236000	0	0	0	0	0	0	0	0	0	0	0	0	0	0	0	0	0	0	50836000	43217000	0	0	0	0	0	69015000	37909000	58793000	0	0	0	0	55840000	60269000	34103000	0	33140000	0	0
Q13510	Q13510	ASAH1	0	0	0	0	0	0	0	0	0	0	0	0	0	0	0	0	0	0	0	0	0	0	0	0	0	0	0	0	0	0	0	0	73439000	0	84854000	72814000	0	0	84115000	0	0	0	0	0	0	0	61529000
Q13642	Q13642	FHL1	0	0	0	0	0	0	0	0	0	0	0	0	0	0	0	0	0	0	0	0	0	0	0	0	0	0	0	0	0	0	0	0	0	0	0	0	0	0	0	0	0	0	0	64776000	0	0	0
Q13740	Q13740	ALCAM	0	0	70018000	0	0	0	57620000	98833000	60484000	54662000	64727000	71959000	81685000	41287000	0	0	71044000	61667000	0	65415000	30292000	0	44252000	0	37148000	56922000	152710000	0	0	43831000	0	60927000	0	0	82511000	102420000	99931000	40779000	0	0	0	0	0	88294000	68540000	33100000	72157000
Q13790	Q13790	APOF	1530800000	975240000	1930000000	1431900000	1395600000	1215400000	1369500000	1572700000	2484100000	2085700000	3492100000	1419200000	1722000000	2133600000	854100000	2216500000	1168300000	3303000000	1352900000	3329200000	2807500000	1732600000	1618500000	1178200000	2361700000	1662500000	1481600000	2862000000	1608500000	1666600000	979650000	2356900000	3401700000	2495200000	3932800000	582690000	3230900000	3254200000	2877900000	2480400000	2631300000	2581200000	1924200000	1464200000	1548200000	2658700000	1509400000
Q13867	Q13867	BLMH	0	0	0	0	0	0	0	0	0	0	0	0	0	0	0	0	0	0	0	0	0	0	0	0	0	0	0	0	0	0	0	0	0	0	0	0	0	0	0	0	0	0	0	0	0	0	0
Q14019	Q14019	COTL1	0	0	0	0	0	0	0	0	0	0	0	58767000	0	0	0	0	0	0	0	0	0	0	0	0	0	0	0	0	0	0	0	0	0	0	0	0	0	0	0	0	0	0	0	0	0	0	0
Q14117	Q14117	DPYS	0	0	0	0	0	0	0	0	0	0	0	0	0	0	0	0	0	0	0	0	0	0	0	0	0	0	0	0	0	0	0	0	0	0	0	0	0	52259000	0	0	0	0	0	0	0	0	0
Q14118	Q14118	DAG1	51123000	0	0	0	0	105710000	80845000	273690000	82126000	89587000	0	0	0	79294000	0	0	0	0	0	70516000	91680000	0	0	104240000	0	0	77968000	127320000	0	0	87487000	277310000	91502000	242170000	146720000	254920000	179920000	0	0	0	246400000	132440000	52386000	0	95496000	0	58444000
Q14126	Q14126	DSG2	35424000	51501000	40867000	76402000	26767000	0	56864000	0	0	0	46161000	0	0	50145000	43610000	31527000	59721000	35556000	38587000	0	67468000	43912000	58953000	61154000	23530000	44622000	0	71430000	25120000	41526000	39076000	25801000	0	49589000	50336000	194700000	0	0	57855000	26678000	0	39587000	0	0	42058000	51549000	54201000
Q14315	Q14315	FLNC	0	0	0	0	0	0	0	0	0	0	0	0	0	0	0	0	0	0	0	0	0	0	0	0	0	0	0	0	0	0	0	0	0	0	0	0	0	0	0	0	0	0	0	0	0	0	0
Q14508	Q14508	WFDC2	0	0	0	0	0	0	0	0	0	0	0	0	0	0	0	0	0	0	0	0	0	0	0	0	0	0	0	0	0	0	0	0	0	126340000	0	0	66322000	0	0	0	0	0	0	0	0	0	0
Q14515	Q14515	SPARCL1	126490000	34873000	48430000	78204000	56868000	157960000	70004000	86101000	65892000	0	128090000	131010000	87144000	122300000	96499000	353110000	54761000	96634000	73285000	83287000	182830000	38808000	132890000	181230000	140680000	269020000	70098000	140870000	123790000	76430000	84333000	1219000000	164120000	471180000	264460000	699000000	78997000	191980000	0	124180000	343390000	729370000	301580000	578200000	25155000	0	150150000
Q14520	Q14520	HABP2	10551000000	9948500000	8848700000	9451600000	8822200000	10343000000	9427500000	8970300000	7378600000	8603800000	10172000000	6403500000	9525500000	10230000000	10017000000	8890700000	9466800000	8172800000	9579800000	10971000000	11245000000	10291000000	9842000000	9712700000	10966000000	11724000000	9792600000	11207000000	7718800000	8458900000	9354900000	6918700000	7499800000	11160000000	9278700000	3316100000	6340500000	10035000000	8922200000	8396000000	8824900000	7369700000	8348000000	6580300000	7042400000	12834000000	7277000000
Q14624	Q14624	ITIH4	94362000000	108000000000	107000000000	96684000000	119000000000	98048000000	107000000000	110000000000	97222000000	130000000000	112000000000	78784000000	100000000000	98042000000	92325000000	102000000000	105000000000	94671000000	98784000000	89431000000	122000000000	102000000000	124000000000	109000000000	112000000000	78652000000	83525000000	90993000000	86844000000	123000000000	114000000000	77525000000	113000000000	113000000000	111000000000	61946000000	158000000000	108000000000	118000000000	97011000000	115000000000	92630000000	132000000000	101000000000	99154000000	94499000000	103000000000
Q14697	Q14697	GANAB	505300000	0	54658000	76164000	0	0	44744000	0	0	0	0	0	0	0	63592000	0	0	0	0	0	51027000	0	80526000	72702000	0	0	0	0	0	0	0	0	0	0	0	66297000	0	0	0	0	81627000	36221000	0	0	16228000	45604000	0
Q14749	Q14749	GNMT	0	0	0	0	0	0	41669000	0	0	0	0	0	0	0	0	0	0	0	32105000	0	0	25320000	0	0	23877000	0	0	0	0	0	0	0	0	53726000	0	0	0	0	0	0	0	0	0	0	28929000	0	0
Q14766	Q14766	LTBP1	15654000	30332000	0	21313000	0	61728000	0	0	16483000	0	0	0	27205000	0	0	0	0	29434000	0	0	79970000	0	25448000	41989000	57250000	18397000	53971000	29412000	17980000	25397000	36840000	0	0	0	0	0	0	0	0	0	0	0	0	60565000	13585000	0	0
Q14914	Q14914	PTGR1	0	0	0	0	0	0	0	0	0	0	0	0	0	0	0	0	0	0	0	0	0	0	0	0	0	0	0	0	0	0	0	0	0	0	0	0	0	0	0	0	0	0	0	0	0	0	0
Q14956	Q14956	GPNMB	0	0	0	0	0	0	0	0	104070000	0	0	0	0	0	0	0	0	0	0	0	0	0	0	0	0	0	0	0	0	0	0	0	0	0	0	0	0	0	0	0	0	0	0	0	0	0	0
Q15063	Q15063	POSTN	0	46911000	30795000	52836000	63490000	112660000	54362000	104710000	60182000	57293000	67166000	71641000	68147000	83495000	0	155200000	0	131300000	35597000	46989000	95895000	0	52591000	0	83628000	37557000	0	63189000	43840000	0	0	163980000	169820000	67817000	112040000	147380000	0	157290000	89879000	133300000	288990000	306080000	0	65164000	77268000	54696000	88231000
Q15084	Q15084	PDIA6	0	0	0	0	0	0	0	0	0	0	0	0	0	0	0	0	0	0	0	0	0	0	0	0	0	0	0	0	0	0	0	0	0	0	0	0	0	0	0	0	0	0	0	0	0	0	0
Q15113	Q15113	PCOLCE	0	0	0	0	0	0	0	0	0	0	0	0	0	32745000	0	0	0	0	0	0	0	0	0	36918000	0	0	0	0	0	22909000	0	83182000	0	0	0	0	0	44613000	0	0	42921000	0	0	0	0	37799000	32655000
Q15166	Q15166	PON3	155290000	193620000	288370000	222260000	220390000	173300000	459650000	181710000	273110000	335970000	143150000	203290000	185210000	155260000	216240000	168810000	158520000	180180000	183160000	210050000	282110000	80885000	98492000	214140000	120550000	107660000	0	287480000	118320000	304310000	174990000	0	167100000	0	145150000	0	268330000	223710000	0	188580000	118210000	103270000	208530000	279150000	147600000	232890000	201640000
Q15274	Q15274	QPRT	0	0	0	0	0	0	0	0	0	0	0	0	0	0	0	0	0	0	0	0	0	0	0	0	0	0	0	0	0	0	0	0	0	0	0	0	0	0	0	0	0	0	0	0	0	0	0
Q15436	Q15436	SEC23A	0	0	0	0	0	0	0	0	0	0	0	0	0	0	129140000	0	0	0	0	0	0	0	0	0	0	0	0	0	0	0	0	0	0	0	0	55819000	0	0	0	0	0	0	0	0	0	0	0
Q15485	Q15485	FCN2	100610000	159750000	189400000	102140000	171020000	161140000	229230000	85754000	206680000	469460000	49894000	0	298980000	67761000	130580000	76193000	187140000	209450000	312870000	305170000	136660000	82654000	126120000	75570000	249810000	468290000	281720000	69785000	266270000	165560000	123980000	297020000	141100000	0	134770000	0	439350000	0	365380000	199990000	101080000	671570000	231760000	385890000	100950000	110590000	118430000
Q15582	Q15582	TGFBI	1522000000	1277700000	898330000	1621700000	1366900000	1181000000	987810000	613160000	1157100000	1176100000	1336200000	999120000	1305700000	1286100000	1252000000	911960000	1063300000	1134900000	1418800000	918090000	1377600000	775060000	1017500000	1163900000	1415200000	1372700000	1072000000	917110000	1547300000	1162800000	1161000000	71345000	707680000	2900000000	1441900000	1491600000	1244400000	1350100000	1245100000	1257500000	1968800000	996050000	1357000000	1261800000	1113700000	1561100000	1311600000
Q15828	Q15828	CST6	0	0	0	0	0	52722000	0	90195000	0	0	0	30587000	0	0	0	0	0	0	0	0	0	0	0	0	0	0	0	0	0	0	0	412120000	0	0	0	0	111290000	0	0	0	0	0	0	0	0	0	0
Q15848	Q15848	ADIPOQ	539030000	1426100000	1804800000	443770000	1670600000	518650000	825810000	809500000	573930000	931440000	704180000	1644600000	298280000	781280000	672780000	455130000	724310000	562810000	527180000	1075200000	2736300000	1658800000	1194600000	640300000	1871700000	424760000	314080000	1055000000	316180000	755240000	736160000	1530600000	618510000	2441300000	1407700000	4080300000	2572700000	3309900000	626010000	1485600000	2196000000	783530000	802330000	408220000	418130000	551460000	540580000
Q15904	Q15904	ATP6AP1	0	0	0	0	0	0	0	0	0	0	0	0	0	0	0	0	0	0	0	0	0	0	0	0	0	0	0	0	0	0	0	0	0	0	0	0	0	0	0	0	0	0	0	0	0	0	12376000
Q16270	Q16270	IGFBP7	0	0	0	13499000	0	16037000	0	30162000	0	0	0	0	0	0	0	27551000	0	12050000	0	0	15500000	0	0	0	0	0	0	0	0	0	0	85946000	21816000	76674000	57528000	76968000	53437000	51193000	0	0	33908000	27565000	39948000	0	19502000	0	29240000
Q16610	Q16610	ECM1	1857300000	1319000000	1823100000	1132400000	1791200000	2073100000	1613200000	1734000000	1579100000	2131400000	1985900000	1681900000	2062500000	2029000000	2635900000	1616500000	1807800000	1700800000	1587700000	1560200000	1505600000	2295700000	1826300000	2250100000	1888700000	2652500000	1396900000	1705800000	1747800000	1903000000	1592800000	2077700000	1700300000	1039000000	1779500000	4192500000	1604000000	1898700000	3167400000	1942800000	1716700000	2960400000	1652600000	1816000000	2101400000	1530900000	2086800000
Q16658	Q16658	FSCN1	0	0	0	0	0	0	0	0	0	0	0	0	0	0	0	0	0	0	0	0	0	0	0	0	0	0	0	0	0	0	0	0	0	0	0	0	0	0	0	0	0	0	0	0	0	0	0
Q16706	Q16706	MAN2A1	82823000	47913000	45746000	48418000	38410000	27420000	54115000	0	25434000	73045000	50616000	32728000	49345000	38048000	72445000	55051000	31182000	44876000	54072000	49848000	39651000	62388000	29600000	39500000	0	72617000	0	56021000	32342000	0	40331000	0	44026000	89578000	72576000	0	59268000	81903000	79905000	55306000	0	60167000	0	0	43893000	212200000	35313000
Q16762	Q16762	TST	0	0	0	0	0	0	0	0	0	0	0	61510000	0	0	0	0	0	0	0	0	0	0	0	0	0	0	0	0	0	0	0	0	0	0	0	0	0	0	0	0	0	0	0	0	0	0	0
Q16822	Q16822	PCK2	29109000	75755000	49361000	69317000	76104000	44280000	36497000	103840000	72937000	78464000	46389000	0	32863000	44600000	51619000	69519000	77121000	68800000	90809000	60444000	59272000	94560000	76552000	48962000	40002000	0	0	0	54793000	53923000	0	0	0	759780000	0	0	0	0	0	0	0	0	0	0	0	0	96482000
Q16836	Q16836	HADH	0	0	0	0	0	0	0	0	0	0	0	0	0	0	0	0	0	0	0	0	0	0	0	0	0	0	0	0	0	0	0	0	0	0	0	0	0	0	0	0	0	0	0	0	0	0	0
Q16851	Q16851	UGP2	172040000	475750000	116350000	0	159640000	0	160730000	77029000	83158000	0	0	78623000	65381000	21731000	62944000	0	85516000	208420000	12105000	0	0	208480000	98543000	0	47059000	0	0	71842000	83087000	111690000	0	0	0	37728000	16862000	0	119790000	75942000	15202000	0	0	9427100	61439000	170770000	284440000	0	141970000
Q16853	Q16853	AOC3	112060000	0	116530000	110280000	85494000	179340000	98233000	99840000	132970000	86559000	175750000	140490000	147960000	142010000	91488000	181390000	76709000	162290000	88501000	192890000	131630000	138640000	76469000	95570000	72606000	91744000	0	92183000	138250000	245200000	82688000	134970000	41893000	0	0	135330000	0	163960000	0	81351000	170100000	66040000	76607000	120970000	64823000	79014000	168350000
Q3LXA3	Q3LXA3	DAK	0	9362100	0	30373000	0	13541000	0	0	0	0	7629200	0	0	0	0	0	0	0	7292800	7281800	8520400	0	0	0	2960000	0	7624200	0	0	0	0	12994000	0	0	0	0	0	5483800	0	15847000	11427000	0	18784000	6819300	9945900	0	66117000
Q3MIT2	Q3MIT2	PUS10	40411000	0	0	53101000	0	0	130310000	0	0	0	0	0	0	0	61066000	0	0	0	0	77080000	0	0	0	50758000	0	0	0	0	0	0	91300000	0	0	0	0	0	0	0	0	0	0	0	0	0	0	0	0
Q4G0P3	Q4G0P3	HYDIN	2744900000	9828900000	4949000000	1349200000	6499700000	2978800000	2492200000	1157500000	5156500000	5331000000	5442200000	3205500000	3800600000	3013200000	2663600000	5081100000	7490600000	5145700000	0	3070200000	5308700000	5125200000	5361600000	4466600000	4708200000	4852200000	3346000000	9151800000	3749500000	4282500000	3015600000	2031600000	5228500000	2396800000	4776200000	2313500000	7483800000	3072700000	7170400000	5069100000	4615000000	5266000000	3040900000	1427600000	3858400000	7123300000	4654000000
Q4LDE5	Q4LDE5	SVEP1	0	0	0	0	0	0	0	0	0	0	0	0	0	0	0	0	0	0	0	0	0	0	0	0	0	0	0	0	0	0	0	27774000	0	0	0	31397000	0	0	0	0	0	0	0	0	0	0	0
Q53GG5	Q53GG5	PDLIM3	0	0	0	0	0	0	0	0	0	162040000	0	0	0	0	0	5751900000	0	0	0	0	0	0	0	0	0	0	0	0	0	0	0	151710000	0	222460000	0	0	319110000	0	140760000	313250000	0	0	0	0	0	0	0
Q562E7	Q562E7	WDR81	0	0	0	0	0	0	0	0	0	0	0	0	0	0	0	0	414030000	0	0	0	443640000	0	0	355640000	0	0	0	0	0	0	0	202200000	0	0	0	0	0	0	0	0	0	0	0	0	0	0	0
Q562R1	Q562R1	ACTBL2	510540000	594290000	70016000	60635000	42057000	0	81949000	0	0	0	59389000	0	0	0	0	223360000	73368000	0	0	0	0	0	702430000	0	774800000	260170000	0	298920000	0	0	53384000	0	215050000	0	0	0	0	0	0	0	0	0	0	43255000	519100000	0	0
Q5R3I4	Q5R3I4	TTC38	0	0	0	0	0	0	0	0	0	0	0	0	0	0	0	0	0	0	0	0	0	0	0	0	0	0	0	0	0	0	0	0	0	0	0	0	0	0	0	0	0	0	0	0	0	0	0
Q5VU43	Q5VU43	PDE4DIP	1686800000	1710600000	1284600000	1917300000	2000600000	1403200000	2191500000	3898000000	2188300000	3283800000	4015000000	5133100000	1916400000	1738900000	2775800000	2165400000	1426100000	1929100000	1571700000	1536300000	1671000000	3264700000	1266000000	2937300000	1342900000	2365200000	1988900000	1667800000	1612500000	2735900000	1972800000	1921700000	5666400000	1979300000	7036000000	1218100000	9130600000	8570500000	4706300000	6130900000	2009700000	3231900000	9509300000	4550500000	3901600000	5325700000	2485000000
Q6EMK4	Q6EMK4	VASN	1552100000	1905400000	1492500000	1414900000	1473000000	1360400000	1608000000	1699200000	2017900000	881440000	1541300000	1273900000	1923500000	1352900000	1458700000	1689200000	1033300000	1415500000	962700000	1232900000	2160700000	667780000	896480000	1450100000	1586900000	1611500000	1322800000	1520700000	1161000000	1382400000	1633700000	2906900000	1052900000	1987900000	1711900000	4787300000	1442600000	1775800000	1476500000	1915800000	2209800000	2025300000	1714900000	1364100000	1341400000	506070000	1571500000
Q6GPI1	Q6GPI1	CTRB2	0	0	0	0	0	0	0	0	0	0	0	0	0	0	0	0	0	0	0	0	0	0	0	0	0	0	0	0	0	0	0	0	0	183070000	0	0	0	0	0	0	0	0	0	0	0	18093000	0
Q6P179	Q6P179	ERAP2	0	0	0	0	0	0	0	0	0	0	0	0	0	0	0	0	0	0	0	0	0	0	0	0	0	0	0	0	0	0	0	0	0	0	0	0	0	0	0	0	0	0	0	0	0	0	0
Q6UWP8	Q6UWP8	SBSN	0	17182000	17351000	33744000	0	34103000	13718000	40567000	0	224770000	32009000	0	0	128800000	21320000	216540000	21848000	55278000	0	59010000	85703000	20500000	173290000	90913000	0	28397000	51266000	92686000	48427000	18336000	36816000	1496100000	105820000	556700000	155740000	233630000	141250000	52412000	88143000	52400000	143880000	244680000	91734000	30163000	17340000	36420000	173020000
Q6UX06	Q6UX06	OLFM4	0	0	0	0	0	0	0	0	0	0	0	50143000	0	0	0	0	0	0	0	0	0	0	0	0	0	0	0	0	0	0	0	0	0	0	0	67925000	0	0	0	0	0	0	0	0	0	0	50278000
Q6UX71	Q6UX71	PLXDC2	298980000	462120000	408200000	403540000	292270000	594390000	273110000	408760000	372380000	544920000	326990000	338530000	513920000	415420000	270560000	574280000	318210000	431820000	359520000	380270000	364780000	523890000	432530000	400820000	349500000	594210000	316310000	541310000	361020000	391770000	346040000	496700000	247550000	466850000	406440000	1106400000	484220000	627090000	358050000	359510000	610850000	396470000	470180000	250590000	231150000	359370000	250420000
Q6UXB8	Q6UXB8	PI16	885280000	1348400000	613560000	643000000	882310000	1041000000	1161400000	1727900000	674830000	711630000	884340000	964920000	671870000	981620000	1017400000	826110000	535380000	953690000	641160000	750420000	799470000	191510000	735190000	1251600000	832130000	1197800000	865480000	824340000	635840000	788070000	905480000	1298900000	542870000	0	618340000	904710000	894810000	1585600000	188410000	644000000	760100000	1411100000	232960000	736730000	1315100000	95315000	1119300000
Q6UY14	Q6UY14	ADAMTSL4	0	0	0	0	0	0	0	0	0	0	0	0	0	0	0	0	0	0	0	0	13380000	0	0	0	0	0	0	0	0	0	0	0	0	0	0	60336000	0	0	0	0	29986000	0	0	0	0	0	0
Q6XQN6	Q6XQN6	NAPRT	0	0	0	0	0	0	0	0	0	0	0	0	0	0	0	0	0	0	0	0	0	0	0	0	0	0	0	0	0	0	0	0	0	0	0	0	0	0	0	0	0	0	0	0	0	0	0
Q6YHK3	Q6YHK3	CD109	19084000	0	0	28759000	0	0	0	0	0	0	0	0	0	45824000	0	0	20013000	20375000	0	30932000	36667000	0	22172000	25258000	0	0	0	31891000	0	0	25910000	0	0	24229000	43169000	50979000	0	22936000	21911000	0	36400000	33314000	0	29747000	0	0	26721000
Q76LX8	Q76LX8	ADAMTS13	23138000	0	0	31582000	23016000	36285000	41238000	0	0	30702000	0	0	0	0	20035000	0	0	18343000	0	0	34832000	0	27113000	35025000	0	0	0	0	0	21426000	0	0	0	0	0	49922000	0	0	0	0	0	0	0	0	0	0	0
Q7Z4W1	Q7Z4W1	DCXR	21123000	0	0	0	0	0	0	0	0	0	0	0	0	0	0	0	0	0	0	0	0	0	0	0	0	0	0	0	0	0	0	0	0	0	0	0	0	0	0	0	0	0	0	0	0	17204000	79898000
Q7Z5L0	Q7Z5L0	VMO1	0	0	0	0	0	0	0	0	0	0	0	0	0	0	0	0	0	0	0	0	0	0	0	0	0	0	0	0	0	0	0	0	0	0	0	0	0	0	0	0	0	0	0	0	0	0	0
Q7Z7G0	Q7Z7G0	ABI3BP	118040000	179250000	107610000	1113900000	2001900000	147330000	245710000	120300000	90117000	74951000	85816000	72544000	76443000	434660000	96773000	186670000	138730000	140250000	119560000	105170000	102200000	249900000	1950200000	61159000	45225000	97519000	65255000	0	88002000	130460000	105220000	0	217400000	119830000	441280000	195630000	503140000	160710000	5761900000	0	0	111490000	172260000	0	0	130360000	174560000
Q86SQ4	Q86SQ4	GPR126	0	0	0	32165000	0	0	0	0	0	0	31985000	0	0	0	0	0	0	0	0	0	0	0	25739000	0	0	0	0	0	0	0	0	0	0	0	0	74012000	0	0	0	0	0	0	0	0	0	40307000	0
Q86U17	Q86U17	SERPINA11	60487000	84065000	48354000	77103000	57631000	28706000	41783000	92386000	48634000	85070000	47806000	49266000	0	74896000	46825000	22678000	46719000	0	0	137180000	79920000	76247000	119380000	85882000	117520000	63223000	57051000	68766000	18881000	37308000	69049000	0	0	0	0	0	0	78852000	0	0	0	0	0	91179000	54637000	0	63688000
Q86UD1	Q86UD1	OAF	95420000	134390000	87687000	104610000	110850000	102620000	88438000	106380000	63372000	89765000	91633000	105290000	60775000	151990000	96774000	136160000	103020000	104900000	100270000	69882000	80731000	113700000	73959000	118740000	73367000	49570000	54990000	99123000	132950000	99794000	99983000	0	221120000	229210000	191440000	143990000	142480000	242480000	207960000	170280000	107810000	138170000	99971000	118730000	153820000	129190000	218500000
Q86VB7	Q86VB7	CD163	339310000	470220000	516210000	551260000	711550000	844720000	410760000	421660000	298750000	456450000	113250000	116690000	259010000	511110000	327040000	748620000	643930000	377370000	541830000	410420000	235090000	836280000	414260000	588850000	375870000	363270000	555870000	1096000000	275560000	652590000	291040000	2829500000	46223000	1286200000	1940200000	14301000000	68481000	1268900000	2788400000	169970000	1667600000	922180000	84698000	1580200000	1394400000	1741000000	1262400000
Q86YW5	Q86YW5	TREML1	69636000	84980000	0	109140000	91640000	87804000	0	48625000	0	0	97448000	103240000	112400000	0	126010000	116000000	0	0	0	66482000	73758000	0	64326000	56285000	94716000	0	0	0	76336000	89353000	0	0	0	131370000	0	0	110720000	101900000	0	0	0	0	0	171770000	0	118940000	63077000
Q8IWU5	Q8IWU5	SULF2	0	0	0	0	0	0	0	0	0	0	0	0	0	0	0	0	0	0	0	0	0	0	0	0	0	0	0	0	0	0	0	0	0	0	0	0	0	0	0	0	0	0	0	0	0	0	0
Q8IXL6	Q8IXL6	FAM20C	0	0	0	0	0	0	0	0	0	0	0	101580000	154170000	0	0	0	0	0	106680000	91650000	0	0	0	0	0	0	0	0	0	0	92127000	0	66274000	81126000	0	0	0	77024000	94529000	93674000	0	119480000	0	0	141050000	0	0
Q8IZF2	Q8IZF2	GPR116	36121000	58435000	82874000	149270000	81112000	145340000	42623000	55361000	122540000	77854000	56661000	156280000	122100000	162600000	96341000	85065000	0	104430000	0	123500000	0	241230000	0	0	113750000	76901000	56549000	61080000	155670000	106240000	57117000	72088000	94708000	83009000	111180000	79784000	95734000	107330000	207600000	285190000	73573000	103810000	100440000	84821000	28345000	47090000	108480000
Q8N6Q3	Q8N6Q3	CD177	0	0	0	0	0	0	0	0	0	0	0	0	0	0	0	0	0	0	0	0	0	0	0	0	0	0	0	0	0	0	0	0	106880000	0	0	0	0	0	0	0	0	0	0	0	0	0	0
Q8N8K9	Q8N8K9	KIAA1958	56858000	68055000	107050000	121160000	103120000	182800000	693230000	79726000	101130000	118140000	139840000	132750000	0	40169000	50471000	61204000	151850000	67264000	83893000	206120000	45784000	0	79579000	104550000	127640000	70732000	83133000	162300000	155410000	57857000	104640000	86028000	60534000	140530000	140910000	25177000	0	34537000	73099000	88835000	96152000	18666000	50116000	0	86146000	0	100380000
Q8NBJ4	Q8NBJ4	GOLM1	0	0	90728000	86980000	58022000	56040000	0	0	69944000	144850000	0	0	81378000	32741000	103870000	0	69331000	78574000	60394000	59524000	76035000	147310000	92264000	78769000	93462000	93755000	274210000	182610000	98578000	41190000	83245000	117700000	65690000	345330000	122770000	474240000	184460000	134090000	403220000	0	133350000	141800000	0	0	59010000	235590000	94725000
Q8NBP7	Q8NBP7	PCSK9	0	0	0	54030000	0	116400000	0	0	0	30203000	0	0	57702000	0	41807000	93782000	154460000	0	0	31190000	34140000	22505000	0	29380000	0	0	0	0	47632000	25562000	0	26719000	110690000	0	46149000	0	0	57864000	153990000	0	272690000	55132000	49493000	0	44396000	375880000	0
Q8NHW5	Q8NHW5	RPLP0P6	11127000000	11854000000	6652900000	5218600000	8420500000	5588300000	11149000000	0	8371300000	9181200000	6446400000	4644800000	4771100000	5294800000	9231800000	0	4991600000	3655000000	6495600000	3543500000	7579700000	2709800000	6249500000	10555000000	10288000000	11119000000	9148000000	2791400000	8316900000	6364100000	5458400000	2477900000	1504500000	0	6136100000	4425400000	4481700000	2705800000	2872600000	1851600000	4973600000	1143500000	3209500000	4847900000	3548900000	6305700000	7171900000
Q8NI22	Q8NI22	MCFD2	0	0	0	0	0	0	0	0	0	0	0	0	0	0	0	0	0	0	0	0	0	0	0	0	0	0	0	0	0	0	0	0	0	0	0	0	0	0	0	0	0	0	0	0	55688000	0	0
Q8TEH3	Q8TEH3	DENND1A	0	0	0	0	0	0	0	0	0	0	0	0	0	0	0	0	0	0	0	0	0	0	0	0	0	0	0	0	0	0	0	0	0	0	0	0	0	0	44587000	28773000	45275000	0	23091000	0	0	0	0
Q8WU39	Q8WU39	MZB1	0	0	0	0	0	0	0	0	0	0	0	0	0	0	0	0	0	0	0	0	0	0	0	0	0	0	0	0	0	0	0	0	0	0	0	0	0	0	0	0	0	0	0	0	0	0	0
Q8WUA8	Q8WUA8	TSKU	0	0	0	0	0	0	0	0	0	0	0	0	0	0	0	0	0	0	0	0	0	0	0	0	0	0	0	0	0	0	0	0	46792000	68662000	0	0	0	0	0	0	0	0	0	0	0	0	0
Q8WVN6	Q8WVN6	SECTM1	0	0	0	0	0	0	0	53774000	0	0	0	0	0	0	0	0	0	0	51972000	0	0	0	0	0	0	0	0	0	0	0	0	203920000	50684000	0	0	68066000	0	58521000	0	0	0	0	0	0	0	0	50462000
Q8WWZ8	Q8WWZ8	OIT3	0	0	0	0	0	0	0	0	0	0	37442000	0	0	0	0	0	33822000	0	16684000	0	0	0	34095000	37372000	0	40966000	0	0	0	0	51842000	0	0	43684000	0	0	41648000	0	44781000	112070000	30403000	0	49995000	0	0	28915000	36653000
Q8WZ42	Q8WZ42	TTN	717370000	110330000	478010000	801460000	707060000	854120000	586300000	626000000	418520000	253270000	485670000	674100000	653860000	480400000	482370000	657070000	273940000	370890000	516710000	438260000	550950000	610310000	988740000	829180000	1199800000	476010000	506080000	431830000	723870000	259130000	353290000	1559900000	1352200000	683410000	421070000	1488900000	1122700000	2656100000	3462700000	4244200000	741990000	2469500000	931440000	589080000	1762900000	1264700000	766690000
Q8WZ75	Q8WZ75	ROBO4	0	0	28090000	0	0	0	0	25224000	0	0	41313000	0	0	0	0	0	0	0	0	0	59016000	0	23819000	60567000	0	0	0	61214000	0	20304000	0	71149000	0	68742000	46445000	699680000	44519000	53847000	0	0	49465000	0	0	0	0	34734000	62065000
Q92496	Q92496	CFHR4	162220000	260130000	134120000	188850000	114010000	0	57086000	176350000	141960000	214000000	103570000	0	0	186240000	0	0	145600000	182100000	74808000	0	177440000	0	0	0	121580000	0	0	369690000	85110000	85621000	0	107550000	229670000	93234000	184240000	0	194410000	111850000	110120000	128900000	82857000	178330000	286550000	110610000	90230000	100580000	111570000
Q92743	Q92743	HTRA1	0	0	0	0	0	0	0	0	0	0	0	0	0	0	0	0	0	0	0	0	0	0	0	0	0	0	0	0	0	0	0	132820000	73799000	0	45760000	0	0	0	69420000	64295000	0	102460000	89752000	0	0	0	0
Q92820	Q92820	GGH	519940000	330580000	613770000	462480000	637630000	288480000	564160000	720680000	408390000	305730000	383190000	384580000	522690000	635260000	581230000	587600000	623930000	502470000	409650000	382890000	551070000	419850000	433310000	815860000	767890000	708110000	523630000	766090000	201150000	467180000	939140000	520360000	525830000	351170000	554610000	0	381630000	364850000	708450000	122950000	264870000	378250000	406080000	464310000	484860000	534440000	232090000
Q92835	Q92835	INPP5D	665630000	1052100000	2035200000	1273300000	1054600000	1767400000	357080000	248290000	499050000	466470000	420660000	636150000	1262500000	905630000	648450000	501920000	363720000	812350000	371290000	398190000	903290000	493590000	828910000	1982900000	2030900000	1062900000	199820000	1244500000	587100000	986270000	2480600000	1669100000	523670000	1758700000	549880000	694030000	1512900000	2115100000	1224600000	1107500000	1026500000	562580000	386140000	0	1201000000	0	772810000
Q92954	Q92954	PRG4	851160000	530480000	581940000	1086400000	775640000	912210000	694430000	530560000	1119600000	1535900000	518940000	607880000	560180000	486660000	549730000	239980000	1003500000	556710000	837360000	331100000	661150000	348170000	599200000	582920000	1030600000	1166500000	512190000	521310000	1032700000	694440000	562460000	185870000	996150000	601870000	500460000	567350000	622600000	608690000	632270000	353840000	308910000	1028200000	201930000	723870000	412860000	1444800000	762060000
Q93088	Q93088	BHMT	0	0	0	0	0	0	0	0	0	2254100	0	0	0	0	0	0	0	0	0	0	0	0	0	0	0	0	0	0	5751100	0	0	223110000	0	72962000	0	0	0	0	0	0	0	0	0	0	0	0	126930000
Q93099	Q93099	HGD	10965000	17220000	17079000	0	0	19673000	0	0	6459300	0	17153000	0	11882000	7393300	30040000	0	0	0	0	15264000	0	16863000	0	0	0	0	7243700	12732000	0	0	0	0	0	11362000	0	0	0	0	0	0	0	0	0	0	0	0	0
Q96A32	Q96A32	MYLPF	0	0	0	0	0	0	0	16461000	0	0	0	0	0	0	0	0	0	0	0	0	0	0	0	0	0	0	0	0	0	0	0	0	42332000	81612000	0	0	87469000	0	0	0	144160000	0	0	0	0	0	0
Q96BY2	Q96BY2	MOAP1	150010000	70020000	216260000	129500000	0	148130000	175460000	0	0	0	164250000	0	0	221390000	145400000	0	135780000	0	0	0	155350000	217630000	0	69944000	87673000	70246000	165420000	0	238730000	140690000	96425000	0	0	0	101120000	0	0	45836000	0	61109000	0	0	151330000	147900000	0	119730000	176380000
Q96C11	Q96C11	FGGY	0	0	0	0	0	0	0	0	0	0	0	0	0	0	0	0	0	0	0	0	0	0	0	0	0	0	0	0	0	0	0	0	0	0	0	0	0	0	0	0	0	0	0	0	0	0	0
Q96C23	Q96C23	GALM	114740000	0	94927000	96332000	151380000	110010000	74812000	142880000	133530000	108150000	0	68144000	104370000	0	109230000	0	120470000	35898000	0	245550000	119840000	205050000	136720000	0	51939000	0	103700000	0	98603000	0	98926000	0	0	0	0	0	0	0	0	0	0	0	0	269980000	0	0	0
Q96EE4	Q96EE4	CCDC126	0	0	43511000	53401000	52353000	41675000	0	36048000	0	40072000	38595000	0	0	48584000	27607000	39894000	0	48340000	28886000	70240000	53084000	0	45402000	40789000	51282000	60531000	39794000	94801000	53671000	0	37331000	0	0	0	0	0	0	0	0	0	0	0	0	26692000	0	0	0
Q96FE7	Q96FE7	PIK3IP1	0	0	0	0	22743000	0	0	0	0	0	0	0	0	0	0	0	0	0	0	0	0	0	0	0	0	0	0	0	0	0	0	201070000	0	0	0	140910000	41835000	0	0	0	0	0	0	0	0	0	0
Q96I99	Q96I99	SUCLG2	0	0	0	0	0	0	62075000	0	0	0	0	0	0	0	0	0	0	0	0	0	0	0	0	0	0	0	0	0	0	0	0	0	0	0	0	0	0	0	0	0	0	0	0	0	0	0	0
Q96IU4	Q96IU4	ABHD14B	0	140830000	72508000	0	0	0	51768000	35257000	47640000	64434000	0	70949000	85647000	0	0	45044000	0	0	52118000	68178000	0	74941000	53481000	0	0	0	0	0	0	0	39740000	94232000	37567000	54162000	0	74881000	0	0	54996000	0	0	90303000	0	0	82247000	0	70971000
Q96IY4	Q96IY4	CPB2	1179500000	2301700000	2369400000	1890700000	1632400000	1844800000	1157100000	1995800000	2140300000	2574800000	2124500000	1014800000	1793700000	1614000000	2130300000	1639700000	1474100000	2568900000	1019600000	2131900000	1787000000	1910400000	2183100000	1158800000	2787900000	905900000	1298400000	1959500000	2190200000	2957200000	1903900000	1806400000	1940100000	1526600000	1640700000	522070000	1500500000	1389100000	1620600000	1599200000	1067600000	1439200000	1542800000	2470100000	1000100000	1387700000	1884400000
Q96KN2	Q96KN2	CNDP1	3541700000	3018400000	2849300000	2222900000	3535400000	2291700000	4602000000	1841400000	3612500000	1944900000	3723100000	2144100000	1533700000	3165200000	3557000000	2049100000	3892400000	2999100000	3655300000	5034000000	4627000000	4985600000	2541500000	3485800000	3839400000	2089900000	2748500000	3692200000	1964000000	4316200000	2712800000	831740000	1144800000	948040000	13664000	95711000	1254000000	443120000	1394600000	2001200000	34187000	3208200000	1682700000	2247900000	2397000000	1965600000	1541500000
Q96KP4	Q96KP4	CNDP2	0	77690000	211050000	209550000	235420000	354900000	184710000	198330000	317960000	170440000	202660000	393060000	165950000	304980000	0	291040000	0	360990000	328990000	177240000	247430000	348850000	0	0	217680000	0	0	234540000	254050000	237610000	129380000	233790000	235480000	0	295140000	340940000	129670000	0	217750000	480990000	340010000	211170000	330170000	227170000	109730000	218810000	0
Q96N76	Q96N76	UROC1	0	0	0	0	0	0	0	0	0	0	0	0	0	0	0	0	0	0	0	0	50485000	0	0	47789000	0	0	0	88413000	0	0	0	0	0	0	0	0	0	0	0	0	0	0	0	0	0	35686000	0
Q96NU7	Q96NU7	AMDHD1	0	0	0	0	0	0	0	0	0	104550000	0	0	0	0	0	0	0	0	0	0	0	0	0	0	75968000	0	0	0	0	0	0	0	0	0	0	0	0	47421000	49110000	51462000	102970000	0	0	0	0	0	0
Q96NZ9	Q96NZ9	PRAP1	24481000	0	0	0	0	41340000	0	82853000	0	33046000	0	0	0	51057000	0	29814000	34436000	59318000	0	29310000	0	72405000	0	31671000	0	0	0	0	49408000	49541000	0	193710000	32282000	131410000	46336000	83102000	113060000	0	0	0	0	197160000	0	156180000	26966000	0	152250000
Q96PD5	Q96PD5	PGLYRP2	14140000000	17124000000	16764000000	16552000000	11728000000	16998000000	16185000000	12685000000	19036000000	18909000000	16549000000	14452000000	20950000000	18300000000	15293000000	13648000000	12690000000	16067000000	15073000000	18667000000	22075000000	17662000000	15120000000	15643000000	17279000000	21355000000	12319000000	22652000000	16273000000	15755000000	18189000000	6531200000	11500000000	6443500000	8609600000	3128700000	11360000000	10086000000	7683500000	12381000000	9785400000	8443100000	10113000000	13525000000	10860000000	11173000000	11808000000
Q96RL7	Q96RL7	VPS13A	572210000	101920000	687320000	230940000	628880000	128010000	1168300000	442500000	578690000	1102500000	359840000	457670000	957620000	572290000	490540000	96952000	572790000	251070000	1037300000	562390000	293880000	295720000	497580000	826930000	1195700000	228640000	1375400000	410300000	141010000	312190000	620240000	982290000	397670000	308700000	595250000	758820000	606830000	541860000	402970000	704370000	1240000000	638610000	206940000	441390000	1374800000	180740000	519690000
Q99497	Q99497	PARK7	0	0	0	0	0	0	0	0	0	0	0	0	0	0	0	0	0	0	0	0	0	0	0	0	0	0	0	0	0	0	0	0	0	0	0	0	0	0	0	0	0	0	0	22367000	0	0	0
Q99784	Q99784	OLFM1	54546000	111310000	0	84625000	111210000	51985000	69653000	94220000	80948000	111800000	104430000	125690000	119540000	90541000	116440000	87097000	149250000	120660000	111850000	113280000	55814000	102200000	108660000	98510000	111700000	93176000	115150000	195800000	119870000	0	118800000	573840000	83446000	201890000	128000000	288760000	55103000	116210000	141770000	62406000	136120000	0	93442000	164020000	115030000	83295000	106840000
Q99798	Q99798	ACO2	0	0	0	0	0	0	0	0	0	0	0	0	0	0	0	0	0	0	0	0	0	0	0	0	0	0	0	0	0	0	0	0	0	0	0	0	0	0	0	0	0	0	0	0	0	0	0
Q99972	Q99972	MYOC	0	0	0	0	0	0	0	0	0	0	0	0	0	0	0	0	0	0	0	0	0	0	0	0	0	0	0	0	0	0	0	0	0	0	0	0	0	0	0	623850000	0	0	0	139780000	0	0	0
Q99996	Q99996	AKAP9	218070000	258040000	172960000	72250000	133550000	127660000	287540000	0	344700000	130810000	178830000	326750000	259720000	147020000	219070000	0	102330000	191500000	157000000	400130000	114220000	254970000	255360000	195750000	176830000	100660000	177600000	177790000	91635000	151590000	205710000	302830000	329500000	382280000	199200000	237140000	294020000	308100000	320250000	246580000	0	371730000	62111000	69260000	0	120350000	311550000
Q9BRK5	Q9BRK5	SDF4	0	0	0	0	0	0	0	0	0	0	0	0	0	0	0	0	0	0	0	0	0	0	0	32996000	0	0	0	0	0	0	0	0	0	0	0	53383000	0	0	0	0	0	0	0	0	0	0	348340000
Q9BTY2	Q9BTY2	FUCA2	102360000	0	91487000	87411000	102150000	124350000	69650000	73566000	77227000	54911000	93294000	99355000	125040000	102840000	123410000	52608000	82252000	87505000	127740000	71725000	111870000	76884000	54837000	55157000	108670000	188410000	93738000	0	93782000	96603000	0	159540000	0	142780000	153800000	187010000	94740000	159100000	107670000	70063000	111840000	126660000	82534000	91419000	46833000	89639000	51486000
Q9BV57	Q9BV57	ADI1	97426000	0	124220000	0	0	0	0	0	0	0	0	0	0	0	0	0	0	0	0	0	0	0	0	0	0	0	0	0	0	0	0	0	0	0	0	0	0	0	0	156800000	0	0	0	236030000	0	0	0
Q9BWD1	Q9BWD1	ACAT2	71436000	0	22048000	0	0	0	0	0	0	0	0	0	48528000	0	19119000	97650000	0	0	0	0	0	63488000	31396000	0	0	0	0	0	0	0	0	55381000	0	0	0	125620000	0	0	0	0	0	0	0	0	77713000	0	130710000
Q9BWP8	Q9BWP8	COLEC11	157830000	125950000	92183000	141000000	96706000	144850000	134970000	124860000	100950000	111270000	110660000	57297000	130460000	115230000	110730000	111100000	117990000	116300000	101300000	100140000	166010000	95327000	92625000	202590000	139170000	200720000	105400000	108370000	100330000	120150000	66265000	0	121410000	143140000	130430000	298630000	105300000	125950000	89143000	53824000	68637000	153250000	113970000	89433000	84351000	121520000	145470000
Q9BX68	Q9BX68	HINT2	0	0	0	0	0	0	0	0	0	0	0	0	0	0	0	0	0	0	0	0	0	0	0	0	0	0	0	0	0	0	0	0	0	0	0	0	0	0	0	0	0	0	0	0	0	0	0
Q9BY67	Q9BY67	CADM1	0	0	0	12887000	0	0	0	0	0	0	15286000	0	0	28478000	0	0	0	0	0	0	0	0	0	0	0	0	0	0	0	0	0	0	0	0	0	65987000	0	0	0	0	18386000	0	41709000	0	0	0	0
Q9BYE9	Q9BYE9	CDHR2	0	0	0	0	0	0	0	0	0	0	0	0	0	0	0	0	0	0	44577000	0	0	0	0	0	0	0	0	0	0	0	0	36760000	0	47930000	48500000	941050000	0	0	2735300000	0	0	0	0	0	0	30236000	768610000
Q9BYJ0	Q9BYJ0	FGFBP2	22826000	0	0	0	0	0	0	0	0	0	0	0	0	0	0	0	48818000	0	0	45016000	0	0	0	0	0	0	0	0	0	0	0	0	0	0	0	0	0	0	0	0	0	0	0	0	0	0	31851000
Q9H257	Q9H257	CARD9	157420000	234320000	156480000	64289000	0	26599000	49016000	0	83096000	302410000	100550000	0	153870000	56755000	128640000	88729000	57092000	74899000	130570000	216770000	0	0	107150000	150630000	64655000	63217000	0	82875000	187780000	62123000	76260000	110830000	102180000	219680000	206810000	91961000	459190000	301090000	78541000	644280000	303060000	0	128670000	111690000	123560000	0	69230000
Q9H299	Q9H299	SH3BGRL3	0	0	0	42842000	0	30318000	0	51768000	0	0	41946000	0	156230000	0	0	0	44682000	0	56284000	57021000	0	0	0	0	66189000	73883000	0	45849000	0	29240000	87010000	145430000	0	154900000	0	0	71136000	98191000	0	115990000	0	0	0	108330000	32420000	0	66873000
Q9H2M3	Q9H2M3	BHMT2	0	0	0	0	0	0	0	0	0	0	0	0	0	40891000	0	0	0	182070000	0	0	0	0	0	0	75792000	0	0	0	0	0	0	0	0	0	0	0	0	0	0	0	0	0	0	0	0	0	0
Q9H4A4	Q9H4A4	RNPEP	572060000	2449900000	475210000	324720000	902520000	1111900000	221570000	179450000	241900000	240950000	447720000	519330000	427680000	340280000	153530000	844120000	299660000	0	2904700000	190650000	640860000	599000000	0	0	179480000	205580000	908080000	1065600000	190950000	164920000	174490000	1173100000	507980000	3638800000	1542100000	0	2644400000	4549500000	1154800000	3823600000	2483300000	547390000	1443300000	26699000	2003800000	281270000	5092800000
Q9H8L6	Q9H8L6	MMRN2	136190000	86932000	104890000	182120000	146340000	105450000	150770000	0	112010000	103310000	0	0	137780000	114850000	104680000	0	178710000	207560000	177450000	0	94958000	0	97571000	113270000	0	134210000	70592000	122510000	127900000	73325000	124660000	74650000	0	0	0	260570000	0	210040000	186000000	0	133430000	133510000	158170000	113280000	108270000	0	0
Q9HAV7	Q9HAV7	GRPEL1	0	0	0	0	0	0	0	0	0	0	0	0	0	0	0	0	0	0	0	0	0	0	0	0	0	0	0	0	0	0	0	0	0	0	0	0	0	0	0	0	0	0	0	0	0	0	0
Q9HBR0	Q9HBR0	SLC38A10	0	0	0	0	0	0	0	0	0	92191000	51125000	0	49648000	0	0	0	0	0	0	0	0	0	0	0	0	0	0	0	0	0	0	65203000	0	95323000	0	0	78741000	0	0	100530000	0	0	0	0	0	0	0
Q9HD89	Q9HD89	RETN	0	0	0	0	0	0	0	0	0	0	0	0	0	0	0	0	0	0	0	0	0	0	0	0	0	51720000	0	0	0	41090000	0	0	0	0	0	310060000	0	0	0	0	0	64224000	0	103510000	94386000	0	52615000
Q9HDC9	Q9HDC9	APMAP	216090000	326760000	424180000	178780000	381170000	598910000	204870000	339980000	222980000	218710000	618240000	318220000	356210000	371580000	223400000	235780000	452000000	252250000	180010000	280510000	421170000	347400000	356040000	259610000	152100000	123820000	256930000	215750000	572450000	449520000	227840000	199370000	333510000	251640000	44011000	182980000	229180000	167470000	260920000	270260000	218400000	370810000	329280000	315270000	171500000	153210000	524970000
Q9NNW7	Q9NNW7	TXNRD2	0	66431000	0	0	0	0	0	0	0	0	0	0	0	0	0	0	0	45197000	0	0	0	0	0	0	0	0	0	0	0	0	0	0	0	0	0	0	0	0	0	0	0	0	0	0	0	0	0
Q9NPH3	Q9NPH3	IL1RAP	95306000	154200000	200720000	149130000	125960000	105750000	163190000	110680000	88605000	155020000	207800000	159400000	153990000	170030000	80986000	145160000	139470000	164180000	166570000	169850000	284610000	136570000	256060000	182870000	170050000	136110000	113150000	188270000	138990000	220730000	172680000	162920000	134660000	150910000	163430000	122400000	186450000	0	126540000	0	190180000	225060000	122320000	93633000	108630000	157150000	142380000
Q9NPR2	Q9NPR2	SEMA4B	0	0	38928000	0	42215000	34655000	57851000	0	102670000	81790000	0	0	44884000	0	0	0	0	72345000	0	0	44308000	0	50238000	0	0	74091000	47130000	51809000	0	46943000	50367000	124830000	0	59993000	49925000	134360000	40247000	63139000	98163000	58214000	67610000	113590000	74228000	0	50895000	73210000	95915000
Q9NPY3	Q9NPY3	CD93	26583000	0	0	16735000	0	18098000	33122000	40718000	0	0	23442000	0	0	17198000	0	23466000	0	0	17853000	19381000	27504000	0	37656000	23928000	25911000	23992000	25915000	33744000	0	0	18464000	47004000	0	56302000	24663000	73562000	0	0	22618000	33818000	32494000	24528000	25239000	20616000	21739000	0	20582000
Q9NQ79	Q9NQ79	CRTAC1	485920000	663830000	489920000	454060000	558860000	564020000	1171400000	899550000	739090000	736380000	529530000	297630000	672520000	814270000	702340000	806090000	1089700000	652820000	400390000	557450000	1242300000	727450000	794630000	612940000	571130000	413690000	457790000	998740000	1078900000	510860000	647940000	460970000	163950000	178560000	0	429020000	72273000	479990000	0	0	772370000	318240000	213950000	627340000	646670000	25022000	522560000
Q9NQR4	Q9NQR4	NIT2	0	0	0	0	0	0	0	0	0	0	0	0	0	0	0	0	0	21934000	0	0	0	0	0	0	0	0	0	0	0	0	0	0	0	0	0	0	0	0	0	0	0	0	0	0	0	0	0
Q9NR09	Q9NR09	BIRC6	2088500000	730210000	420030000	672510000	752960000	297480000	1935500000	1440900000	271920000	2487900000	1120600000	1658300000	212050000	493390000	971730000	2263000000	0	856810000	2649300000	2847000000	2944900000	577730000	6944700000	3286800000	1359000000	326460000	2711900000	673240000	2541700000	1917300000	282810000	1443700000	558760000	1773100000	940410000	152970000	234050000	1041600000	113520000	921560000	558550000	460740000	466190000	822530000	2000300000	1335200000	1974100000
Q9NRX4	Q9NRX4	PHPT1	0	0	0	0	0	0	0	0	0	0	0	0	0	0	0	0	0	0	0	0	0	0	0	0	0	0	0	0	0	0	0	0	0	0	0	0	0	0	0	0	0	0	0	0	0	0	0
Q9NSA1	Q9NSA1	FGF21	0	0	0	0	0	0	0	0	0	0	0	0	0	0	0	0	0	0	0	0	0	0	0	0	0	0	0	0	0	0	0	0	0	41493000	0	0	0	0	0	0	0	0	0	0	0	0	0
Q9NU22	Q9NU22	MDN1	440640000	155400000	160260000	271120000	229300000	151220000	260430000	232720000	178630000	87050000	96503000	148590000	174740000	238910000	272770000	457250000	257450000	144390000	226300000	133740000	369460000	276350000	150650000	260570000	334490000	117070000	0	345770000	285330000	262160000	107330000	0	112190000	0	0	0	230880000	0	0	203100000	0	0	0	0	66078000	0	138780000
Q9NVS9	Q9NVS9	PNPO	0	0	0	0	0	0	0	0	0	0	0	0	0	0	0	0	0	0	0	0	0	0	0	0	0	0	0	0	0	0	0	0	0	0	0	0	0	0	0	0	0	0	0	0	0	0	0
Q9NY33	Q9NY33	DPP3	0	0	0	0	0	0	0	0	0	0	0	0	0	0	0	0	0	0	0	0	0	0	0	0	0	0	0	0	0	0	0	0	0	0	0	0	0	0	0	0	0	0	0	0	0	0	0
Q9NZP8	Q9NZP8	C1RL	3046900000	2458600000	3023100000	2532200000	2225800000	2670600000	2361900000	2641600000	1977000000	2495300000	2687400000	2076200000	2059700000	2818300000	3014400000	3121900000	2352700000	2315600000	2233600000	2522000000	2565100000	3103900000	2906900000	3711400000	2781600000	2614600000	2749600000	2909800000	1750500000	1998700000	2750000000	3137700000	2831400000	2588000000	3289700000	3490000000	3362600000	3035500000	3706500000	1987300000	3419700000	2114600000	2724400000	1398200000	2610900000	3013800000	2425400000
Q9P0Z9	Q9P0Z9	PIPOX	0	0	0	0	0	0	0	0	0	0	0	0	0	0	0	0	0	0	0	0	0	0	0	0	0	0	0	0	0	0	0	0	0	0	0	0	0	0	0	0	0	0	0	0	0	0	0
Q9UBP4	Q9UBP4	DKK3	0	0	0	0	0	0	0	0	0	0	0	27217000	0	0	0	0	0	0	0	0	0	0	0	0	0	0	0	0	0	0	0	0	0	0	0	50281000	0	0	0	0	66528000	25503000	0	0	0	0	0
Q9UBQ7	Q9UBQ7	GRHPR	0	0	0	0	0	0	0	0	0	0	0	0	0	0	0	0	0	0	0	0	0	0	0	0	0	0	6486200	0	0	0	0	8812900	0	0	0	0	0	0	0	0	0	0	0	0	0	0	5530500
Q9UBR1	Q9UBR1	UPB1	0	0	0	0	0	0	0	0	0	0	0	0	0	0	65158000	0	0	0	0	0	0	0	0	0	0	0	0	0	0	0	0	82494000	0	0	0	0	0	26470000	0	0	36021000	0	0	0	0	0	66811000
Q9UBR2	Q9UBR2	CTSZ	0	0	0	0	0	0	0	0	0	0	0	0	0	0	0	0	0	0	0	0	0	0	0	0	0	0	0	0	0	0	0	0	0	0	58692000	0	55889000	0	0	53682000	0	0	33860000	0	70107000	0	56879000
Q9UBX5	Q9UBX5	FBLN5	0	0	0	0	0	0	44186000	0	0	0	0	0	0	0	0	0	0	0	0	0	0	0	0	0	0	0	0	0	0	0	0	48316000	0	34754000	0	0	0	0	0	0	0	0	0	0	0	0	0
Q9UGM5	Q9UGM5	FETUB	2051200000	2716000000	2968200000	2822200000	2766400000	2979700000	2615800000	1841100000	1998300000	3069600000	4430300000	2138800000	3367500000	3565600000	3104700000	2893300000	2937300000	3028800000	2751900000	2461300000	1935400000	4313800000	2491500000	2318800000	2723100000	3025800000	2260500000	2663500000	2676600000	3610600000	3019400000	532850000	1528600000	733890000	1663700000	513060000	796120000	461780000	2461300000	1609000000	400840000	549010000	1413700000	2642700000	2527100000	1075000000	2514000000
Q9UHG3	Q9UHG3	PCYOX1	574690000	477730000	450030000	500360000	857420000	481610000	612880000	221860000	600090000	763350000	868650000	524930000	625390000	347890000	303440000	659980000	456470000	390910000	444940000	728000000	727710000	204180000	447950000	302960000	353730000	337920000	121050000	355690000	1194100000	588280000	443780000	431800000	376350000	36428000	101360000	131140000	71051000	86553000	230500000	193060000	249290000	140040000	260180000	259600000	263790000	177000000	222670000
Q9UHI8	Q9UHI8	ADAMTS1	0	0	0	0	0	0	0	0	0	0	0	0	0	0	0	0	0	0	0	0	0	0	0	0	0	0	0	0	0	0	0	0	0	0	0	0	0	0	0	0	0	0	0	0	0	0	0
Q9UI17	Q9UI17	DMGDH	0	0	0	0	0	0	0	0	0	0	0	0	0	0	0	0	0	0	0	0	0	0	0	0	0	0	0	0	0	0	0	0	0	0	0	0	0	0	0	0	0	0	0	0	0	0	0
Q9UIB8	Q9UIB8	CD84	0	0	0	0	0	0	0	0	0	0	0	0	0	0	0	0	0	0	0	0	0	0	0	0	0	0	0	0	0	0	15889000	0	0	0	0	54012000	0	0	0	0	0	0	0	0	0	0	0
Q9UJJ9	Q9UJJ9	GNPTG	0	90871000	50166000	0	30053000	0	106620000	73867000	0	40526000	0	61539000	81638000	113010000	0	0	33848000	80531000	50018000	46312000	52354000	0	64997000	81454000	82070000	86922000	69009000	55153000	114580000	0	57257000	73580000	39697000	85112000	137240000	129150000	0	99238000	97318000	93532000	96605000	53650000	0	0	0	76531000	0
Q9UK55	Q9UK55	SERPINA10	1024600000	762060000	1027100000	1506000000	1035500000	1030300000	951690000	722480000	1226400000	796250000	1482000000	728120000	1322200000	952690000	1387200000	853000000	704310000	1045500000	1350800000	1236300000	1444200000	1163500000	1066600000	732450000	1138700000	1210700000	789690000	980380000	1055800000	985850000	957560000	697070000	1599000000	1032700000	829700000	1132700000	1831900000	1926200000	1763800000	1711900000	2275600000	1959800000	1625200000	907690000	1503900000	1111300000	1012700000
Q9UKK9	Q9UKK9	NUDT5	0	0	0	0	0	0	0	0	0	0	0	0	0	0	0	0	0	0	0	0	0	0	0	23581000	0	0	0	0	0	0	0	0	0	0	0	0	0	0	0	0	0	0	0	0	0	0	0
Q9UKX2	Q9UKX2	MYH2	0	0	0	0	0	0	0	0	0	0	0	0	0	0	0	0	0	0	0	0	0	0	0	0	0	0	0	0	0	0	0	0	220950000	0	0	0	0	0	0	0	0	0	0	0	0	0	0
Q9UL46	Q9UL46	PSME2	0	0	0	0	0	0	0	0	0	0	0	0	0	0	0	0	0	0	0	0	0	0	0	0	0	0	0	0	0	0	0	79946000	0	29384000	0	50838000	0	0	0	0	35233000	0	0	0	0	0	0
Q9ULA0	Q9ULA0	DNPEP	0	0	0	0	0	0	0	0	0	0	0	0	0	0	0	0	0	0	0	0	0	0	0	0	0	0	0	0	0	0	0	0	0	0	0	0	0	0	0	0	0	0	0	0	0	0	0
Q9ULC0	Q9ULC0	EMCN	0	0	0	0	0	0	0	0	0	0	0	23054000	0	0	0	17745000	0	0	0	0	0	0	0	67991000	52318000	0	38938000	0	0	0	0	52582000	0	0	0	0	0	0	0	0	0	0	0	0	0	0	0
Q9UN36	Q9UN36	NDRG2	0	0	0	0	0	0	0	0	0	0	0	0	0	0	0	0	0	0	0	0	0	0	0	0	0	0	0	0	0	0	0	0	0	0	0	0	0	0	0	0	0	0	0	0	0	0	0
Q9UNN8	Q9UNN8	PROCR	64579000	229130000	103080000	87898000	57900000	118250000	159710000	92814000	66737000	69510000	89394000	46899000	105180000	118460000	78128000	94675000	142480000	101980000	70091000	92502000	107790000	107530000	87066000	93717000	90389000	111970000	122020000	147350000	100350000	61698000	55971000	140040000	88822000	128680000	81820000	166860000	48598000	73984000	55783000	102270000	106600000	88466000	86463000	82637000	126240000	54864000	146230000
Q9Y240	Q9Y240	CLEC11A	0	0	0	0	0	0	0	0	0	0	0	0	0	0	0	0	0	0	0	0	0	0	0	0	0	0	0	0	0	0	0	0	0	30059000	0	0	0	29519000	0	0	24247000	0	0	0	0	26501000	22456000
Q9Y279	Q9Y279	VSIG4	0	0	0	0	0	0	0	25038000	0	0	0	0	0	34683000	0	0	0	0	0	0	0	0	0	0	0	0	0	0	0	0	0	156180000	103490000	966690000	434030000	1042100000	179620000	28298000	0	0	221230000	23519000	0	33212000	241750000	0	0
Q9Y287	Q9Y287	ITM2B	23460000	0	0	0	0	0	0	0	0	0	0	0	0	0	0	0	0	0	0	0	0	0	0	0	0	0	0	0	0	0	0	28429000	0	16926000	22613000	23978000	0	0	0	0	45387000	18415000	0	0	0	27385000	0
Q9Y2S2	Q9Y2S2	CRYL1	0	0	0	0	0	0	14821000	13685000	0	19971000	0	0	0	0	0	0	0	0	0	0	15585000	0	0	0	19691000	0	133360000	0	19592000	16875000	16179000	0	0	0	0	0	0	0	0	106270000	0	0	0	0	0	0	15899000
Q9Y2T3	Q9Y2T3	GDA	0	0	289200000	289470000	821460000	0	0	0	566250000	865870000	0	519480000	0	0	245080000	0	0	593640000	604220000	0	0	781710000	0	101760000	505780000	695100000	0	419260000	0	0	0	0	160500000	0	0	0	0	0	0	410170000	0	0	0	0	226570000	0	0
Q9Y490	Q9Y490	TLN1	15659000	55485000	0	44913000	27656000	31055000	42768000	0	13231000	0	0	11083000	0	0	0	0	0	0	24233000	0	0	0	0	0	0	16050000	0	0	24324000	0	82153000	20350000	0	137610000	0	31234000	14850000	22320000	0	0	0	0	0	37846000	0	11544000	0
Q9Y4E1	Q9Y4E1	FAM21C	0	0	0	0	380610000	0	0	0	0	0	0	0	0	0	0	0	0	0	0	0	0	0	0	0	0	0	0	0	0	0	0	0	321680000	0	1032400000	0	1288900000	0	935790000	0	0	539600000	0	0	0	0	0
Q9Y4L1	Q9Y4L1	HYOU1	139920000	175460000	106780000	116440000	124890000	114900000	103140000	213780000	0	0	85220000	0	115440000	134120000	77995000	127330000	79203000	0	142130000	91545000	106830000	78984000	0	120510000	165340000	94024000	98631000	48004000	100130000	58236000	72912000	188790000	137760000	315650000	323860000	191590000	281000000	125020000	177310000	116390000	191780000	95353000	130560000	132080000	92218000	148410000	60912000
Q9Y5C1	Q9Y5C1	ANGPTL3	0	0	0	0	0	0	0	0	0	0	0	0	0	0	0	0	0	0	0	0	0	0	0	85566000	45633000	0	0	0	0	0	0	0	58479000	91926000	86019000	0	58873000	87001000	0	0	59598000	0	0	0	0	142440000	0
Q9Y5Y7	Q9Y5Y7	LYVE1	342370000	409080000	388080000	220840000	399790000	365680000	441740000	371720000	362890000	568710000	413340000	337330000	367760000	505010000	315500000	524960000	389100000	319070000	391460000	424180000	584370000	405020000	359210000	554790000	484320000	464670000	304990000	492010000	269620000	290830000	313680000	580220000	456710000	1623900000	528630000	5204300000	662010000	758940000	683230000	537590000	787680000	866590000	548350000	421670000	416230000	472600000	369680000
Q9Y617	Q9Y617	PSAT1	0	0	0	0	0	0	0	0	13167000	19143000	0	0	0	0	0	0	0	0	0	0	0	0	0	0	0	0	0	0	0	0	0	0	0	8094400	16836000	0	0	19313000	17773000	18416000	0	0	18979000	0	0	0	0
Q9Y623	Q9Y623	MYH4	0	0	0	0	0	0	0	0	0	0	0	0	0	0	0	0	0	0	0	0	0	0	0	0	0	0	0	0	0	0	0	0	0	0	0	0	0	0	0	0	0	0	67287000	0	0	0	0
Q9Y696	Q9Y696	CLIC4	0	0	0	0	0	0	0	0	0	0	0	0	0	0	0	0	0	0	0	0	0	0	0	0	0	0	0	0	0	0	0	0	0	0	0	0	0	0	0	0	0	0	0	0	0	0	0
Q9Y6R7	Q9Y6R7	FCGBP	276320000	760670000	454550000	63108000	143050000	127230000	678850000	198930000	0	103420000	282200000	365680000	418050000	235360000	469300000	327650000	402730000	64613000	756650000	539520000	596830000	194610000	168560000	975040000	0	602800000	216700000	1222900000	114420000	26060000	28745000	1022400000	262550000	673290000	145930000	6241700000	483300000	55244000	2414100000	100120000	450370000	2177000000	759090000	368080000	40785000	488510000	408900000
Q9Y6Z7	Q9Y6Z7	COLEC10	210480000	310860000	388240000	460110000	370790000	361760000	365260000	377380000	95906000	0	0	266740000	0	311910000	255130000	391570000	12354000	388030000	0	364260000	437680000	0	341280000	2225400000	335260000	441400000	0	325380000	826860000	435320000	277790000	436620000	0	276290000	0	0	0	412670000	0	0	0	325750000	0	302870000	305100000	1610400000	0
[truncated: 43 more columns]
