# Supplementary material for: Serum proteomics reveals disorder of lipoprotein metabolism in sepsis
Source: Life Sci Alliance. 2021 Aug 24;4(10):e202101091. doi: 10.26508/lsa.202101091 (PMC8385306; doi:10.26508/lsa.202101091)
Supplement: Supplementary file 3 [file LSA-2021-01091_TableS3.xlsx]

## Sheet: Supplementary Table S3
Table S3. Comparison of protein abundance in patients with sepsis and NC subjects.
Protein IDs	Gene names	log2 FoldChange	P value	adjusted P value
ENSBTAP00000006074	ENSBTAP00000006074	-0.72436	0.0073155	0.0136007
P00761	P00761	0.28955	0.000211539	0.00053059
P01030	P01030	-0.0810119	0.566095	0.622704
P01966	P01966	1.4154	0.090632	0.131466
P02533	KRT14	0.943023	0.132369	0.187208
P02768	ALB	0.144151	0.00143478	0.00299038
P02769	P02769	-1.2057	0.249535	0.315705
P13645	KRT10	-0.0221958	0.156426	0.218115
P13647	KRT5	0.143882	0.493054	0.556266
Q1RMN8	Q1RMN8	-0.373235	0.0709908	0.105686
Q28107	Q28107	-1.06839	0.000200435	0.000515405
Q61782	Q61782	-1.42274	6.87874e-09	3.78331e-08
Q6IME9	KRT72	-0.642348	0.0488043	0.0750099
Q86YZ3	HRNR	-1.04954	0.000765154	0.00169274
P04264	KRT1	0.0485067	0.878417	0.898845
P07996	THBS1	-1.03524	3.80816e-07	1.52327e-06
P35527	KRT9	0.119786	0.780309	0.824006
P35908	KRT2	-0.255646	0.0833207	0.122204
A0M8Q6	IGLC7	0.493495	0.25511	0.319695
B9A064	IGLL5	0.154247	0.874838	0.897502
O14786	NRP1	-0.0614799	0.284339	0.347525
O14791	APOL1	-0.426445	6.70144e-06	2.17522e-05
O43866	CD5L	-0.190769	0.522912	0.583305
O75015	FCGR3B	-0.446808	0.25062	0.315784
O75460	ERN1	0.77758	1.35707e-06	4.71402e-06
O75636	FCN3	-0.274513	0.00782845	0.0142491
O75882	ATRN	-0.368216	5.82524e-07	2.19695e-06
O95445	APOM	-1.43284	3.38911e-13	5.16188e-12
O95497	VNN1	-1.19901	0.000206128	0.000523247
P00326	ADH1C	2.08723	0.00365929	0.00713832
P00338	LDHA	1.20937	0.1437	0.202509
P00441	SOD1	2.11104	6.76179e-06	2.17697e-05
P00450	CP	0.193507	0.00942386	0.0168101
P00488	F13A1	-1.51675	1.63418e-08	8.51494e-08
P00734	F2	-0.323207	3.29282e-08	1.57103e-07
P00736	C1R	0.308525	1.02283e-06	3.71597e-06
P00738	HP	0.577206	1.34137e-08	7.17813e-08
P00739	HPR	-0.553362	0.000814809	0.00179258
P00740	F9	-0.0873697	0.0492382	0.0750099
P00742	F10	-0.26967	0.000938889	0.00204286
P00746	CFD	0.391888	0.146257	0.204657
P00747	PLG	-0.280458	3.43519e-06	1.15283e-05
P00748	F12	-0.76714	2.52427e-07	1.07485e-06
P00751	CFB	0.410331	1.07062e-06	3.78541e-06
P00915	CA1	1.58786	0.00744949	0.0137209
P00918	CA2	2.58725	0.000406739	0.000958742
P01008	SERPINC1	-0.37269	3.00016e-07	1.21231e-06
P01009	SERPINA1	0.636387	4.86081e-13	7.12919e-12
P01011	SERPINA3	1.54288	1.7277e-14	7.09097e-13
P01019	AGT	0.384112	0.00071826	0.00161608
P01023	A2M	-0.215292	5.0023e-06	1.63712e-05
P01031	C5	-0.0726331	0.331986	0.398384
P01034	CST3	1.48607	2.26619e-08	1.12176e-07
P01042	KNG1	-0.135315	0.00855108	0.0153919
P01344	IGF2	-0.226215	0.118294	0.168505
P01591	IGJ	0.0906656	0.102319	0.146806
P01594	P01594	-0.144498	0.783682	0.825367
P01597	P01597	-0.286611	0.226255	0.290899
P01599	P01599	-0.431304	0.00744107	0.0137209
P01602	IGKV1-5	-0.121169	0.256955	0.320991
P01605	P01605	-0.466968	0.00567046	0.0107957
P01608	P01608	0.219774	0.773379	0.818871
P01609	P01609	0.155028	0.766563	0.813831
P01611	P01611	-0.53755	0.000122374	0.000323066
P01612	P01612	0.188198	0.41299	0.483859
P01613	P01613	-0.0350822	0.222852	0.287458
P01617	P01617	-0.0464485	0.967695	0.972608
P01619	P01619	-0.315942	0.0311964	0.0506302
P01620	P01620	0.150238	0.665887	0.724427
P01621	P01621	-0.570689	0.24222	0.308422
P01622	P01622	-0.0445274	0.964009	0.971438
P01624	P01624	-0.255182	0.815046	0.849364
P01701	P01701	-0.145242	0.340087	0.406872
P01707	P01707	-0.00981659	0.692173	0.748909
P01708	P01708	-0.665461	0.0010929	0.0023394
P01711	P01711	-1.18418	0.00678661	0.0127976
P01714	P01714	-0.0295379	0.477206	0.539924
P01717	P01717	-0.262619	0.00120182	0.00255872
P01719	P01719	-0.214138	0.260818	0.322762
P01742	P01742	0.376335	0.797638	0.835621
P01743	P01743	1.02142	0.319578	0.384659
P01766	P01766	-0.168138	0.167297	0.230033
P01768	P01768	0.0865766	0.84656	0.870747
P01772	P01772	0.717232	1.70501e-05	5.19374e-05
P01780	P01780	-0.0163514	0.835982	0.862106
P01782	P01782	-0.891136	0.0147524	0.0253998
P01824	P01824	0.285008	0.37692	0.445413
P01833	PIGR	0.890835	0.0606833	0.0917199
P01834	IGKC	0.0841351	0.258105	0.321286
P01857	IGHG1	0.1367	0.748604	0.801209
P01859	IGHG2	0.180817	0.23144	0.296602
P01860	IGHG3	0.467688	0.656084	0.715728
P01861	IGHG4	0.0564477	0.463415	0.530383
P01871	IGHM	-0.110441	0.964079	0.971438
P01876	IGHA1	-0.114404	0.0874387	0.12777
P01877	IGHA2	0.251767	0.468844	0.534356
P01880	IGHD	0.757341	0.55876	0.616348
P02042	HBD	1.67566	0.0269177	0.0438658
P02144	MB	6.27578	1.30556e-07	5.87504e-07
P02647	APOA1	-0.826215	1.52671e-13	2.825e-12
P02649	APOE	-0.776616	4.22589e-08	1.99221e-07
P02652	APOA2	-0.887614	3.13631e-11	3.02922e-10
P02654	APOC1	-1.79553	6.80685e-13	9.62246e-12
P02655	APOC2	-0.353575	0.00230963	0.00464272
P02656	APOC3	-0.310678	0.000260896	0.000633834
P02671	FGA	1.47425	1.30713e-13	2.58812e-12
P02675	FGB	4.49328	4.46041e-14	1.17755e-12
P02679	FGG	4.7066	3.38009e-14	1.02963e-12
P02741	CRP	7.02109	1.79065e-14	7.09097e-13
P02743	APCS	0.109668	0.180557	0.244029
P02745	C1QA	-0.69258	0.00105684	0.00227451
P02746	C1QB	-0.583643	7.2559e-05	0.000199537
P02747	C1QC	-0.570931	5.45438e-05	0.000156517
P02748	C9	0.715498	1.21321e-09	7.62586e-09
P02749	APOH	-0.166704	0.0456236	0.0722678
P02750	LRG1	1.98662	2.96919e-14	1.02963e-12
P02751	FN1	-1.52282	9.82372e-13	1.29673e-11
P02753	RBP4	-0.844081	1.2886e-10	1.05121e-09
P02760	AMBP	-0.161167	0.0159715	0.0272617
P02763	ORM1	0.617901	1.06286e-12	1.35772e-11
P02765	AHSG	-0.759773	1.7527e-10	1.33475e-09
P02766	TTR	-1.08017	1.79115e-12	2.08616e-11
P02774	GC	-0.376213	2.14792e-08	1.07668e-07
P02775	PPBP	-0.728837	0.000343244	0.000823784
P02776	PF4	0.539662	0.163202	0.225184
P02786	TFRC	-0.809867	1.70182e-09	1.0368e-08
P02787	TF	-0.46245	2.56077e-09	1.49127e-08
P03951	F11	-0.052822	0.790688	0.830537
P03952	KLKB1	-0.765682	2.98935e-10	2.23355e-09
P04003	C4BPA	0.231069	0.00226303	0.00459568
P04004	VTN	-0.0477949	0.503993	0.566992
P04040	CAT	2.81968	0.0177473	0.029906
P04070	PROC	-1.36284	7.93174e-14	1.74498e-12
P04075	ALDOA	-1.22864	1.93307e-08	9.81407e-08
P04114	APOB	-0.609343	7.9077e-05	0.000215962
P04180	LCAT	-1.21915	1.48279e-22	3.04448e-20
P04196	HRG	-0.499073	4.35727e-05	0.000125947
P04206	P04206	0.409765	0.00135729	0.00284384
P04207	P04207	-0.715835	1.63621e-05	5.02279e-05
P04208	P04208	-0.111135	0.219406	0.284868
P04209	P04209	-1.52535	0.00237513	0.00475026
P04211	P04211	-0.166341	0.171424	0.234893
P04217	A1BG	0.0543332	0.470402	0.534356
P04220	P04220	0.124906	0.178489	0.242061
P04275	VWF	1.44102	6.94145e-10	4.65901e-09
P04278	SHBG	-0.570811	0.000185419	0.000479908
P04406	GAPDH	2.88985	1.74626e-08	8.98077e-08
P04430	P04430	-0.541946	0.0175529	0.0297049
P04431	P04431	0.0668954	0.996411	0.996411
P04433	P04433	0.103929	0.752762	0.803487
P04746	AMY2A	0.0413054	0.111115	0.158851
P05062	ALDOB	5.75379	0.0225511	0.0375219
P05090	APOD	-0.691383	5.63219e-07	2.14456e-06
P05109	S100A8	4.86413	5.48487e-14	1.3575e-12
P05155	SERPING1	0.330698	2.06782e-05	6.25081e-05
P05156	CFI	-0.233214	9.3824e-05	0.000254481
P05160	F13B	-0.391862	1.41888e-07	6.31321e-07
P05362	ICAM1	2.08377	1.30074e-10	1.05121e-09
P05452	CLEC3B	-0.706514	4.65061e-11	4.38486e-10
P05543	SERPINA7	-0.341033	0.000246788	0.000603261
P05546	SERPIND1	-0.864167	8.20074e-21	1.0825e-18
P05976	MYL1	-0.527775	0.174663	0.237686
P06276	BCHE	-1.10324	7.01573e-17	5.69394e-15
P06310	P06310	-0.0499574	0.828987	0.857125
P06311	P06311	-0.0390957	0.439146	0.508485
P06312	IGKV4-1	-0.23495	0.0462351	0.0726551
P06317	P06317	0.0808241	0.917602	0.931719
P06318	P06318	0.0647425	0.896214	0.914693
P06331	P06331	0.0785081	0.294549	0.357795
P06396	GSN	-0.66239	3.26674e-14	1.02963e-12
P06681	C2	0.342383	0.0002117	0.00053059
P06702	S100A9	3.56583	1.12219e-13	2.33888e-12
P06727	APOA4	-0.99957	1.07656e-10	9.07057e-10
P06732	CKM	3.82257	0.00707006	0.0132689
P06733	ENO1	2.54631	0.000527593	0.00120767
P06889	P06889	0.392679	0.123956	0.175938
P07195	LDHB	1.4182	5.67824e-05	0.000161768
P07225	PROS1	-0.302475	4.82858e-07	1.89319e-06
P07237	P4HB	2.63514	0.0472393	0.0736487
P07307	ASGR2	1.83493	2.92369e-08	1.41193e-07
P07333	CSF1R	-0.0580011	0.0651536	0.0977303
P07339	CTSD	0.69992	0.000373982	0.000892149
P07357	C8A	0.307551	3.96e-05	0.00011616
P07358	C8B	-0.0843091	0.406425	0.477579
P07359	GP1BA	-0.665837	1.51666e-10	1.17764e-09
P07360	C8G	0.313665	0.000241054	0.000596609
P07478	PRSS2	0.423337	0.00784422	0.0142491
P07602	PSAP	0.858256	0.232501	0.297001
P07737	PFN1	2.20689	5.23064e-07	2.03072e-06
P07900	HSP90AA1	4.86354	9.76068e-05	0.000262941
P08185	SERPINA6	-0.355474	6.91808e-05	0.00019371
P08254	MMP3	0.22086	0.251192	0.315784
P08294	SOD3	0.353305	0.212802	0.281838
P08319	ADH4	6.32638	1.67884e-07	7.30571e-07
P08519	LPA	-0.582329	0.0809894	0.119671
P08571	CD14	0.728251	3.68162e-09	2.11293e-08
P08603	CFH	-0.125223	0.218764	0.284868
P08637	FCGR3A	0.090591	0.801067	0.836999
P08697	SERPINF2	-0.0154337	0.817431	0.849613
P08709	F7	-1.6103	1.77753e-09	1.06652e-08
P09172	DBH	-0.634337	0.0138826	0.024112
P09486	SPARC	-0.95406	7.32722e-10	4.75669e-09
P09871	C1S	0.250643	0.00728666	0.0136007
P0C0L4	C4A	0.26457	0.0482109	0.0745763
P0C0L5	C4B	0.105141	0.527244	0.586485
P0CG05	IGLC2	0.0949064	0.17419	0.237686
P0CG06	IGLC3	0.41343	0.296521	0.359089
P0DJI8	SAA1	5.9442	1.70772e-14	7.09097e-13
P0DJI9	SAA2	11.0683	1.43045e-14	7.09097e-13
P10124	SRGN	-0.270377	0.218037	0.284868
P10643	C7	0.453884	0.00619995	0.0117473
P10909	CLU	-0.640262	6.43709e-12	6.88942e-11
P11021	HSPA5	0.545582	0.0951815	0.137061
P11142	HSPA8	2.39307	0.738572	0.794767
P11226	MBL2	-0.2818	0.186067	0.249771
P11597	CETP	-1.13946	6.14728e-11	5.40961e-10
P12109	COL6A1	0.75002	0.216831	0.284321
P12111	COL6A3	0.349816	0.1629	0.225184
P12259	F5	-0.498606	8.37749e-08	3.85754e-07
P12830	CDH1	-0.568015	0.0491499	0.0750099
P12955	PEPD	-0.71071	2.30748e-05	6.87039e-05
P13473	LAMP2	-1.57428	0.000410666	0.000962269
P13489	RNH1	-1.45999	0.0116367	0.0204806
P13591	NCAM1	-1.43731	8.65599e-09	4.69558e-08
P13598	ICAM2	-0.0237239	0.186001	0.249771
P13671	C6	-0.162449	0.0182903	0.0306904
P13796	LCP1	0.752091	4.84962e-06	1.60038e-05
P13797	PLS3	-0.0515136	0.247998	0.314766
P13987	CD59	3.08085	5.05779e-10	3.51383e-09
P14151	SELL	-0.50679	2.21659e-06	7.56698e-06
P14543	NID1	1.26817	2.35639e-05	6.96365e-05
P14618	PKM	-1.2873	0.0330873	0.05348
P14625	HSP90B1	0.84103	8.04685e-07	2.95051e-06
P15144	ANPEP	-0.29461	0.0119263	0.0208974
P15151	PVR	0.365164	0.00479577	0.00921905
P15169	CPN1	0.413365	0.00176712	0.00366377
P15814	IGLL1	-0.444532	0.00399282	0.00775076
P15924	DSP	-0.81534	0.0481549	0.0745763
P16070	CD44	-0.312378	0.00020217	0.000516513
P16930	FAH	5.69421	3.24622e-10	2.38056e-09
P17936	IGFBP3	-0.770962	1.10593e-09	7.06371e-09
P18065	IGFBP2	1.57013	0.000176088	0.000458757
P18135	P18135	0.441315	0.0625236	0.094142
P18206	VCL	0.189754	0.159976	0.222283
P18428	LBP	2.89664	4.01025e-14	1.13433e-12
P19320	VCAM1	1.59364	1.56705e-08	8.274e-08
P19652	ORM2	0.548486	1.6253e-07	7.1513e-07
P19823	ITIH2	-0.810689	1.46672e-11	1.45205e-10
P19827	ITIH1	-0.49216	1.57833e-12	1.894e-11
P19838	NFKB1	0.0794744	0.444331	0.511497
P20742	PZP	0.343115	0.276409	0.338879
P20851	C4BPB	-0.19084	0.0933168	0.134867
P22105	TNXB	-0.388987	0.00453222	0.00875491
P22352	GPX3	-0.00626332	0.956833	0.969068
P22692	IGFBP4	2.58896	8.81553e-11	7.58902e-10
P22792	CPN2	0.130453	0.300508	0.362808
P22891	PROZ	-1.16687	2.62226e-07	1.08168e-06
P22897	MRC1	1.52029	0.00133637	0.00281491
P23083	P23083	0.503488	0.441828	0.510099
P23142	FBLN1	-0.0751412	0.361656	0.430077
P23470	PTPRG	-0.905416	0.00188202	0.00388167
P23528	CFL1	0.361099	0.53774	0.596485
P24158	PRTN3	3.2047	6.59935e-09	3.72491e-08
P24821	TNC	3.74502	1.48553e-10	1.17654e-09
P25311	AZGP1	-0.217307	0.000451308	0.00104513
P26038	MSN	2.76987	0.00778487	0.0142491
P26927	MST1	-0.718825	7.92411e-07	2.93266e-06
P27169	PON1	-1.0896	7.18932e-17	5.69394e-15
P27487	DPP4	-1.52091	8.63793e-08	3.93175e-07
P27797	CALR	2.2792	1.21916e-05	3.83163e-05
P27918	CFP	-0.688998	2.58341e-07	1.08168e-06
P28838	LAP3	0.61626	0.216831	0.284321
P29401	TKT	4.20616	5.50444e-10	3.7582e-09
P29622	SERPINA4	-1.31666	2.50352e-13	4.13082e-12
P30101	PDIA3	-1.23101	1.46827e-09	9.08492e-09
P31327	CPS1	6.19528	0.581861	0.638274
P31946	YWHAB	-0.0751596	0.432546	0.503789
P32119	PRDX2	1.70475	0.0262998	0.043036
P33151	CDH5	-0.575571	1.50897e-05	4.66837e-05
P33908	MAN1A1	0.174842	0.194991	0.259988
P35443	THBS4	2.20782	0.000825053	0.00180509
P35542	SAA4	-0.708357	4.17887e-07	1.65483e-06
P35858	IGFALS	-1.60342	1.53762e-22	3.04448e-20
P36955	SERPINF1	-0.0791774	0.188806	0.252591
P36980	CFHR2	-0.00234405	0.28644	0.349016
P37802	TAGLN2	0.424242	0.216602	0.284321
P37837	TALDO1	1.60383	0.00245382	0.00488297
P37840	SNCA	-0.767331	0.0100635	0.0178707
P40189	IL6ST	-0.836462	0.000240423	0.000596609
P40197	GP5	-1.38125	1.15569e-06	4.05003e-06
P41222	PTGDS	1.22952	0.000246122	0.000603261
P43121	MCAM	-0.350167	0.0364473	0.0584804
P43251	BTD	-0.493032	2.88565e-06	9.76682e-06
P43652	AFM	-0.772666	5.45222e-11	4.907e-10
P47756	CAPZB	-1.23662	1.9566e-09	1.15644e-08
P48740	MASP1	-0.47217	0.000168024	0.000440647
P49747	COMP	0.253375	0.207922	0.276298
P49908	SEPP1	-1.4678	3.17284e-13	5.02577e-12
P51884	LUM	-0.305225	0.000106856	0.000285912
P54108	CRISP3	-0.272414	0.0242233	0.0399685
P55056	APOC4	-2.51097	1.37307e-11	1.39419e-10
P55058	PLTP	-0.324722	7.10674e-05	0.000196802
P55103	INHBC	-0.439999	0.0222824	0.0372313
P55290	CDH13	-0.896838	7.26917e-10	4.75669e-09
P59666	DEFA3	2.20324	2.54643e-08	1.24492e-07
P60709	ACTB	1.70238	9.4556e-12	9.85373e-11
P61769	B2M	1.46389	5.44058e-11	4.907e-10
P62328	TMSB4X	0.675317	0.0364764	0.0584804
P63104	YWHAZ	2.64649	4.0077e-05	0.000116695
P68133	ACTA1	1.78574	2.26789e-12	2.56596e-11
P68871	HBB	0.952999	0.00837735	0.0151481
P69905	HBA1	1.22286	0.00326327	0.00642913
P78324	SIRPA	-0.699018	2.9991e-07	1.21231e-06
P80188	LCN2	2.91702	0.00011651	0.00030965
P80511	S100A12	-0.10624	0.913976	0.930423
P80748	P80748	0.211523	0.258814	0.321286
P98160	HSPG2	0.0938783	0.982056	0.984542
Q01459	CTBS	-0.471353	0.00355812	0.00697532
Q02818	NUCB1	3.37646	4.78422e-12	5.26264e-11
Q02985	CFHR3	0.448282	0.34944	0.416802
Q03591	CFHR1	0.291655	0.0832596	0.122204
Q04756	HGFAC	-0.736315	4.26736e-10	3.01764e-09
Q06033	ITIH3	0.876121	3.43373e-10	2.47229e-09
Q06141	REG3A	0.0619938	0.436518	0.506924
Q08380	LGALS3BP	0.132839	0.377927	0.445413
Q08830	FGL1	2.79601	7.42954e-08	3.46129e-07
Q10588	BST1	-0.398207	0.555177	0.614107
Q12805	EFEMP1	0.169118	0.27628	0.338879
Q12860	CNTN1	-0.190746	0.221036	0.286047
Q12913	PTPRJ	-0.483611	0.00076489	0.00169274
Q13103	SPP2	-3.11223	6.30493e-14	1.46868e-12
Q13201	MMRN1	-0.0833803	0.463261	0.530383
Q13228	SELENBP1	2.22666	0.00230399	0.00464272
Q13790	APOF	0.295571	0.0443364	0.0707952
Q14126	DSG2	-0.45241	0.0492489	0.0750099
Q14515	SPARCL1	0.971121	0.00294873	0.00583849
Q14520	HABP2	-0.330167	6.94618e-05	0.00019371
Q14624	ITIH4	0.244911	6.66898e-05	0.000188637
Q15063	POSTN	0.848999	0.00896184	0.0160583
Q15166	PON3	-0.823951	3.84255e-06	1.2787e-05
Q15485	FCN2	-0.0484841	0.822066	0.852194
Q15582	TGFBI	-0.0529383	0.514078	0.57507
Q15848	ADIPOQ	-0.0209241	0.365949	0.433879
Q16610	ECM1	-0.478879	2.18536e-07	9.40655e-07
Q16706	MAN2A1	-0.071794	0.470935	0.534356
Q16851	UGP2	1.60699	0.598448	0.654656
Q16853	AOC3	-0.84933	1.44854e-05	4.51671e-05
Q4G0P3	HYDIN	-0.345782	0.0142263	0.0246009
Q5VU43	PDE4DIP	1.12223	7.67585e-07	2.86758e-06
Q6EMK4	VASN	-0.177798	0.00224626	0.00458516
Q6UWP8	SBSN	1.15496	0.0897693	0.130693
Q6UX71	PLXDC2	-0.389909	0.00043406	0.0010111
Q6UXB8	PI16	-0.602937	7.46577e-06	2.3682e-05
Q7Z7G0	ABI3BP	0.241291	0.669095	0.725923
Q86U17	SERPINA11	-0.480245	0.0232258	0.038483
Q86UD1	OAF	0.638225	1.49275e-06	5.14027e-06
Q86VB7	CD163	1.48356	7.47538e-06	2.3682e-05
Q8IZF2	GPR116	0.100009	0.756289	0.805082
Q8N8K9	KIAA1958	-1.71083	1.05656e-06	3.77454e-06
Q8NBJ4	GOLM1	0.77703	0.0470953	0.0736487
Q8NHW5	RPLP0P6	-0.630856	0.000383999	0.00091056
Q8WZ42	TTN	0.973388	0.000629397	0.00142424
Q92496	CFHR4	-0.183691	0.422732	0.49381
Q92820	GGH	-0.57952	2.24669e-05	6.74008e-05
Q92835	INPP5D	-0.506869	0.0168825	0.028693
Q92954	PRG4	-0.447935	0.000753598	0.00168602
Q96BY2	MOAP1	-0.764522	0.0757827	0.112397
Q96IY4	CPB2	-0.739731	6.6785e-09	3.72491e-08
Q96KN2	CNDP1	-1.32632	2.10084e-13	3.6171e-12
Q96KP4	CNDP2	-0.549472	0.00512646	0.00980714
Q96PD5	PGLYRP2	-0.978053	6.72518e-15	4.43862e-13
Q96RL7	VPS13A	-0.727755	0.00130037	0.00275373
Q99784	OLFM1	-0.561145	0.000506315	0.0011657
Q99996	AKAP9	-0.158116	0.272303	0.335925
Q9BTY2	FUCA2	0.0748224	0.729012	0.786618
Q9BWP8	COLEC11	-0.278261	0.0159032	0.0272617
Q9H257	CARD9	0.0512418	0.746023	0.80061
Q9H4A4	RNPEP	2.30327	2.60815e-07	1.08168e-06
Q9H8L6	MMRN2	-0.55044	0.0454217	0.0722369
Q9HDC9	APMAP	-0.614153	0.00100896	0.00218332
Q9NPH3	IL1RAP	-0.684638	1.05802e-06	3.77454e-06
Q9NPR2	SEMA4B	1.0281	0.000314312	0.00075895
Q9NPY3	CD93	0.181312	0.510209	0.57236
Q9NQ79	CRTAC1	-1.78093	7.04675e-13	9.62246e-12
Q9NR09	BIRC6	-1.08031	0.000599647	0.00136471
Q9NU22	MDN1	-1.3369	5.62771e-07	2.14456e-06
Q9NZP8	C1RL	-0.0901669	0.146014	0.204657
Q9UGM5	FETUB	-1.24672	1.56945e-13	2.825e-12
Q9UHG3	PCYOX1	-1.9892	1.31046e-12	1.62169e-11
Q9UJJ9	GNPTG	-0.503085	0.070322	0.105085
Q9UK55	SERPINA10	0.303435	0.0530526	0.0804935
Q9UNN8	PROCR	-0.391376	0.0102154	0.0180594
Q9Y4L1	HYOU1	0.437736	0.0259747	0.0426804
Q9Y5Y7	LYVE1	0.453186	0.0122209	0.0213193
Q9Y6R7	FCGBP	1.69921	0.0458103	0.0722744
Q9Y6Z7	COLEC10	-0.492154	0.00205926	0.00422522
